# Supplementary material
Source: publisher site journal article supplement (https://www.dovepress.com/article/340119)
Supplement: Supplementary file 1 [file get_supplementary_file.php]

**Table S1** The raw data about LUAD and LUSC in TCGA database

| RNAseq<br>sample number              | Status | Type | Residual<br>tumor | Pathologic<br>stage | M stage | N stage | T stage | Smoker | Vital<br>status | Gender | Race          | Age at initial<br>pathologic<br>diagnosis | OS   |
|--------------------------------------|--------|------|-------------------|---------------------|---------|---------|---------|--------|-----------------|--------|---------------|-------------------------------------------|------|
| TCGA-05-<br>4244-01A-01R-<br>1107-07 | Tumor  | LUAD | RX                | Stage IV            | M1      | N2      | T2      | Yes    | Alive           | MALE   | Not Available | 70                                        | 0    |
| TCGA-05-<br>4249-01A-01R-<br>1107-07 | Tumor  | LUAD | R0                | Stage IB            | M0      | N0      | T2      | Yes    | Alive           | MALE   | Not Available | 67                                        | 1523 |
| TCGA-05-<br>4250-01A-01R-<br>1107-07 | Tumor  | LUAD | R2                | Stage IIIA          | M0      | N1      | T3      | Yes    | Dead            | FEMALE | Not Available | 79                                        | 121  |
| TCGA-05-<br>4382-01A-01R-<br>1206-07 | Tumor  | LUAD | R0                | Stage IB            | M0      | N0      | T2      | Yes    | Alive           | MALE   | Not Available | 68                                        | 607  |
| TCGA-05-<br>4384-01A-01R-<br>1755-07 | Tumor  | LUAD | RX                | Stage IIIA          | M0      | N2      | T2      | Yes    | Alive           | MALE   | Not Available | 66                                        | 426  |
| TCGA-05-<br>4389-01A-01R-<br>1206-07 | Tumor  | LUAD | R0                | Stage IA            | M0      | N0      | T1      | Yes    | Alive           | MALE   | Not Available | 70                                        | 1369 |

|                              |       |      |    |            |    |    |    |     |       |        |               |    |      |
|------------------------------|-------|------|----|------------|----|----|----|-----|-------|--------|---------------|----|------|
| TCGA-05-4390-01A-02R-1755-07 | Tumor | LUAD | R0 | Stage IB   | M0 | N0 | T2 | Yes | Alive | FEMALE | Not Available | 58 | 1126 |
| TCGA-05-4395-01A-01R-1206-07 | Tumor | LUAD | R0 | Stage IIIB | M0 | N2 | T4 | Yes | Dead  | MALE   | Not Available | 76 | 0    |
| TCGA-05-4396-01A-21R-1858-07 | Tumor | LUAD | R0 | Stage IIIB | M0 | N1 | T4 | Yes | Dead  | MALE   | Not Available | 76 | 303  |
| TCGA-05-4397-01A-01R-1206-07 | Tumor | LUAD | R0 | Stage IIB  | M0 | N1 | T2 | Yes | Dead  | MALE   | Not Available | 65 | 731  |
| TCGA-05-4398-01A-01R-1206-07 | Tumor | LUAD | R0 | Stage IIIB | M0 | N3 | T4 | Yes | Alive | FEMALE | Not Available | 47 | 1431 |
| TCGA-05-4402-01A-01R-1206-07 | Tumor | LUAD | R2 | Stage IV   | M1 | NX | T2 | No  | Dead  | FEMALE | Not Available | 57 | 244  |
| TCGA-05-4403-01A-01R-1206-07 | Tumor | LUAD | R0 | Stage IB   | M0 | N0 | T2 | Yes | Alive | MALE   | Not Available | 76 | 578  |

|                              |       |      |    |            |    |    |    |     |       |        |               |    |     |
|------------------------------|-------|------|----|------------|----|----|----|-----|-------|--------|---------------|----|-----|
| TCGA-05-4405-01A-21R-1858-07 | Tumor | LUAD | R0 | Stage IB   | M0 | N0 | T2 | Yes | Alive | FEMALE | Not Available | 74 | 610 |
| TCGA-05-4410-01A-21R-1858-07 | Tumor | LUAD | RX | Stage IB   | M0 | N0 | T2 | Yes | Alive | MALE   | Not Available | 62 | 0   |
| TCGA-05-4415-01A-22R-1858-07 | Tumor | LUAD | R0 | Stage IIIB | M0 | N2 | T4 | Yes | Dead  | MALE   | Not Available | 57 | 91  |
| TCGA-05-4417-01A-22R-1858-07 | Tumor | LUAD | R0 | Stage IB   | M0 | N0 | T2 | Yes | Alive | FEMALE | Not Available | 51 | 455 |
| TCGA-05-4418-01A-01R-1206-07 | Tumor | LUAD | R0 | Stage IIIA | M0 | N2 | T3 | Yes | Dead  | MALE   | Not Available | 69 | 274 |
| TCGA-05-4420-01A-01R-1206-07 | Tumor | LUAD | R0 | Stage IB   | M0 | N0 | T2 | Yes | Alive | MALE   | Not Available | 41 | 912 |
| TCGA-05-4422-01A-01R-1206-07 | Tumor | LUAD | R0 | Stage IB   | M0 | N0 | T2 | Yes | Alive | MALE   | Not Available | 68 | 365 |

|                              |       |      |    |           |    |    |    |     |       |        |               |    |     |
|------------------------------|-------|------|----|-----------|----|----|----|-----|-------|--------|---------------|----|-----|
| TCGA-05-4424-01A-22R-1858-07 | Tumor | LUAD | R1 | Stage IIB | M0 | N0 | T3 | Yes | Alive | MALE   | Not Available | 70 | 913 |
| TCGA-05-4425-01A-01R-1755-07 | Tumor | LUAD | R1 | Stage IV  | M1 | N0 | T2 | Yes | Alive | FEMALE | Not Available | 70 | 669 |
| TCGA-05-4426-01A-01R-1206-07 | Tumor | LUAD | R0 | Stage IB  | M0 | N0 | T2 | Yes | Alive | MALE   | Not Available | 71 | 791 |
| TCGA-05-4427-01A-21R-1858-07 | Tumor | LUAD | R0 | Stage IIB | M0 | N1 | T2 | Yes | Alive | FEMALE | Not Available | 65 | 791 |
| TCGA-05-4430-01A-02R-1206-07 | Tumor | LUAD | R0 | Stage IB  | M0 | N0 | T2 | Yes | Alive | FEMALE | Not Available | 59 | 761 |
| TCGA-05-4432-01A-01R-1206-07 | Tumor | LUAD | R0 | Stage IIB | M0 | N1 | T2 | Yes | Alive | MALE   | Not Available | 66 | 761 |
| TCGA-05-4433-01A-22R-1858-07 | Tumor | LUAD | R0 | Stage IB  | M0 | N0 | T2 | Yes | Alive | MALE   | Not Available | 82 | 730 |

|                              |       |      |    |            |    |    |     |     |       |        |               |    |     |
|------------------------------|-------|------|----|------------|----|----|-----|-----|-------|--------|---------------|----|-----|
| TCGA-05-4434-01A-01R-1206-07 | Tumor | LUAD | R2 | Stage IV   | M1 | N1 | T4  | Yes | Dead  | FEMALE | Not Available | 67 | 457 |
| TCGA-05-5420-01A-01R-1628-07 | Tumor | LUAD | R0 | Stage IIIA | M0 | N2 | T2  | Yes | Alive | MALE   | Not Available | 67 | 457 |
| TCGA-05-5423-01A-01R-1628-07 | Tumor | LUAD | R0 | Stage IIB  | M0 | N1 | T2  | Yes | Alive | MALE   | Not Available | 65 | 151 |
| TCGA-05-5425-01A-02R-1628-07 | Tumor | LUAD | R0 | Stage IIB  | M0 | N1 | T2b | Yes | Alive | MALE   | Not Available | 68 | 882 |
| TCGA-05-5428-01A-01R-1628-07 | Tumor | LUAD | R0 | Stage IIA  | M0 | N1 | T1b | Yes | Alive | MALE   | Not Available | 57 | 670 |
| TCGA-05-5429-01A-01R-1628-07 | Tumor | LUAD | R0 | Stage IIIA | M0 | N2 | T3  | No  | Alive | MALE   | Not Available | 60 | 275 |
| TCGA-05-5715-01A-01R-1628-07 | Tumor | LUAD | R0 | Stage IB   | M0 | N0 | T2a | No  | Alive | FEMALE | Not Available | 69 | 62  |

|                              |        |      |    |             |    |    |     |     |       |        |       |    |      |
|------------------------------|--------|------|----|-------------|----|----|-----|-----|-------|--------|-------|----|------|
| TCGA-35-3615-01A-01R-0946-07 | Tumor  | LUAD | R0 | Stage IB    | M0 | N0 | T2  | No  | Alive | MALE   | WHITE | 57 | 14   |
| TCGA-35-4122-01A-01R-1107-07 | Tumor  | LUAD | R0 | Stage IA    | M0 | N0 | T1  | Yes | Alive | MALE   | WHITE | 69 | 225  |
| TCGA-35-4123-01A-01R-1107-07 | Tumor  | LUAD | R0 | Stage IA    | M0 | N0 | T1  | Yes | Alive | MALE   | WHITE | 38 | 182  |
| TCGA-35-5375-01A-01R-1628-07 | Tumor  | LUAD | R0 | Stage IIIA  | M0 | N2 | T2  | Yes | Alive | MALE   | WHITE | 61 | 264  |
| TCGA-38-4625-01A-01R-1206-07 | Tumor  | LUAD | R0 | Stage IB    | M0 | N0 | T2a | Yes | Alive | FEMALE | WHITE | 66 | 2973 |
| TCGA-38-4625-11A-01R-1758-07 | Normal | LUAD | R0 | Stage IB    | M0 | N0 | T2a | Yes | Alive | FEMALE | WHITE | 66 | 2973 |
| TCGA-38-4626-01A-01R-1206-07 | Tumor  | LUAD | R0 | Discrepancy | M0 | N0 | T2b | Yes | Alive | FEMALE | WHITE | 57 | 3674 |

|                              |        |      |    |             |    |    |     |     |       |        |       |    |      |
|------------------------------|--------|------|----|-------------|----|----|-----|-----|-------|--------|-------|----|------|
| TCGA-38-4626-11A-01R-1758-07 | Normal | LUAD | R0 | Discrepancy | M0 | N0 | T2b | Yes | Alive | FEMALE | WHITE | 57 | 3674 |
| TCGA-38-4627-01A-01R-1206-07 | Tumor  | LUAD | R0 | Stage IIA   | M0 | N1 | T1b | Yes | Dead  | FEMALE | WHITE | 64 | 1147 |
| TCGA-38-4627-11A-01R-1758-07 | Normal | LUAD | R0 | Stage IIA   | M0 | N1 | T1b | Yes | Dead  | FEMALE | WHITE | 64 | 1147 |
| TCGA-38-4628-01A-01R-1206-07 | Tumor  | LUAD | R0 | Stage IIB   | M0 | N1 | T2  | No  | Dead  | FEMALE | WHITE | 65 | 1492 |
| TCGA-38-4629-01A-02R-1206-07 | Tumor  | LUAD | R0 | Stage IIB   | M0 | N0 | T3  | Yes | Dead  | MALE   | WHITE | 68 | 864  |
| TCGA-38-4630-01A-01R-1206-07 | Tumor  | LUAD | R1 | Stage IB    | M0 | N0 | T2  | No  | Dead  | FEMALE | WHITE | 75 | 1073 |
| TCGA-38-4631-01A-01R-1755-07 | Tumor  | LUAD | R0 | Stage IB    | M0 | N0 | T2  | Yes | Dead  | FEMALE | WHITE | 72 | 354  |

|                              |        |      |    |            |                  |    |     |     |       |        |                              |    |    |      |
|------------------------------|--------|------|----|------------|------------------|----|-----|-----|-------|--------|------------------------------|----|----|------|
| TCGA-38-4632-01A-01R-1755-07 | Tumor  | LUAD | R0 | Stage IV   | M1               | N1 | T2  | Yes | Dead  | MALE   | BLACK<br>AFRICAN<br>AMERICAN | OR | 42 | 1357 |
| TCGA-38-4632-11A-01R-1755-07 | Normal | LUAD | R0 | Stage IV   | M1               | N1 | T2  | Yes | Dead  | MALE   | BLACK<br>AFRICAN<br>AMERICAN | OR | 42 | 1357 |
| TCGA-38-6178-01A-11R-1755-07 | Tumor  | LUAD | R1 | Stage IIIA | Not<br>Available | N2 | T2b | No  | Alive | FEMALE | WHITE                        |    | 70 | 448  |
| TCGA-38-7271-01A-11R-2039-07 | Tumor  | LUAD | R0 | Stage IA   | M0               | N0 | T1  | Yes | Dead  | FEMALE | WHITE                        |    | 72 | 800  |
| TCGA-38-A44F-01A-11R-A24H-07 | Tumor  | LUAD | R0 | Stage IB   | M0               | N0 | T2a | Yes | Alive | MALE   | WHITE                        |    | 80 | 133  |



|                              |        |      |               |          |    |    |    |     |       |        |       |    |      |
|------------------------------|--------|------|---------------|----------|----|----|----|-----|-------|--------|-------|----|------|
| TCGA-44-2655-01A-01R-0946-07 | Tumor  | LUAD | R0            | Stage IA | M0 | N0 | T1 | Yes | Alive | FEMALE | WHITE | 65 | 1324 |
| TCGA-44-2655-11A-01R-1758-07 | Normal | LUAD | R0            | Stage IA | M0 | N0 | T1 | Yes | Alive | FEMALE | WHITE | 65 | 1324 |
| TCGA-44-2656-01A-02R-0946-07 | Tumor  | LUAD | Not Available | Stage IB | M0 | N0 | T2 | Yes | Alive | MALE   | WHITE | 59 | 1429 |
| TCGA-44-2656-01A-02R-A278-07 | Tumor  | LUAD | Not Available | Stage IB | M0 | N0 | T2 | Yes | Alive | MALE   | WHITE | 59 | 1429 |
| TCGA-44-2656-01B-06R-A277-07 | Tumor  | LUAD | Not Available | Stage IB | M0 | N0 | T2 | Yes | Alive | MALE   | WHITE | 59 | 1429 |
| TCGA-44-2657-01A-01R-1107-07 | Tumor  | LUAD | R0            | Stage IB | M0 | NX | T2 | Yes | Alive | FEMALE | WHITE | 74 | 1351 |
| TCGA-44-2657-11A-01R-1758-07 | Normal | LUAD | R0            | Stage IB | M0 | NX | T2 | Yes | Alive | FEMALE | WHITE | 74 | 1351 |

|                              |        |      |    |           |    |    |    |     |       |        |       |    |      |
|------------------------------|--------|------|----|-----------|----|----|----|-----|-------|--------|-------|----|------|
| TCGA-44-2659-01A-01R-0946-07 | Tumor  | LUAD | R0 | Stage IIB | M0 | N1 | T1 | Yes | Alive | FEMALE | WHITE | 65 | 1367 |
| TCGA-44-2661-01A-01R-1107-07 | Tumor  | LUAD | R0 | Stage IA  | M0 | N0 | T1 | No  | Alive | FEMALE | WHITE | 69 | 1159 |
| TCGA-44-2661-11A-01R-1758-07 | Normal | LUAD | R0 | Stage IA  | M0 | N0 | T1 | No  | Alive | FEMALE | WHITE | 69 | 1159 |
| TCGA-44-2662-01A-01R-0946-07 | Tumor  | LUAD | R0 | Stage IB  | M0 | N0 | T2 | Yes | Alive | MALE   | WHITE | 65 | 1280 |
| TCGA-44-2662-01A-01R-A278-07 | Tumor  | LUAD | R0 | Stage IB  | M0 | N0 | T2 | Yes | Alive | MALE   | WHITE | 65 | 1280 |
| TCGA-44-2662-01B-02R-A277-07 | Tumor  | LUAD | R0 | Stage IB  | M0 | N0 | T2 | Yes | Alive | MALE   | WHITE | 65 | 1280 |
| TCGA-44-2662-11A-01R-1758-07 | Normal | LUAD | R0 | Stage IB  | M0 | N0 | T2 | Yes | Alive | MALE   | WHITE | 65 | 1280 |

|                                      |        |      |    |           |    |    |    |     |       |        |       |    |      |
|--------------------------------------|--------|------|----|-----------|----|----|----|-----|-------|--------|-------|----|------|
| TCGA-44-<br>2665-01A-01R-<br>0946-07 | Tumor  | LUAD | R0 | Stage IIB | M0 | N1 | T2 | No  | Alive | FEMALE | WHITE | 55 | 1301 |
| TCGA-44-<br>2665-11A-01R-<br>1758-07 | Normal | LUAD | R0 | Stage IIB | M0 | N1 | T2 | No  | Alive | FEMALE | WHITE | 55 | 1301 |
| TCGA-44-<br>2666-01A-01R-<br>0946-07 | Tumor  | LUAD | R0 | Stage IB  | M0 | N0 | T2 | Yes | Dead  | MALE   | WHITE | 43 | 97   |
| TCGA-44-<br>2666-01A-01R-<br>A278-07 | Tumor  | LUAD | R0 | Stage IB  | M0 | N0 | T2 | Yes | Dead  | MALE   | WHITE | 43 | 97   |
| TCGA-44-<br>2666-01B-02R-<br>A277-07 | Tumor  | LUAD | R0 | Stage IB  | M0 | N0 | T2 | Yes | Dead  | MALE   | WHITE | 43 | 97   |
| TCGA-44-<br>2668-01A-01R-<br>0946-07 | Tumor  | LUAD | R0 | Stage IB  | M0 | N0 | T2 | Yes | Alive | MALE   | WHITE | 51 | 761  |
| TCGA-44-<br>2668-01A-01R-<br>A278-07 | Tumor  | LUAD | R0 | Stage IB  | M0 | N0 | T2 | Yes | Alive | MALE   | WHITE | 51 | 761  |

|                              |        |      |    |            |    |    |     |     |       |        |       |    |      |
|------------------------------|--------|------|----|------------|----|----|-----|-----|-------|--------|-------|----|------|
| TCGA-44-2668-01B-02R-A277-07 | Tumor  | LUAD | R0 | Stage IB   | M0 | N0 | T2  | Yes | Alive | MALE   | WHITE | 51 | 761  |
| TCGA-44-2668-11A-01R-1758-07 | Normal | LUAD | R0 | Stage IB   | M0 | N0 | T2  | Yes | Alive | MALE   | WHITE | 51 | 761  |
| TCGA-44-3396-01A-01R-1206-07 | Tumor  | LUAD | R0 | Stage IIIA | M0 | N2 | T2  | Yes | Alive | FEMALE | WHITE | 74 | 1130 |
| TCGA-44-3396-11A-01R-1758-07 | Normal | LUAD | R0 | Stage IIIA | M0 | N2 | T2  | Yes | Alive | FEMALE | WHITE | 74 | 1130 |
| TCGA-44-3398-01A-01R-1107-07 | Tumor  | LUAD | R0 | Stage IA   | M0 | N0 | T1b | Yes | Alive | FEMALE | WHITE | 77 | 1163 |
| TCGA-44-3398-11B-01R-1758-07 | Normal | LUAD | R0 | Stage IA   | M0 | N0 | T1b | Yes | Alive | FEMALE | WHITE | 77 | 1163 |
| TCGA-44-3917-01A-01R-A278-07 | Tumor  | LUAD | R0 | Stage IB   | M0 | N0 | T2  | Yes | Alive | FEMALE | WHITE | 33 | 1183 |

|                              |       |      |    |          |    |    |     |     |       |        |       |    |      |
|------------------------------|-------|------|----|----------|----|----|-----|-----|-------|--------|-------|----|------|
| TCGA-44-3917-01B-02R-A277-07 | Tumor | LUAD | R0 | Stage IB | M0 | N0 | T2  | Yes | Alive | FEMALE | WHITE | 33 | 1183 |
| TCGA-44-3918-01A-01R-1107-07 | Tumor | LUAD | R0 | Stage IA | M0 | N0 | T1  | Yes | Alive | FEMALE | WHITE | 60 | 1036 |
| TCGA-44-3918-01A-01R-A278-07 | Tumor | LUAD | R0 | Stage IA | M0 | N0 | T1  | Yes | Alive | FEMALE | WHITE | 60 | 1036 |
| TCGA-44-3918-01B-02R-A277-07 | Tumor | LUAD | R0 | Stage IA | M0 | N0 | T1  | Yes | Alive | FEMALE | WHITE | 60 | 1036 |
| TCGA-44-3919-01A-02R-1107-07 | Tumor | LUAD | R0 | Stage IA | M0 | N0 | T1  | No  | Alive | FEMALE | WHITE | 71 | 1026 |
| TCGA-44-4112-01A-01R-1107-07 | Tumor | LUAD | R0 | Stage IB | M0 | N0 | T2a | Yes | Alive | FEMALE | WHITE | 60 | 808  |
| TCGA-44-4112-01B-06R-A277-07 | Tumor | LUAD | R0 | Stage IB | M0 | N0 | T2a | Yes | Alive | FEMALE | WHITE | 60 | 808  |

|                              |       |      |               |            |               |    |     |     |       |        |                           |    |      |
|------------------------------|-------|------|---------------|------------|---------------|----|-----|-----|-------|--------|---------------------------|----|------|
| TCGA-44-5643-01A-01R-1628-07 | Tumor | LUAD | Not Available | Stage IIIA | M0            | N2 | T2b | Yes | Alive | MALE   | BLACK OR AFRICAN AMERICAN | 53 | 1013 |
| TCGA-44-5644-01A-21R-2039-07 | Tumor | LUAD | Not Available | Stage IB   | Not Available | N0 | T2a | Yes | Alive | FEMALE | WHITE                     | 51 | 863  |
| TCGA-44-5645-01A-01R-1628-07 | Tumor | LUAD | Not Available | Stage IA   | Not Available | NX | T1  | Yes | Alive | FEMALE | BLACK OR AFRICAN AMERICAN | 61 | 852  |
| TCGA-44-5645-01A-01R-A278-07 | Tumor | LUAD | Not Available | Stage IA   | Not Available | NX | T1  | Yes | Alive | FEMALE | BLACK OR AFRICAN AMERICAN | 61 | 852  |

|                              |        |      |               |          |               |    |     |     |       |        |                           |    |     |
|------------------------------|--------|------|---------------|----------|---------------|----|-----|-----|-------|--------|---------------------------|----|-----|
| TCGA-44-5645-01B-04R-A277-07 | Tumor  | LUAD | Not Available | Stage IA | Not Available | NX | T1  | Yes | Alive | FEMALE | BLACK OR AFRICAN AMERICAN | 61 | 852 |
| TCGA-44-5645-11A-01R-1628-07 | Normal | LUAD | Not Available | Stage IA | Not Available | NX | T1  | Yes | Alive | FEMALE | BLACK OR AFRICAN AMERICAN | 61 | 852 |
| TCGA-44-6144-11A-01R-1755-07 | Normal | LUAD | RX            | Stage IA | M0            | N0 | T1a | Yes | Alive | MALE   | WHITE                     | 58 | 723 |
| TCGA-44-6145-01A-11R-1755-07 | Tumor  | LUAD | Not Available | Stage IA | M0            | N0 | T1  | Yes | Alive | FEMALE | WHITE                     | 62 | 595 |
| TCGA-44-6145-11A-01R-1858-07 | Normal | LUAD | Not Available | Stage IA | M0            | N0 | T1  | Yes | Alive | FEMALE | WHITE                     | 62 | 595 |

|                              |        |      |               |           |    |    |     |     |       |        |       |    |     |
|------------------------------|--------|------|---------------|-----------|----|----|-----|-----|-------|--------|-------|----|-----|
| TCGA-44-6146-01A-11R-1755-07 | Tumor  | LUAD | Not Available | Stage IIB | M0 | N0 | T3  | Yes | Alive | MALE   | WHITE | 64 | 728 |
| TCGA-44-6146-01A-11R-A278-07 | Tumor  | LUAD | Not Available | Stage IIB | M0 | N0 | T3  | Yes | Alive | MALE   | WHITE | 64 | 728 |
| TCGA-44-6146-01B-04R-A277-07 | Tumor  | LUAD | Not Available | Stage IIB | M0 | N0 | T3  | Yes | Alive | MALE   | WHITE | 64 | 728 |
| TCGA-44-6146-11A-01R-1858-07 | Normal | LUAD | Not Available | Stage IIB | M0 | N0 | T3  | Yes | Alive | MALE   | WHITE | 64 | 728 |
| TCGA-44-6147-01A-11R-1755-07 | Tumor  | LUAD | Not Available | Stage IA  | M0 | NX | T1b | Yes | Alive | FEMALE | WHITE | 67 | 845 |
| TCGA-44-6147-01A-11R-A278-07 | Tumor  | LUAD | Not Available | Stage IA  | M0 | NX | T1b | Yes | Alive | FEMALE | WHITE | 67 | 845 |
| TCGA-44-6147-01B-06R-A277-07 | Tumor  | LUAD | Not Available | Stage IA  | M0 | NX | T1b | Yes | Alive | FEMALE | WHITE | 67 | 845 |



|                              |        |      |               |            |    |    |     |     |       |        |       |    |     |
|------------------------------|--------|------|---------------|------------|----|----|-----|-----|-------|--------|-------|----|-----|
| TCGA-44-6147-11A-01R-1858-07 | Normal | LUAD | Not Available | Stage IA   | M0 | NX | T1b | Yes | Alive | FEMALE | WHITE | 67 | 845 |
| TCGA-44-6148-01A-11R-1755-07 | Tumor  | LUAD | RX            | Stage IA   | M0 | N0 | T1b | Yes | Alive | MALE   | WHITE | 60 | 704 |
| TCGA-44-6148-11A-01R-1858-07 | Normal | LUAD | RX            | Stage IA   | M0 | N0 | T1b | Yes | Alive | MALE   | WHITE | 60 | 704 |
| TCGA-44-6774-01A-21R-1858-07 | Tumor  | LUAD | Not Available | Stage IIIA | M0 | N2 | T1  | Yes | Alive | FEMALE | WHITE | 56 | 658 |
| TCGA-44-6775-01A-11R-1858-07 | Tumor  | LUAD | RX            | Stage IB   | MX | N0 | T2a | Yes | Alive | FEMALE | WHITE | 72 | 705 |
| TCGA-44-6775-01A-11R-A278-07 | Tumor  | LUAD | RX            | Stage IB   | MX | N0 | T2a | Yes | Alive | FEMALE | WHITE | 72 | 705 |
| TCGA-44-6775-01C-02R-A277-07 | Tumor  | LUAD | RX            | Stage IB   | MX | N0 | T2a | Yes | Alive | FEMALE | WHITE | 72 | 705 |

|                              |        |      |               |          |    |    |    |     |       |        |                           |    |      |
|------------------------------|--------|------|---------------|----------|----|----|----|-----|-------|--------|---------------------------|----|------|
| TCGA-44-6776-01A-11R-1858-07 | Tumor  | LUAD | Not Available | Stage IA | MX | N0 | T1 | Yes | Alive | FEMALE | WHITE                     | 60 | 2616 |
| TCGA-44-6776-11A-01R-1858-07 | Normal | LUAD | Not Available | Stage IA | MX | N0 | T1 | Yes | Alive | FEMALE | WHITE                     | 60 | 2616 |
| TCGA-44-6777-01A-11R-1858-07 | Tumor  | LUAD | Not Available | Stage IB | MX | NX | T2 | Yes | Dead  | FEMALE | WHITE                     | 85 | 987  |
| TCGA-44-6777-11A-01R-1858-07 | Normal | LUAD | Not Available | Stage IB | MX | NX | T2 | Yes | Dead  | FEMALE | WHITE                     | 85 | 987  |
| TCGA-44-6778-01A-11R-1858-07 | Tumor  | LUAD | Not Available | Stage IA | MX | N0 | T1 | Yes | Alive | MALE   | BLACK OR AFRICAN AMERICAN | 59 | 1864 |

|                              |        |      |               |           |    |    |     |     |       |        |                           |    |      |
|------------------------------|--------|------|---------------|-----------|----|----|-----|-----|-------|--------|---------------------------|----|------|
| TCGA-44-6778-11A-01R-1858-07 | Normal | LUAD | Not Available | Stage IA  | MX | N0 | T1  | Yes | Alive | MALE   | BLACK OR AFRICAN AMERICAN | 59 | 1864 |
| TCGA-44-6779-01A-11R-1858-07 | Tumor  | LUAD | Not Available | Stage IIB | MX | N1 | T2  | Yes | Dead  | FEMALE | WHITE                     | 50 | 500  |
| TCGA-44-7659-01A-11R-2066-07 | Tumor  | LUAD | Not Available | Stage IA  | MX | N0 | T1b | Yes | Alive | MALE   | WHITE                     | 70 | 691  |
| TCGA-44-7660-01A-11R-2066-07 | Tumor  | LUAD | Not Available | Stage IB  | MX | N0 | T2  | Yes | Alive | MALE   | WHITE                     | 72 | 592  |
| TCGA-44-7661-01A-11R-2066-07 | Tumor  | LUAD | Not Available | Stage IB  | M0 | N0 | T2a | Yes | Alive | FEMALE | WHITE                     | 69 | 557  |
| TCGA-44-7662-01A-11R-2066-07 | Tumor  | LUAD | Not Available | Stage IB  | MX | N0 | T2a | Yes | Alive | MALE   | WHITE                     | 61 | 218  |

|                              |       |      |               |           |    |    |     |     |       |        |                           |    |      |
|------------------------------|-------|------|---------------|-----------|----|----|-----|-----|-------|--------|---------------------------|----|------|
| TCGA-44-7667-01A-31R-2066-07 | Tumor | LUAD | Not Available | Stage IIB | MX | N0 | T3  | Yes | Alive | FEMALE | WHITE                     | 49 | 1097 |
| TCGA-44-7669-01A-21R-2066-07 | Tumor | LUAD | Not Available | Stage IIA | MX | N1 | T1b | Yes | Dead  | MALE   | BLACK OR AFRICAN AMERICAN | 59 | 574  |
| TCGA-44-7670-01A-11R-2066-07 | Tumor | LUAD | Not Available | Stage IIA | M0 | N1 | T1b | Yes | Alive | FEMALE | WHITE                     | 47 | 882  |
| TCGA-44-7671-01A-11R-2066-07 | Tumor | LUAD | Not Available | Stage IB  | M0 | N0 | T2a | Yes | Alive | MALE   | BLACK OR AFRICAN AMERICAN | 64 | 889  |
| TCGA-44-7672-01A-11R-2066-07 | Tumor | LUAD | Not Available | Stage IA  | M0 | N0 | T1b | Yes | Alive | FEMALE | WHITE                     | 52 | 719  |

|                              |       |      |               |           |    |    |     |     |       |        |                           |    |     |
|------------------------------|-------|------|---------------|-----------|----|----|-----|-----|-------|--------|---------------------------|----|-----|
| TCGA-44-8117-01A-11R-2241-07 | Tumor | LUAD | Not Available | Stage IB  | M0 | N0 | T2a | Yes | Alive | FEMALE | WHITE                     | 54 | 385 |
| TCGA-44-8119-01A-11R-2241-07 | Tumor | LUAD | Not Available | Stage IIB | M0 | N0 | T3  | Yes | Alive | MALE   | WHITE                     | 73 | 285 |
| TCGA-44-8120-01A-11R-2241-07 | Tumor | LUAD | Not Available | Stage IB  | M0 | N0 | T2a | Yes | Alive | MALE   | BLACK OR AFRICAN AMERICAN | 58 | 260 |
| TCGA-44-A479-01A-31R-A24H-07 | Tumor | LUAD | R0            | Stage IB  | MX | N0 | T2  | Yes | Alive | FEMALE | BLACK OR AFRICAN AMERICAN | 73 | 486 |
| TCGA-44-A47A-01A-21R-A24H-07 | Tumor | LUAD | R0            | Stage IB  | MX | N0 | T2a | Yes | Alive | FEMALE | WHITE                     | 78 | 466 |

|                                      |       |      |                  |          |    |    |     |     |       |        |       |    |      |
|--------------------------------------|-------|------|------------------|----------|----|----|-----|-----|-------|--------|-------|----|------|
| TCGA-44-<br>A47B-01A-11R-<br>A24H-07 | Tumor | LUAD | R0               | Stage IB | M0 | N0 | T2a | Yes | Alive | MALE   | WHITE | 79 | 287  |
| TCGA-44-<br>A47G-01A-<br>21R-A24H-07 | Tumor | LUAD | R0               | Stage IA | M0 | N0 | T1  | Yes | Alive | FEMALE | WHITE | 73 | 351  |
| TCGA-44-<br>A4SS-01A-<br>11R-A24X-07 | Tumor | LUAD | Not<br>Available | Stage IA | M0 | N0 | T1b | Yes | Alive | MALE   | WHITE | 73 | 415  |
| TCGA-44-<br>A4SU-01A-<br>11R-A24X-07 | Tumor | LUAD | R0               | Stage IA | MX | N0 | T1a | Yes | Alive | FEMALE | WHITE | 67 | 409  |
| TCGA-49-<br>4486-01A-01R-<br>1206-07 | Tumor | LUAD | R0               | Stage IA | M0 | N0 | T1  | Yes | Dead  | MALE   | WHITE | 72 | 2318 |
| TCGA-49-<br>4487-01A-21R-<br>1858-07 | Tumor | LUAD | R0               | Stage IA | M0 | N0 | T1  | Yes | Dead  | FEMALE | WHITE | 72 | 855  |
| TCGA-49-<br>4488-01A-01R-<br>1755-07 | Tumor | LUAD | R0               | Stage IA | MX | N0 | T1  | Yes | Dead  | FEMALE | WHITE | 74 | 869  |

|                              |        |      |               |            |    |    |    |     |      |        |       |    |      |
|------------------------------|--------|------|---------------|------------|----|----|----|-----|------|--------|-------|----|------|
| TCGA-49-4490-01A-21R-1858-07 | Tumor  | LUAD | Not Available | Stage IIIA | M0 | N2 | T3 | Yes | Dead | FEMALE | WHITE | 45 | 385  |
| TCGA-49-4490-11A-01R-1858-07 | Normal | LUAD | Not Available | Stage IIIA | M0 | N2 | T3 | Yes | Dead | FEMALE | WHITE | 45 | 385  |
| TCGA-49-4494-01A-01R-1206-07 | Tumor  | LUAD | R0            | Stage IIIA | M0 | N2 | T3 | Yes | Dead | MALE   | WHITE | 77 | 1081 |
| TCGA-49-4501-01A-01R-1206-07 | Tumor  | LUAD | R0            | Stage IB   | M0 | N0 | T2 | No  | Dead | FEMALE | WHITE | 67 | 1421 |
| TCGA-49-4505-01A-01R-1206-07 | Tumor  | LUAD | R0            | Stage IIB  | M0 | N1 | T2 | Yes | Dead | FEMALE | WHITE | 61 | 428  |
| TCGA-49-4506-01A-01R-1206-07 | Tumor  | LUAD | R1            | Stage IIB  | M0 | N1 | T2 | Yes | Dead | FEMALE | WHITE | 68 | 999  |
| TCGA-49-4507-01A-01R-1206-07 | Tumor  | LUAD | R0            | Stage IIIA | M0 | N1 | T3 | Yes | Dead | FEMALE | WHITE | 73 | 268  |

|                              |        |      |    |            |    |    |     |     |       |        |                           |    |      |
|------------------------------|--------|------|----|------------|----|----|-----|-----|-------|--------|---------------------------|----|------|
| TCGA-49-4510-01A-01R-1206-07 | Tumor  | LUAD | R0 | Stage IIB  | M0 | N1 | T2  | Yes | Dead  | FEMALE | BLACK OR AFRICAN AMERICAN | 51 | 896  |
| TCGA-49-4512-01A-21R-1858-07 | Tumor  | LUAD | R1 | Stage IIIA | MX | N2 | T2  | No  | Dead  | FEMALE | WHITE                     | 69 | 905  |
| TCGA-49-4512-11A-01R-1858-07 | Normal | LUAD | R1 | Stage IIIA | MX | N2 | T2  | No  | Dead  | FEMALE | WHITE                     | 69 | 905  |
| TCGA-49-4514-01A-21R-1858-07 | Tumor  | LUAD | R0 | Stage IA   | M0 | N0 | T1  | Yes | Alive | FEMALE | WHITE                     | 79 | 1700 |
| TCGA-49-6742-01A-11R-1858-07 | Tumor  | LUAD | R0 | Stage IIA  | M0 | N1 | T2a | Yes | Alive | MALE   | WHITE                     | 70 | 488  |
| TCGA-49-6742-11A-01R-1858-07 | Normal | LUAD | R0 | Stage IIA  | M0 | N1 | T2a | Yes | Alive | MALE   | WHITE                     | 70 | 488  |



|                              |        |      |               |            |    |    |     |     |       |        |       |    |      |
|------------------------------|--------|------|---------------|------------|----|----|-----|-----|-------|--------|-------|----|------|
| TCGA-49-6743-01A-11R-1858-07 | Tumor  | LUAD | Not Available | Stage IIIA | MX | N2 | T1  | Yes | Alive | FEMALE | WHITE | 81 | 1621 |
| TCGA-49-6743-11A-01R-1858-07 | Normal | LUAD | Not Available | Stage IIIA | MX | N2 | T1  | Yes | Alive | FEMALE | WHITE | 81 | 1621 |
| TCGA-49-6744-01A-11R-1858-07 | Tumor  | LUAD | R0            | Stage IIA  | MX | N1 | T2a | Yes | Alive | FEMALE | WHITE | 64 | 1683 |
| TCGA-49-6744-11A-01R-1858-07 | Normal | LUAD | R0            | Stage IIA  | MX | N1 | T2a | Yes | Alive | FEMALE | WHITE | 64 | 1683 |
| TCGA-49-6745-01A-11R-1858-07 | Tumor  | LUAD | Not Available | Stage IIIA | M0 | N2 | T2a | Yes | Alive | MALE   | WHITE | 82 | 522  |
| TCGA-49-6745-11A-01R-1858-07 | Normal | LUAD | Not Available | Stage IIIA | M0 | N2 | T2a | Yes | Alive | MALE   | WHITE | 82 | 522  |
| TCGA-49-6761-01A-31R-1949-07 | Tumor  | LUAD | R0            | Stage IIIA | MX | N2 | T1  | Yes | Alive | FEMALE | WHITE | 68 | 354  |

|                              |        |      |    |            |    |    |    |     |       |        |                           |    |      |
|------------------------------|--------|------|----|------------|----|----|----|-----|-------|--------|---------------------------|----|------|
| TCGA-49-6761-11A-01R-1949-07 | Normal | LUAD | R0 | Stage IIIA | MX | N2 | T1 | Yes | Alive | FEMALE | WHITE                     | 68 | 354  |
| TCGA-49-6767-01A-11R-1858-07 | Tumor  | LUAD | R0 | Stage IIB  | MX | N0 | T3 | Yes | Alive | FEMALE | WHITE                     | 46 | 677  |
| TCGA-49-AAQV-01A-11R-A39D-07 | Tumor  | LUAD | R0 | Stage II   | MX | N1 | T1 | No  | Dead  | FEMALE | BLACK OR AFRICAN AMERICAN | 63 | 677  |
| TCGA-49-AAR0-01A-21R-A39D-07 | Tumor  | LUAD | R0 | Stage IA   | MX | N0 | T1 | Yes | Alive | MALE   | BLACK OR AFRICAN AMERICAN | 57 | 4765 |

|                                      |       |      |    |            |    |    |    |         |       |      |                              |    |    |      |
|--------------------------------------|-------|------|----|------------|----|----|----|---------|-------|------|------------------------------|----|----|------|
| TCGA-49-<br>AAR2-01A-<br>11R-A39D-07 | Tumor | LUAD | R0 | Stage IB   | MX | N0 | T2 | Yes     | Alive | MALE | BLACK<br>AFRICAN<br>AMERICAN | OR | 64 | 2224 |
| TCGA-49-<br>AAR3-01A-<br>11R-A41B-07 | Tumor | LUAD | R0 | Stage IIB  | MX | N1 | T2 | Unknown | Alive | MALE | BLACK<br>AFRICAN<br>AMERICAN | OR | 69 | 1893 |
| TCGA-49-<br>AAR4-01A-<br>12R-A41B-07 | Tumor | LUAD | R0 | Stage IIIA | MX | N2 | T2 | Yes     | Dead  | MALE | BLACK<br>AFRICAN<br>AMERICAN | OR | 51 | 879  |

|                                      |       |      |    |           |    |    |    |     |      |        |                              |    |    |      |
|--------------------------------------|-------|------|----|-----------|----|----|----|-----|------|--------|------------------------------|----|----|------|
| TCGA-49-<br>AAR9-01A-<br>21R-A41B-07 | Tumor | LUAD | R0 | Stage IIB | MX | N0 | T3 | Yes | Dead | MALE   | BLACK<br>AFRICAN<br>AMERICAN | OR | 61 | 260  |
| TCGA-49-<br>AARE-01A-<br>11R-A41B-07 | Tumor | LUAD | R0 | Stage IA  | MX | N0 | T1 | Yes | Dead | FEMALE | BLACK<br>AFRICAN<br>AMERICAN | OR | 51 | 1229 |
| TCGA-49-<br>AARN-01A-<br>21R-A41B-07 | Tumor | LUAD | R0 | Stage IA  | MX | N0 | T1 | Yes | Dead | FEMALE | BLACK<br>AFRICAN<br>AMERICAN | OR | 56 | 1135 |

|                                      |       |      |    |          |    |    |     |     |       |        |                              |    |    |      |
|--------------------------------------|-------|------|----|----------|----|----|-----|-----|-------|--------|------------------------------|----|----|------|
| TCGA-49-<br>AARO-01A-<br>12R-A41B-07 | Tumor | LUAD | R0 | Stage IA | MX | N0 | T1a | Yes | Alive | FEMALE | BLACK<br>AFRICAN<br>AMERICAN | OR | 39 | 3759 |
| TCGA-49-<br>AARQ-01A-<br>11R-A41B-07 | Tumor | LUAD | R0 | Stage I  | MX | N0 | T2  | Yes | Alive | FEMALE | BLACK<br>AFRICAN<br>AMERICAN | OR | 41 | 6732 |
| TCGA-49-<br>AARR-01A-<br>11R-A41B-07 | Tumor | LUAD | R0 | Stage IA | MX | N0 | T1  | Yes | Alive | MALE   | BLACK<br>AFRICAN<br>AMERICAN | OR | 68 | 4992 |

|                                      |       |      |                  |             |    |    |     |                  |       |        |                                    |    |      |
|--------------------------------------|-------|------|------------------|-------------|----|----|-----|------------------|-------|--------|------------------------------------|----|------|
| TCGA-4B-<br>A93V-01A-11R-<br>A39D-07 | Tumor | LUAD | R0               | Stage IA    | M0 | N0 | T1b | Yes              | Alive | FEMALE | BLACK<br>OR<br>AFRICAN<br>AMERICAN | 52 | 300  |
| TCGA-50-<br>5044-01A-21R-<br>1858-07 | Tumor | LUAD | Not<br>Available | Stage IIIB  | M0 | N1 | T4  | Not<br>Available | Dead  | FEMALE | WHITE                              | 72 | 624  |
| TCGA-50-<br>5045-01A-01R-<br>1628-07 | Tumor | LUAD | Not<br>Available | Discrepancy | M0 | N1 | T2  | Not<br>Available | Dead  | FEMALE | BLACK<br>OR<br>AFRICAN<br>AMERICAN | 57 | 2174 |
| TCGA-50-<br>5049-01A-01R-<br>1628-07 | Tumor | LUAD | Not<br>Available | Stage IA    | M0 | N0 | T2  | Not<br>Available | Alive | MALE   | WHITE                              | 70 | 3094 |
| TCGA-50-<br>5051-01A-21R-<br>1858-07 | Tumor | LUAD | R0               | Stage IIIA  | M0 | N2 | T2  | Yes              | Alive | FEMALE | WHITE                              | 42 | 478  |

|                              |       |      |               |            |    |    |    |               |       |        |                           |    |      |
|------------------------------|-------|------|---------------|------------|----|----|----|---------------|-------|--------|---------------------------|----|------|
| TCGA-50-5055-01A-01R-1628-07 | Tumor | LUAD | R0            | Stage IIA  | M0 | N1 | T1 | Not Available | Alive | FEMALE | WHITE                     | 79 | 1830 |
| TCGA-50-5066-01A-01R-1628-07 | Tumor | LUAD | R0            | Stage IB   | M0 | N0 | T2 | No            | Alive | MALE   | BLACK OR AFRICAN AMERICAN | 72 | 1442 |
| TCGA-50-5066-02A-11R-2090-07 | Tumor | LUAD | R0            | Stage IB   | M0 | N0 | T2 | No            | Alive | MALE   | BLACK OR AFRICAN AMERICAN | 72 | 1442 |
| TCGA-50-5068-01A-01R-1628-07 | Tumor | LUAD | Not Available | Stage IIB  | MX | N1 | T2 | Not Available | Dead  | FEMALE | WHITE                     | 59 | 1499 |
| TCGA-50-5072-01A-21R-1858-07 | Tumor | LUAD | Not Available | Stage IIIA | M0 | N2 | T2 | Yes           | Alive | MALE   | WHITE                     | 74 | 250  |

|                              |        |      |               |            |    |    |    |               |      |        |       |    |      |
|------------------------------|--------|------|---------------|------------|----|----|----|---------------|------|--------|-------|----|------|
| TCGA-50-5930-01A-11R-1755-07 | Tumor  | LUAD | Not Available | Stage IIIA | M0 | N2 | T2 | Not Available | Dead | MALE   | WHITE | 47 | 282  |
| TCGA-50-5930-11A-01R-1755-07 | Normal | LUAD | Not Available | Stage IIIA | M0 | N2 | T2 | Not Available | Dead | MALE   | WHITE | 47 | 282  |
| TCGA-50-5931-01A-11R-1755-07 | Tumor  | LUAD | R0            | Stage IB   | M0 | N0 | T2 | Yes           | Dead | FEMALE | WHITE | 75 | 434  |
| TCGA-50-5931-11A-01R-1858-07 | Normal | LUAD | R0            | Stage IB   | M0 | N0 | T2 | Yes           | Dead | FEMALE | WHITE | 75 | 434  |
| TCGA-50-5932-01A-11R-1755-07 | Tumor  | LUAD | Not Available | Stage IIB  | M0 | N1 | T2 | Not Available | Dead | MALE   | WHITE | 75 | 1235 |
| TCGA-50-5932-11A-01R-1755-07 | Normal | LUAD | Not Available | Stage IIB  | M0 | N1 | T2 | Not Available | Dead | MALE   | WHITE | 75 | 1235 |
| TCGA-50-5933-01A-11R-1755-07 | Tumor  | LUAD | Not Available | Stage IIIB | M0 | N2 | T4 | Not Available | Dead | MALE   | WHITE | 72 | 2393 |



|                              |        |      |               |            |    |    |    |               |      |        |       |    |      |
|------------------------------|--------|------|---------------|------------|----|----|----|---------------|------|--------|-------|----|------|
| TCGA-50-5933-11A-01R-1755-07 | Normal | LUAD | Not Available | Stage IIIB | M0 | N2 | T4 | Not Available | Dead | MALE   | WHITE | 72 | 2393 |
| TCGA-50-5935-01A-11R-1755-07 | Tumor  | LUAD | Not Available | Stage IA   | M0 | N0 | T1 | Not Available | Dead | FEMALE | WHITE | 86 | 653  |
| TCGA-50-5935-11A-01R-1858-07 | Normal | LUAD | Not Available | Stage IA   | M0 | N0 | T1 | Not Available | Dead | FEMALE | WHITE | 86 | 653  |
| TCGA-50-5936-01A-11R-1628-07 | Tumor  | LUAD | Not Available | Stage IIIA | M0 | N2 | T2 | Not Available | Dead | MALE   | WHITE | 58 | 257  |
| TCGA-50-5936-11A-01R-1628-07 | Normal | LUAD | Not Available | Stage IIIA | M0 | N2 | T2 | Not Available | Dead | MALE   | WHITE | 58 | 257  |
| TCGA-50-5939-01A-11R-1628-07 | Tumor  | LUAD | Not Available | Stage IB   | M0 | N0 | T2 | Yes           | Dead | MALE   | WHITE | 85 | 460  |
| TCGA-50-5939-11A-01R-1628-07 | Normal | LUAD | Not Available | Stage IB   | M0 | N0 | T2 | Yes           | Dead | MALE   | WHITE | 85 | 460  |

|                              |       |      |               |            |    |    |     |               |       |        |       |    |      |
|------------------------------|-------|------|---------------|------------|----|----|-----|---------------|-------|--------|-------|----|------|
| TCGA-50-5941-01A-11R-1755-07 | Tumor | LUAD | Not Available | Stage IIIA | M0 | N2 | T2a | Yes           | Alive | FEMALE | WHITE | 55 | 1474 |
| TCGA-50-5942-01A-21R-1755-07 | Tumor | LUAD | R0            | Stage IA   | M0 | N0 | T1  | Yes           | Alive | FEMALE | WHITE | 67 | 1847 |
| TCGA-50-5944-01A-11R-1755-07 | Tumor | LUAD | R0            | Stage IA   | M0 | N0 | T1  | Not Available | Alive | FEMALE | WHITE | 69 | 1750 |
| TCGA-50-5946-01A-11R-1755-07 | Tumor | LUAD | Not Available | Stage IA   | MX | N0 | T1  | Yes           | Alive | MALE   | WHITE | 62 | 1617 |
| TCGA-50-5946-02A-11R-2090-07 | Tumor | LUAD | Not Available | Stage IA   | MX | N0 | T1  | Yes           | Alive | MALE   | WHITE | 62 | 1617 |
| TCGA-50-6590-01A-12R-1858-07 | Tumor | LUAD | Not Available | Stage IB   | M0 | N0 | T2  | Yes           | Dead  | FEMALE | WHITE | 72 | 1288 |
| TCGA-50-6591-01A-11R-1755-07 | Tumor | LUAD | Not Available | Stage IV   | M1 | N0 | T2  | No            | Dead  | FEMALE | WHITE | 63 | 119  |

|                              |        |      |               |            |    |    |    |     |       |        |                           |    |      |
|------------------------------|--------|------|---------------|------------|----|----|----|-----|-------|--------|---------------------------|----|------|
| TCGA-50-6592-01A-11R-1755-07 | Tumor  | LUAD | Not Available | Stage IB   | M0 | N0 | T2 | Yes | Dead  | FEMALE | WHITE                     | 71 | 777  |
| TCGA-50-6593-01A-11R-1755-07 | Tumor  | LUAD | R0            | Stage IIIA | M0 | N2 | T1 | Yes | Dead  | FEMALE | WHITE                     | 49 | 336  |
| TCGA-50-6594-01A-11R-1755-07 | Tumor  | LUAD | Not Available | Stage IIIA | M0 | N2 | T3 | Yes | Dead  | FEMALE | BLACK OR AFRICAN AMERICAN | 79 | 370  |
| TCGA-50-6595-01A-12R-1858-07 | Tumor  | LUAD | Not Available | Stage IIIA | M0 | N2 | T2 | Yes | Dead  | FEMALE | WHITE                     | 74 | 189  |
| TCGA-50-6595-11A-01R-1858-07 | Normal | LUAD | Not Available | Stage IIIA | M0 | N2 | T2 | Yes | Dead  | FEMALE | WHITE                     | 74 | 189  |
| TCGA-50-6597-01A-11R-1858-07 | Tumor  | LUAD | R0            | Stage IB   | M0 | N0 | T2 | No  | Alive | FEMALE | WHITE                     | 79 | 1268 |

|                              |       |      |               |           |    |    |     |         |       |        |                           |    |      |
|------------------------------|-------|------|---------------|-----------|----|----|-----|---------|-------|--------|---------------------------|----|------|
| TCGA-50-6673-01A-11R-1949-07 | Tumor | LUAD | R0            | Stage I   | M0 | N0 | T1  | No      | Dead  | FEMALE | WHITE                     | 84 | 22   |
| TCGA-50-7109-01A-11R-2039-07 | Tumor | LUAD | Not Available | Stage IA  | M0 | N0 | T1  | Yes     | Alive | MALE   | WHITE                     | 60 | 308  |
| TCGA-50-8457-01A-11R-2326-07 | Tumor | LUAD | Not Available | Stage IA  | M0 | N0 | T1a | Yes     | Alive | FEMALE | BLACK OR AFRICAN AMERICAN | 63 | 1125 |
| TCGA-50-8459-01A-11R-2326-07 | Tumor | LUAD | Not Available | Stage IIB | M0 | N0 | T3  | Yes     | Alive | MALE   | WHITE                     | 68 | 1119 |
| TCGA-50-8460-01A-11R-2326-07 | Tumor | LUAD | R0            | Stage IA  | M0 | N0 | T1a | Unknown | Alive | MALE   | WHITE                     | 74 | 829  |
| TCGA-53-7624-01A-11R-2066-07 | Tumor | LUAD | R0            | Stage IV  | M1 | N0 | T2  | Yes     | Dead  | FEMALE | WHITE                     | 40 | 1043 |

|                              |       |      |               |             |    |    |     |     |       |        |       |    |      |
|------------------------------|-------|------|---------------|-------------|----|----|-----|-----|-------|--------|-------|----|------|
| TCGA-53-7626-01A-12R-2066-07 | Tumor | LUAD | R0            | Stage IIA   | M0 | N1 | T1  | Yes | Dead  | FEMALE | WHITE | 76 | 929  |
| TCGA-53-7813-01A-11R-2170-07 | Tumor | LUAD | Not Available | Stage IIIB  | M0 | N0 | T4  | Yes | Alive | FEMALE | WHITE | 51 | 424  |
| TCGA-53-A4EZ-01A-12R-A24X-07 | Tumor | LUAD | RX            | Stage IIA   | MX | N1 | T2a | Yes | Alive | MALE   | WHITE | 63 | 1071 |
| TCGA-55-1592-01A-01R-0946-07 | Tumor | LUAD | R0            | Stage IA    | M0 | N0 | T2  | Yes | Dead  | MALE   | WHITE | 65 | 701  |
| TCGA-55-1594-01A-01R-0946-07 | Tumor | LUAD | R0            | Stage IIIA  | M0 | N2 | T2  | Yes | Alive | MALE   | WHITE | 68 | 1178 |
| TCGA-55-1596-01A-01R-0946-07 | Tumor | LUAD | R0            | Stage IIB   | M0 | N1 | T2  | Yes | Alive | MALE   | ASIAN | 55 | 2065 |
| TCGA-55-5899-01A-11R-1628-07 | Tumor | LUAD | R0            | Discrepancy | M0 | N1 | T1a | Yes | Alive | MALE   | WHITE | 58 | 930  |

|                              |        |      |               |            |    |    |     |     |       |        |       |    |      |
|------------------------------|--------|------|---------------|------------|----|----|-----|-----|-------|--------|-------|----|------|
| TCGA-55-6543-01A-11R-1755-07 | Tumor  | LUAD | Not Available | Stage IA   | MX | N0 | T1b | Yes | Alive | FEMALE | WHITE | 60 | 435  |
| TCGA-55-6642-01A-11R-1858-07 | Tumor  | LUAD | R0            | Stage IB   | MX | N0 | T2  | Yes | Alive | MALE   | WHITE | 63 | 2449 |
| TCGA-55-6712-01A-11R-1858-07 | Tumor  | LUAD | R1            | Stage IIA  | MX | N1 | T2a | Yes | Alive | MALE   | WHITE | 71 | 171  |
| TCGA-55-6968-01A-11R-1949-07 | Tumor  | LUAD | Not Available | Stage IV   | M1 | N0 | T1  | Yes | Dead  | MALE   | WHITE | 61 | 1293 |
| TCGA-55-6968-11A-01R-1949-07 | Normal | LUAD | Not Available | Stage IV   | M1 | N0 | T1  | Yes | Dead  | MALE   | WHITE | 61 | 1293 |
| TCGA-55-6969-11A-01R-1949-07 | Normal | LUAD | Not Available | Stage IB   | M0 | N0 | T2  | Yes | Alive | MALE   | WHITE | 52 | 1239 |
| TCGA-55-6970-01A-11R-1949-07 | Tumor  | LUAD | R1            | Stage IIIA | MX | N2 | T2  | Yes | Dead  | FEMALE | WHITE | 67 | 464  |

|                              |        |      |               |            |    |    |    |     |       |        |       |    |      |
|------------------------------|--------|------|---------------|------------|----|----|----|-----|-------|--------|-------|----|------|
| TCGA-55-6970-11A-01R-1949-07 | Normal | LUAD | R1            | Stage IIIA | MX | N2 | T2 | Yes | Dead  | FEMALE | WHITE | 67 | 464  |
| TCGA-55-6971-01A-11R-1949-07 | Tumor  | LUAD | R0            | Stage IB   | MX | N0 | T2 | Yes | Alive | FEMALE | WHITE | 59 | 1400 |
| TCGA-55-6971-11A-01R-1949-07 | Normal | LUAD | R0            | Stage IB   | MX | N0 | T2 | Yes | Alive | FEMALE | WHITE | 59 | 1400 |
| TCGA-55-6972-01A-11R-1949-07 | Tumor  | LUAD | R0            | Stage IB   | M0 | N0 | T2 | Yes | Alive | MALE   | WHITE | 72 | 1632 |
| TCGA-55-6972-11A-01R-1949-07 | Normal | LUAD | R0            | Stage IB   | M0 | N0 | T2 | Yes | Alive | MALE   | WHITE | 72 | 1632 |
| TCGA-55-6975-01A-11R-1949-07 | Tumor  | LUAD | Not Available | Stage IIB  | M0 | N1 | T2 | Yes | Dead  | MALE   | WHITE | 61 | 118  |
| TCGA-55-6975-11A-01R-1949-07 | Normal | LUAD | Not Available | Stage IIB  | M0 | N1 | T2 | Yes | Dead  | MALE   | WHITE | 61 | 118  |

|                              |        |      |               |            |    |    |     |     |       |        |       |    |      |
|------------------------------|--------|------|---------------|------------|----|----|-----|-----|-------|--------|-------|----|------|
| TCGA-55-6978-01A-11R-1949-07 | Tumor  | LUAD | Not Available | Stage IIA  | MX | N0 | T2b | No  | Dead  | MALE   | WHITE | 81 | 176  |
| TCGA-55-6978-11A-01R-1949-07 | Normal | LUAD | Not Available | Stage IIA  | MX | N0 | T2b | No  | Dead  | MALE   | WHITE | 81 | 176  |
| TCGA-55-6979-01A-11R-1949-07 | Tumor  | LUAD | Not Available | Stage IIB  | M0 | N1 | T2  | Yes | Dead  | FEMALE | WHITE | 59 | 237  |
| TCGA-55-6979-11A-01R-1949-07 | Normal | LUAD | Not Available | Stage IIB  | M0 | N1 | T2  | Yes | Dead  | FEMALE | WHITE | 59 | 237  |
| TCGA-55-6980-01A-11R-1949-07 | Tumor  | LUAD | R0            | Stage IA   | M0 | N0 | T1  | No  | Alive | MALE   | WHITE | 56 | 2109 |
| TCGA-55-6980-11A-01R-1949-07 | Normal | LUAD | R0            | Stage IA   | M0 | N0 | T1  | No  | Alive | MALE   | WHITE | 56 | 2109 |
| TCGA-55-6981-01A-11R-1949-07 | Tumor  | LUAD | R0            | Stage IIIA | M0 | N2 | T1  | Yes | Dead  | FEMALE | WHITE | 53 | 1379 |



|                              |        |      |               |            |    |    |    |               |       |        |       |    |      |
|------------------------------|--------|------|---------------|------------|----|----|----|---------------|-------|--------|-------|----|------|
| TCGA-55-6981-11A-01R-1949-07 | Normal | LUAD | R0            | Stage IIIA | M0 | N2 | T1 | Yes           | Dead  | FEMALE | WHITE | 53 | 1379 |
| TCGA-55-6982-01A-11R-1949-07 | Tumor  | LUAD | Not Available | Stage IIB  | M0 | N1 | T2 | No            | Dead  | FEMALE | WHITE | 79 | 995  |
| TCGA-55-6982-11A-01R-1949-07 | Normal | LUAD | Not Available | Stage IIB  | M0 | N1 | T2 | No            | Dead  | FEMALE | WHITE | 79 | 995  |
| TCGA-55-6983-01A-11R-1949-07 | Tumor  | LUAD | R0            | Stage IIB  | M0 | N1 | T2 | Yes           | Alive | MALE   | WHITE | 81 | 2823 |
| TCGA-55-6983-11A-01R-1949-07 | Normal | LUAD | R0            | Stage IIB  | M0 | N1 | T2 | Yes           | Alive | MALE   | WHITE | 81 | 2823 |
| TCGA-55-6984-01A-11R-1949-07 | Tumor  | LUAD | Not Available | Stage IIB  | M0 | N1 | T2 | Not Available | Dead  | FEMALE | WHITE | 71 | 760  |
| TCGA-55-6984-11A-01R-1949-07 | Normal | LUAD | Not Available | Stage IIB  | M0 | N1 | T2 | Not Available | Dead  | FEMALE | WHITE | 71 | 760  |

|                              |        |      |               |            |    |    |     |     |       |        |       |    |      |
|------------------------------|--------|------|---------------|------------|----|----|-----|-----|-------|--------|-------|----|------|
| TCGA-55-6985-01A-11R-1949-07 | Tumor  | LUAD | R0            | Stage IB   | MX | N0 | T2  | Yes | Alive | FEMALE | WHITE | 58 | 1233 |
| TCGA-55-6985-11A-01R-1949-07 | Normal | LUAD | R0            | Stage IB   | MX | N0 | T2  | Yes | Alive | FEMALE | WHITE | 58 | 1233 |
| TCGA-55-6986-01A-11R-1949-07 | Tumor  | LUAD | Not Available | Stage IB   | M0 | N0 | T2  | No  | Alive | FEMALE | WHITE | 74 | 3261 |
| TCGA-55-6986-11A-01R-1949-07 | Normal | LUAD | Not Available | Stage IB   | M0 | N0 | T2  | No  | Alive | FEMALE | WHITE | 74 | 3261 |
| TCGA-55-6987-01A-11R-1949-07 | Tumor  | LUAD | Not Available | Stage IA   | M0 | N0 | T1  | Yes | Alive | MALE   | WHITE | 77 | 2137 |
| TCGA-55-7227-01A-11R-2039-07 | Tumor  | LUAD | R0            | Stage IIIA | MX | N1 | T3  | Yes | Alive | MALE   | WHITE | 77 | 952  |
| TCGA-55-7281-01A-11R-2039-07 | Tumor  | LUAD | R0            | Stage IA   | M0 | N0 | T1b | Yes | Alive | FEMALE | WHITE | 70 | 872  |

|                              |       |      |               |            |    |    |     |     |       |        |                           |    |     |
|------------------------------|-------|------|---------------|------------|----|----|-----|-----|-------|--------|---------------------------|----|-----|
| TCGA-55-7283-01A-11R-2039-07 | Tumor | LUAD | Not Available | Stage IIIA | MX | N2 | T3  | Yes | Alive | FEMALE | WHITE                     | 76 | 609 |
| TCGA-55-7284-01B-11R-2241-07 | Tumor | LUAD | R0            | Stage IIB  | MX | N0 | T3  | Yes | Alive | MALE   | WHITE                     | 74 | 243 |
| TCGA-55-7570-01A-11R-2039-07 | Tumor | LUAD | R0            | Stage IA   | MX | N0 | T1a | Yes | Alive | MALE   | BLACK OR AFRICAN AMERICAN | 60 | 824 |
| TCGA-55-7573-01A-11R-2039-07 | Tumor | LUAD | Not Available | Stage IA   | MX | N0 | T1b | Yes | Alive | FEMALE | WHITE                     | 72 | 487 |
| TCGA-55-7574-01A-11R-2039-07 | Tumor | LUAD | R1            | Stage IB   | M0 | N0 | T2a | Yes | Alive | FEMALE | WHITE                     | 64 | 995 |

|                              |       |      |    |            |    |    |     |     |       |        |                           |    |     |
|------------------------------|-------|------|----|------------|----|----|-----|-----|-------|--------|---------------------------|----|-----|
| TCGA-55-7576-01A-11R-2066-07 | Tumor | LUAD | R0 | Stage IB   | M0 | N0 | T2a | Yes | Alive | MALE   | BLACK OR AFRICAN AMERICAN | 54 | 670 |
| TCGA-55-7724-01A-11R-2170-07 | Tumor | LUAD | R0 | Stage IB   | MX | N0 | T2a | Yes | Alive | FEMALE | WHITE                     | 76 | 705 |
| TCGA-55-7725-01A-11R-2170-07 | Tumor | LUAD | R0 | Stage IA   | MX | N0 | T1a | Yes | Alive | FEMALE | WHITE                     | 68 | 442 |
| TCGA-55-7726-01A-11R-2170-07 | Tumor | LUAD | R0 | Stage IA   | MX | N0 | T1b | Yes | Alive | FEMALE | WHITE                     | 72 | 652 |
| TCGA-55-7727-01A-11R-2170-07 | Tumor | LUAD | R0 | Stage IIIA | MX | N2 | T1a | Yes | Alive | MALE   | WHITE                     | 70 | 119 |
| TCGA-55-7728-01A-11R-2187-07 | Tumor | LUAD | R0 | Stage IB   | MX | N0 | T2a | Yes | Alive | FEMALE | WHITE                     | 64 | 704 |

|                              |       |      |               |           |    |    |     |     |       |        |                           |    |      |
|------------------------------|-------|------|---------------|-----------|----|----|-----|-----|-------|--------|---------------------------|----|------|
| TCGA-55-7815-01A-11R-2170-07 | Tumor | LUAD | R0            | Stage IB  | MX | N0 | T2a | No  | Alive | MALE   | Not Available             | 76 | 773  |
| TCGA-55-7816-01A-11R-2170-07 | Tumor | LUAD | Not Available | Stage IV  | MX | NX | TX  | No  | Alive | FEMALE | WHITE                     | 49 | 468  |
| TCGA-55-7903-01A-11R-2170-07 | Tumor | LUAD | R0            | Stage IA  | MX | N0 | T1b | Yes | Alive | MALE   | WHITE                     | 64 | 567  |
| TCGA-55-7907-01A-11R-2170-07 | Tumor | LUAD | R0            | Stage IIA | MX | N1 | T2a | Yes | Alive | MALE   | WHITE                     | 77 | 343  |
| TCGA-55-7910-01A-11R-2170-07 | Tumor | LUAD | R0            | Stage IIA | M0 | N0 | T2b | Yes | Alive | FEMALE | BLACK OR AFRICAN AMERICAN | 50 | 1040 |
| TCGA-55-7911-01A-11R-2170-07 | Tumor | LUAD | R0            | Stage IA  | MX | N0 | T1a | Yes | Alive | FEMALE | WHITE                     | 70 | 537  |

|                              |       |      |    |           |    |    |     |     |       |        |                           |    |     |
|------------------------------|-------|------|----|-----------|----|----|-----|-----|-------|--------|---------------------------|----|-----|
| TCGA-55-7913-01B-11R-2241-07 | Tumor | LUAD | R0 | Stage IA  | MX | N0 | T1b | Yes | Alive | FEMALE | BLACK OR AFRICAN AMERICAN | 61 | 561 |
| TCGA-55-7914-01A-11R-2170-07 | Tumor | LUAD | R0 | Stage IIA | MX | N1 | T1b | Yes | Alive | FEMALE | WHITE                     | 71 | 187 |
| TCGA-55-7994-01A-11R-2187-07 | Tumor | LUAD | R0 | Stage IIB | MX | N0 | T3  | Yes | Alive | MALE   | WHITE                     | 81 | 603 |
| TCGA-55-7995-01A-11R-2187-07 | Tumor | LUAD | R0 | Stage IA  | M0 | N0 | T1b | Yes | Alive | FEMALE | WHITE                     | 73 | 889 |
| TCGA-55-8085-01A-11R-2241-07 | Tumor | LUAD | R0 | Stage IA  | M0 | N0 | T1b | Yes | Alive | MALE   | WHITE                     | 64 | 904 |
| TCGA-55-8087-01A-11R-2241-07 | Tumor | LUAD | R0 | Stage IB  | MX | N0 | T2a | No  | Alive | FEMALE | WHITE                     | 59 | 462 |

|                              |       |      |               |           |     |    |     |     |       |        |       |    |     |
|------------------------------|-------|------|---------------|-----------|-----|----|-----|-----|-------|--------|-------|----|-----|
| TCGA-55-8089-01A-11R-2241-07 | Tumor | LUAD | R0            | Stage IA  | M0  | N0 | T1a | Yes | Alive | MALE   | WHITE | 56 | 702 |
| TCGA-55-8090-01A-11R-2241-07 | Tumor | LUAD | R0            | Stage IA  | M0  | N0 | T1a | Yes | Alive | MALE   | WHITE | 80 | 598 |
| TCGA-55-8091-01A-11R-2241-07 | Tumor | LUAD | R0            | Stage IB  | MX  | N0 | T2  | Yes | Alive | MALE   | WHITE | 74 | 600 |
| TCGA-55-8092-01A-11R-2241-07 | Tumor | LUAD | R0            | Stage IIB | MX  | N0 | T3  | Yes | Alive | MALE   | WHITE | 75 | 154 |
| TCGA-55-8094-01A-11R-2241-07 | Tumor | LUAD | R0            | Stage IV  | M1b | N0 | T2b | Yes | Alive | MALE   | WHITE | 51 | 541 |
| TCGA-55-8096-01A-11R-2241-07 | Tumor | LUAD | Not Available | Stage IB  | MX  | N0 | T2a | Yes | Alive | FEMALE | WHITE | 67 | 719 |
| TCGA-55-8097-01A-11R-2241-07 | Tumor | LUAD | R0            | Stage IA  | MX  | N0 | T1a | Yes | Alive | FEMALE | WHITE | 60 | 476 |

|                              |       |      |    |           |    |    |     |     |       |        |       |    |     |
|------------------------------|-------|------|----|-----------|----|----|-----|-----|-------|--------|-------|----|-----|
| TCGA-55-8203-01A-11R-2241-07 | Tumor | LUAD | R0 | Stage IA  | M0 | N0 | T1b | Yes | Alive | FEMALE | WHITE | 69 | 547 |
| TCGA-55-8204-01A-11R-2241-07 | Tumor | LUAD | R0 | Stage IB  | MX | N0 | T2a | Yes | Alive | FEMALE | WHITE | 87 | 515 |
| TCGA-55-8205-01A-11R-2241-07 | Tumor | LUAD | R0 | Stage IIA | M0 | N0 | T2b | Yes | Alive | FEMALE | WHITE | 76 | 599 |
| TCGA-55-8206-01A-11R-2241-07 | Tumor | LUAD | R0 | Stage IA  | M0 | N0 | T1b | No  | Alive | MALE   | WHITE | 56 | 888 |
| TCGA-55-8207-01A-11R-2241-07 | Tumor | LUAD | R0 | Stage IB  | MX | N0 | T2a | Yes | Alive | MALE   | WHITE | 73 | 977 |
| TCGA-55-8208-01A-11R-2241-07 | Tumor | LUAD | R0 | Stage IA  | M0 | N0 | T1b | Yes | Alive | FEMALE | WHITE | 73 | 674 |
| TCGA-55-8299-01A-11R-2287-07 | Tumor | LUAD | R0 | Stage IA  | MX | N0 | T1b | Yes | Alive | FEMALE | WHITE | 61 | 469 |



|                              |       |      |    |            |    |    |     |     |       |        |                           |    |     |
|------------------------------|-------|------|----|------------|----|----|-----|-----|-------|--------|---------------------------|----|-----|
| TCGA-55-8301-01A-11R-2287-07 | Tumor | LUAD | R0 | Stage IB   | MX | N0 | T2a | Yes | Alive | MALE   | WHITE                     | 58 | 534 |
| TCGA-55-8302-01A-11R-2326-07 | Tumor | LUAD | R0 | Stage IB   | MX | N0 | T2  | Yes | Alive | MALE   | WHITE                     | 54 | 478 |
| TCGA-55-8505-01A-11R-2403-07 | Tumor | LUAD | R0 | Stage IIIA | MX | N2 | T1a | No  | Alive | MALE   | WHITE                     | 62 | 440 |
| TCGA-55-8506-01A-11R-2403-07 | Tumor | LUAD | R0 | Stage IIB  | MX | N0 | T3  | Yes | Alive | FEMALE | WHITE                     | 62 | 11  |
| TCGA-55-8507-01A-11R-2403-07 | Tumor | LUAD | R0 | Stage IA   | MX | N0 | T1a | Yes | Alive | MALE   | WHITE                     | 53 | 418 |
| TCGA-55-8508-01A-11R-2403-07 | Tumor | LUAD | R0 | Stage IIA  | MX | N1 | T2a | Yes | Alive | FEMALE | BLACK OR AFRICAN AMERICAN | 60 | 617 |

|                              |       |      |    |           |     |    |     |     |       |        |                           |    |     |
|------------------------------|-------|------|----|-----------|-----|----|-----|-----|-------|--------|---------------------------|----|-----|
| TCGA-55-8510-01A-11R-2403-07 | Tumor | LUAD | R0 | Stage IB  | MX  | N0 | T2a | Yes | Alive | FEMALE | WHITE                     | 55 | 539 |
| TCGA-55-8511-01A-11R-2403-07 | Tumor | LUAD | R0 | Stage IB  | MX  | N0 | T2a | Yes | Alive | FEMALE | WHITE                     | 73 | 552 |
| TCGA-55-8512-01A-11R-2403-07 | Tumor | LUAD | R0 | Stage IV  | M1b | N1 | T1a | Yes | Alive | MALE   | WHITE                     | 41 | 607 |
| TCGA-55-8513-01A-11R-2403-07 | Tumor | LUAD | R0 | Stage IIB | MX  | N0 | T3  | No  | Alive | FEMALE | WHITE                     | 77 | 791 |
| TCGA-55-8514-01A-11R-2403-07 | Tumor | LUAD | R0 | Stage IB  | MX  | N0 | T2a | Yes | Alive | FEMALE | BLACK OR AFRICAN AMERICAN | 70 | 520 |
| TCGA-55-8614-01A-11R-2403-07 | Tumor | LUAD | R0 | Stage IB  | MX  | N0 | T2a | Yes | Alive | MALE   | WHITE                     | 76 | 536 |

|                              |       |      |    |            |     |    |     |     |       |        |       |    |     |
|------------------------------|-------|------|----|------------|-----|----|-----|-----|-------|--------|-------|----|-----|
| TCGA-55-8615-01A-11R-2403-07 | Tumor | LUAD | R0 | Stage IIIA | MX  | N2 | T3  | Yes | Alive | MALE   | WHITE | 67 | 446 |
| TCGA-55-8616-01A-11R-2403-07 | Tumor | LUAD | R0 | Stage IB   | M0  | N0 | T2a | Yes | Alive | FEMALE | WHITE | 58 | 48  |
| TCGA-55-8619-01A-11R-2403-07 | Tumor | LUAD | R0 | Stage IIB  | MX  | N0 | T3  | No  | Alive | FEMALE | WHITE | 72 | 416 |
| TCGA-55-8620-01A-11R-2403-07 | Tumor | LUAD | R0 | Stage IV   | M1b | N1 | T1a | Yes | Alive | MALE   | WHITE | 60 | 375 |
| TCGA-55-8621-01A-11R-2403-07 | Tumor | LUAD | R0 | Stage IA   | MX  | N0 | T1a | Yes | Alive | FEMALE | WHITE | 75 | 515 |
| TCGA-55-A48X-01A-11R-A24H-07 | Tumor | LUAD | R0 | Stage IIA  | M0  | N1 | T1b | Yes | Alive | FEMALE | WHITE | 63 | 689 |
| TCGA-55-A48Y-01A-11R-A24H-07 | Tumor | LUAD | R0 | Stage IIA  | M0  | N0 | T2b | Yes | Alive | MALE   | WHITE | 69 | 630 |

|                                      |       |      |    |            |    |    |     |     |       |        |       |    |     |
|--------------------------------------|-------|------|----|------------|----|----|-----|-----|-------|--------|-------|----|-----|
| TCGA-55-<br>A48Z-01A-12R-<br>A24X-07 | Tumor | LUAD | R0 | Stage IIIB | MX | N3 | T1a | Yes | Alive | FEMALE | WHITE | 60 | 651 |
| TCGA-55-<br>A490-01A-11R-<br>A466-07 | Tumor | LUAD | R0 | Stage IIA  | MX | N0 | T2b | Yes | Alive | MALE   | WHITE | 78 | 99  |
| TCGA-55-<br>A491-01A-11R-<br>A24H-07 | Tumor | LUAD | R0 | Stage IA   | MX | N0 | T1b | Yes | Alive | FEMALE | WHITE | 81 | 626 |
| TCGA-55-<br>A492-01A-11R-<br>A24H-07 | Tumor | LUAD | R0 | Stage IA   | MX | N0 | T1a | Yes | Alive | FEMALE | WHITE | 70 | 596 |
| TCGA-55-<br>A493-01A-11R-<br>A24H-07 | Tumor | LUAD | R0 | Stage IB   | M0 | N0 | T2a | Yes | Alive | FEMALE | WHITE | 54 | 28  |
| TCGA-55-<br>A494-01A-11R-<br>A24X-07 | Tumor | LUAD | R0 | Stage IB   | MX | N0 | T2a | Yes | Alive | FEMALE | WHITE | 61 | 481 |
| TCGA-55-<br>A4DF-01A-<br>11R-A24H-07 | Tumor | LUAD | R0 | Stage IA   | MX | N0 | T1b | Yes | Alive | MALE   | WHITE | 88 | 614 |

|                                      |       |      |    |            |    |    |     |     |       |        |                                 |    |      |
|--------------------------------------|-------|------|----|------------|----|----|-----|-----|-------|--------|---------------------------------|----|------|
| TCGA-55-<br>A4DG-01A-<br>11R-A24H-07 | Tumor | LUAD | R0 | Stage IA   | MX | N0 | T1b | Yes | Alive | MALE   | WHITE                           | 71 | 608  |
| TCGA-55-<br>A57B-01A-<br>12R-A39D-07 | Tumor | LUAD | R0 | Stage IA   | M0 | N0 | T1b | No  | Alive | FEMALE | BLACK OR<br>AFRICAN<br>AMERICAN | 80 | 546  |
| TCGA-62-<br>8394-01A-11R-<br>2326-07 | Tumor | LUAD | R0 | Stage IIIB | M0 | N2 | T4  | No  | Dead  | FEMALE | WHITE                           | 65 | 139  |
| TCGA-62-<br>8395-01A-11R-<br>2326-07 | Tumor | LUAD | R0 | Stage IIB  | M0 | N0 | T3  | No  | Alive | FEMALE | WHITE                           | 80 | 1216 |
| TCGA-62-<br>8397-01A-11R-<br>2326-07 | Tumor | LUAD | R0 | Stage IIB  | M0 | N0 | T3  | No  | Alive | FEMALE | WHITE                           | 70 | 1289 |
| TCGA-62-<br>8398-01A-11R-<br>2326-07 | Tumor | LUAD | R0 | Stage IIIA | M0 | N2 | T2  | Yes | Dead  | MALE   | WHITE                           | 55 | 444  |

|                              |       |      |    |            |    |    |    |     |       |        |       |    |      |
|------------------------------|-------|------|----|------------|----|----|----|-----|-------|--------|-------|----|------|
| TCGA-62-8399-01A-21R-2326-07 | Tumor | LUAD | R0 | Stage IIIA | M0 | N2 | T2 | Yes | Alive | MALE   | WHITE | 62 | 2696 |
| TCGA-62-8402-01A-11R-2326-07 | Tumor | LUAD | R0 | Stage IIIA | M0 | N2 | T2 | No  | Alive | FEMALE | WHITE | 73 | 1498 |
| TCGA-62-A46O-01A-11R-A24H-07 | Tumor | LUAD | R0 | Stage IB   | M0 | N0 | T2 | Yes | Dead  | FEMALE | WHITE | 65 | 1454 |
| TCGA-62-A46P-01A-11R-A24H-07 | Tumor | LUAD | R0 | Stage IB   | M0 | N0 | T2 | Yes | Dead  | MALE   | WHITE | 65 | 594  |
| TCGA-62-A46R-01A-11R-A24H-07 | Tumor | LUAD | R0 | Stage IB   | M0 | N0 | T2 | Yes | Dead  | FEMALE | WHITE | 54 | 1725 |
| TCGA-62-A46S-01A-11R-A24H-07 | Tumor | LUAD | R0 | Stage IB   | M0 | N0 | T2 | Yes | Dead  | MALE   | WHITE | 73 | 1653 |
| TCGA-62-A46V-01A-11R-A24H-07 | Tumor | LUAD | R0 | Stage IB   | M0 | N0 | T2 | Yes | Alive | FEMALE | WHITE | 78 | 2199 |

|                                      |       |      |    |             |    |    |     |     |       |        |       |    |      |
|--------------------------------------|-------|------|----|-------------|----|----|-----|-----|-------|--------|-------|----|------|
| TCGA-62-<br>A46Y-01A-11R-<br>A24H-07 | Tumor | LUAD | R0 | Stage IIIA  | M0 | N2 | T2  | No  | Dead  | FEMALE | WHITE | 70 | 414  |
| TCGA-62-<br>A470-01A-11R-<br>A24H-07 | Tumor | LUAD | R0 | Stage IB    | M0 | N0 | T2  | Yes | Dead  | MALE   | WHITE | 84 | 1194 |
| TCGA-62-<br>A471-01A-12R-<br>A24H-07 | Tumor | LUAD | R0 | Stage IIB   | M0 | N1 | T2b | Yes | Alive | MALE   | WHITE | 64 | 1246 |
| TCGA-62-<br>A472-01A-11R-<br>A24H-07 | Tumor | LUAD | R0 | Stage IIB   | M0 | N0 | T3  | Yes | Alive | MALE   | WHITE | 70 | 910  |
| TCGA-64-<br>1676-01A-01R-<br>0946-07 | Tumor | LUAD | R0 | Stage IA    | M0 | N0 | T1a | Yes | Alive | MALE   | WHITE | 58 | 1728 |
| TCGA-64-<br>1677-01A-01R-<br>0946-07 | Tumor | LUAD | R0 | Stage IIIA  | M0 | N2 | T2  | Yes | Dead  | FEMALE | WHITE | 77 | 628  |
| TCGA-64-<br>1678-01A-01R-<br>0946-07 | Tumor | LUAD | R0 | Discrepancy | M0 | N0 | T2b | Yes | Alive | FEMALE | WHITE | 70 | 1189 |

|                              |       |      |    |            |    |    |     |     |       |        |       |    |      |
|------------------------------|-------|------|----|------------|----|----|-----|-----|-------|--------|-------|----|------|
| TCGA-64-1679-01A-21R-2066-07 | Tumor | LUAD | R0 | Stage IIIA | M0 | N2 | T1  | Yes | Alive | FEMALE | WHITE | 58 | 2488 |
| TCGA-64-1680-01A-02R-0946-07 | Tumor | LUAD | R0 | Stage IV   | M1 | N2 | T2a | Yes | Alive | MALE   | WHITE | 63 | 1126 |
| TCGA-64-1681-01A-11R-2066-07 | Tumor | LUAD | R0 | Stage IA   | M0 | N0 | T1  | Yes | Dead  | FEMALE | WHITE | 61 | 1167 |
| TCGA-64-5774-01A-01R-1628-07 | Tumor | LUAD | R0 | Stage IB   | M0 | N0 | T2  | Yes | Alive | MALE   | WHITE | 60 | 2676 |
| TCGA-64-5775-01A-01R-1628-07 | Tumor | LUAD | R0 | Stage IIIA | M0 | N0 | T4  | Yes | Dead  | MALE   | WHITE | 71 | 62   |
| TCGA-64-5778-01A-01R-1628-07 | Tumor | LUAD | R0 | Stage IB   | M0 | N0 | T2  | Yes | Alive | MALE   | WHITE | 60 | 1305 |
| TCGA-64-5779-01A-01R-1628-07 | Tumor | LUAD | R0 | Stage IIIA | M0 | N2 | T2  | Yes | Alive | MALE   | WHITE | 61 | 864  |



|                              |       |      |               |           |    |    |    |     |       |        |                           |    |      |
|------------------------------|-------|------|---------------|-----------|----|----|----|-----|-------|--------|---------------------------|----|------|
| TCGA-64-5781-01A-01R-1628-07 | Tumor | LUAD | R0            | Stage IB  | M0 | N0 | T2 | Yes | Alive | FEMALE | WHITE                     | 55 | 1559 |
| TCGA-64-5815-01A-01R-1628-07 | Tumor | LUAD | R0            | Stage IIB | M0 | N1 | T2 | Yes | Alive | MALE   | WHITE                     | 74 | 866  |
| TCGA-67-3770-01A-01R-0946-07 | Tumor | LUAD | R0            | Stage IA  | M0 | N0 | T1 | Yes | Alive | FEMALE | WHITE                     | 70 | 610  |
| TCGA-67-3771-01A-01R-0946-07 | Tumor | LUAD | R0            | Stage IA  | M0 | N0 | T1 | Yes | Alive | FEMALE | BLACK OR AFRICAN AMERICAN | 77 | 610  |
| TCGA-67-3772-01A-01R-0946-07 | Tumor | LUAD | Not Available | Stage IB  | M0 | N0 | T2 | No  | Alive | FEMALE | WHITE                     | 82 | 573  |
| TCGA-67-3773-01A-01R-0946-07 | Tumor | LUAD | R0            | Stage IB  | M0 | N0 | T2 | Yes | Alive | FEMALE | WHITE                     | 84 | 427  |

|                              |       |      |               |             |    |    |     |     |       |        |       |    |     |
|------------------------------|-------|------|---------------|-------------|----|----|-----|-----|-------|--------|-------|----|-----|
| TCGA-67-3774-01A-01R-0946-07 | Tumor | LUAD | RX            | Stage IB    | M0 | N0 | T2  | Yes | Alive | FEMALE | WHITE | 73 | 385 |
| TCGA-67-4679-01B-01R-1755-07 | Tumor | LUAD | R0            | Discrepancy | M0 | N0 | T3  | Yes | Alive | MALE   | WHITE | 69 | 448 |
| TCGA-67-6215-01A-11R-1755-07 | Tumor | LUAD | R0            | Stage IB    | M0 | N0 | T2a | No  | Alive | FEMALE | WHITE | 52 | 174 |
| TCGA-67-6216-01A-11R-1755-07 | Tumor | LUAD | R0            | Stage IA    | M0 | N0 | T1a | No  | Alive | FEMALE | WHITE | 57 | 141 |
| TCGA-67-6217-01A-11R-1755-07 | Tumor | LUAD | R0            | Stage IIA   | M0 | N1 | T2a | Yes | Alive | FEMALE | WHITE | 73 | 422 |
| TCGA-69-7760-01A-11R-2170-07 | Tumor | LUAD | Not Available | Stage IIB   | M0 | N0 | T3  | No  | Alive | MALE   | WHITE | 73 | 202 |
| TCGA-69-7761-01A-11R-2170-07 | Tumor | LUAD | Not Available | Stage IB    | MX | N0 | T2a | Yes | Alive | MALE   | WHITE | 84 | 186 |

|                              |       |      |               |             |    |    |     |     |       |        |                           |    |     |
|------------------------------|-------|------|---------------|-------------|----|----|-----|-----|-------|--------|---------------------------|----|-----|
| TCGA-69-7763-01A-11R-2170-07 | Tumor | LUAD | Not Available | Stage IA    | M0 | N0 | T1b | Yes | Alive | MALE   | WHITE                     | 69 | 690 |
| TCGA-69-7764-01A-11R-2170-07 | Tumor | LUAD | Not Available | Stage IA    | M0 | N0 | T1b | Yes | Alive | MALE   | WHITE                     | 75 | 414 |
| TCGA-69-7765-01A-11R-2170-07 | Tumor | LUAD | Not Available | Discrepancy | MX | N0 | T4  | Yes | Alive | MALE   | BLACK OR AFRICAN AMERICAN | 56 | 165 |
| TCGA-69-7973-01A-11R-2187-07 | Tumor | LUAD | Not Available | Stage IB    | M0 | N0 | T2a | Yes | Alive | FEMALE | WHITE                     | 42 | 230 |
| TCGA-69-7974-01A-11R-2187-07 | Tumor | LUAD | Not Available | Stage IIIA  | MX | N2 | T2a | Yes | Alive | FEMALE | WHITE                     | 54 | 184 |
| TCGA-69-7978-01A-11R-2187-07 | Tumor | LUAD | Not Available | Stage IIB   | MX | N1 | T2b | Yes | Alive | MALE   | WHITE                     | 59 | 134 |

|                              |       |      |               |               |               |               |     |     |       |        |                           |    |     |
|------------------------------|-------|------|---------------|---------------|---------------|---------------|-----|-----|-------|--------|---------------------------|----|-----|
| TCGA-69-7979-01A-11R-2187-07 | Tumor | LUAD | Not Available | Stage IB      | MX            | N0            | T2a | Yes | Alive | FEMALE | WHITE                     | 71 | 408 |
| TCGA-69-7980-01A-11R-2187-07 | Tumor | LUAD | Not Available | Stage I       | M0            | N0            | T1b | Yes | Alive | FEMALE | WHITE                     | 70 | 411 |
| TCGA-69-8253-01A-11R-2287-07 | Tumor | LUAD | Not Available | Stage IIA     | MX            | N1            | T1a | Yes | Alive | FEMALE | BLACK OR AFRICAN AMERICAN | 59 | 426 |
| TCGA-69-8254-01A-11R-2287-07 | Tumor | LUAD | Not Available | Not Available | Not Available | Not Available | T2b | Yes | Alive | MALE   | WHITE                     | 85 | 409 |
| TCGA-69-8255-01A-11R-2287-07 | Tumor | LUAD | Not Available | Stage IA      | M0            | N0            | T1a | Yes | Alive | MALE   | WHITE                     | 71 | 129 |
| TCGA-69-8453-01A-12R-2326-07 | Tumor | LUAD | Not Available | Stage IIB     | MX            | N0            | T3  | Yes | Alive | MALE   | WHITE                     | 77 | 813 |

|                                      |       |      |                  |            |    |    |    |     |       |        |                                    |    |      |
|--------------------------------------|-------|------|------------------|------------|----|----|----|-----|-------|--------|------------------------------------|----|------|
| TCGA-69-<br>A59K-01A-11R-<br>A262-07 | Tumor | LUAD | Not<br>Evaluated | Stage IIB  | M0 | N0 | T3 | Yes | Alive | FEMALE | BLACK<br>OR<br>AFRICAN<br>AMERICAN | 60 | 591  |
| TCGA-71-<br>6725-01A-11R-<br>1858-07 | Tumor | LUAD | RX               | Stage IB   | M0 | N0 | T2 | Yes | Alive | FEMALE | ASIAN                              | 48 | 256  |
| TCGA-71-<br>8520-01A-11R-<br>2403-07 | Tumor | LUAD | R0               | Stage IB   | M0 | N0 | T2 | No  | Alive | FEMALE | ASIAN                              | 60 | 210  |
| TCGA-73-<br>4658-01A-01R-<br>1755-07 | Tumor | LUAD | R0               | Stage IB   | M0 | N0 | T2 | Yes | Dead  | FEMALE | WHITE                              | 80 | 1600 |
| TCGA-73-<br>4659-01A-01R-<br>1206-07 | Tumor | LUAD | R0               | Stage IIIA | M0 | N2 | T2 | Yes | Dead  | MALE   | WHITE                              | 66 | 711  |
| TCGA-73-<br>4662-01A-01R-<br>1206-07 | Tumor | LUAD | R0               | Stage IA   | M0 | N0 | T1 | Yes | Alive | FEMALE | WHITE                              | 65 | 2515 |

|                              |       |      |    |            |    |    |     |     |       |        |                                           |    |     |
|------------------------------|-------|------|----|------------|----|----|-----|-----|-------|--------|-------------------------------------------|----|-----|
| TCGA-73-4666-01A-01R-1206-07 | Tumor | LUAD | R0 | Stage IV   | M1 | N0 | T1  | Yes | Alive | FEMALE | WHITE                                     | 52 | 800 |
| TCGA-73-4668-01A-01R-1206-07 | Tumor | LUAD | R0 | Stage IIB  | M0 | N1 | T2  | Yes | Alive | FEMALE | AMERICAN<br>INDIAN OR<br>ALASKA<br>NATIVE | 66 | 467 |
| TCGA-73-4670-01A-01R-1206-07 | Tumor | LUAD | R0 | Stage IV   | M1 | N0 | T2  | Yes | Alive | FEMALE | WHITE                                     | 69 | 131 |
| TCGA-73-4675-01A-01R-1206-07 | Tumor | LUAD | RX | Stage IIIA | M0 | N1 | T3  | Yes | Alive | MALE   | WHITE                                     | 59 | 922 |
| TCGA-73-4676-01A-01R-1755-07 | Tumor | LUAD | R0 | Stage IIA  | M0 | N1 | T2a | Yes | Alive | MALE   | WHITE                                     | 45 | 281 |

|                              |        |      |    |             |    |    |     |     |       |        |                           |               |      |
|------------------------------|--------|------|----|-------------|----|----|-----|-----|-------|--------|---------------------------|---------------|------|
| TCGA-73-4676-11A-01R-1755-07 | Normal | LUAD | R0 | Stage IIA   | M0 | N1 | T2a | Yes | Alive | MALE   | WHITE                     | 45            | 281  |
| TCGA-73-4677-01A-01R-1206-07 | Tumor  | LUAD | R0 | Discrepancy | M0 | N0 | T2a | Yes | Dead  | MALE   | WHITE                     | 74            | 38   |
| TCGA-73-7498-01A-12R-2187-07 | Tumor  | LUAD | R0 | Stage IA    | M0 | N0 | T1b | Yes | Alive | FEMALE | WHITE                     | 58            | 1189 |
| TCGA-73-7499-01A-11R-2187-07 | Tumor  | LUAD | R0 | Stage IB    | M0 | N0 | T2a | No  | Alive | FEMALE | WHITE                     | 81            | 1531 |
| TCGA-73-A9RS-01A-11R-A41B-07 | Tumor  | LUAD | R0 | Stage IIB   | M0 | N0 | T3  | Yes | Alive | MALE   | BLACK OR AFRICAN AMERICAN | 41            | 340  |
| TCGA-75-5122-01A-01R-1755-07 | Tumor  | LUAD | R0 | Stage IB    | M0 | N0 | T2  | Yes | Dead  | MALE   | Not Available             | Not Available |      |

|                              |       |      |    |            |    |    |     |     |       |        |               |               |      |
|------------------------------|-------|------|----|------------|----|----|-----|-----|-------|--------|---------------|---------------|------|
| TCGA-75-5125-01A-01R-1755-07 | Tumor | LUAD | R0 | Stage IIB  | M0 | N1 | T2  | Yes | Alive | MALE   | Not Available | Not Available | 2027 |
| TCGA-75-5126-01A-01R-1755-07 | Tumor | LUAD | R2 | Stage IIIA | M0 | N2 | T3  | Yes | Alive | FEMALE | Not Available | Not Available |      |
| TCGA-75-5146-01A-01R-1628-07 | Tumor | LUAD | R0 | Stage IB   | M0 | N0 | T2  | Yes | Alive | MALE   | Not Available | Not Available | 2368 |
| TCGA-75-5147-01A-01R-1628-07 | Tumor | LUAD | R0 | Stage IB   | M0 | N0 | T2  | No  | Alive | FEMALE | Not Available | Not Available | 1333 |
| TCGA-75-6203-01A-11R-1755-07 | Tumor | LUAD | R0 | Stage IIIA | M0 | N2 | T2  | No  | Alive | FEMALE | Not Available | Not Available |      |
| TCGA-75-6205-01A-11R-1755-07 | Tumor | LUAD | R0 | Stage IB   | M0 | N0 | T2a | No  | Dead  | FEMALE | Not Available | Not Available |      |
| TCGA-75-6206-01A-11R-1755-07 | Tumor | LUAD | R0 | Stage IB   | M0 | N0 | T2  | Yes | Alive | MALE   | Not Available | Not Available | 2590 |



|                              |       |      |    |            |    |    |    |     |       |        |               |               |      |
|------------------------------|-------|------|----|------------|----|----|----|-----|-------|--------|---------------|---------------|------|
| TCGA-75-6207-01A-11R-1755-07 | Tumor | LUAD | R0 | Stage IIIA | M0 | N2 | T2 | Yes | Dead  | MALE   | Not Available | Not Available |      |
| TCGA-75-6211-01A-11R-1755-07 | Tumor | LUAD | R0 | Stage IB   | M0 | N0 | T2 | Yes | Dead  | FEMALE | Not Available | Not Available |      |
| TCGA-75-6212-01A-11R-1755-07 | Tumor | LUAD | R0 | Stage IIB  | M0 | N1 | T2 | No  | Alive | FEMALE | Not Available | Not Available | 1516 |
| TCGA-75-6214-01A-41R-1949-07 | Tumor | LUAD | R0 | Stage IIIA | M0 | N2 | T2 | Yes | Alive | FEMALE | Not Available | Not Available | 1115 |
| TCGA-75-7025-01A-12R-1949-07 | Tumor | LUAD | R0 | Stage IB   | M0 | N0 | T2 | Yes | Alive | MALE   | Not Available | Not Available | 3305 |
| TCGA-75-7027-01A-11R-1949-07 | Tumor | LUAD | R0 | Stage IB   | M0 | N0 | T2 | Yes | Alive | MALE   | Not Available | Not Available | 3059 |
| TCGA-75-7030-01A-11R-1949-07 | Tumor | LUAD | R0 | Stage IIB  | M0 | N0 | T3 | No  | Alive | MALE   | Not Available | Not Available |      |

|                              |       |      |    |            |    |    |    |     |       |        |               |               |      |  |
|------------------------------|-------|------|----|------------|----|----|----|-----|-------|--------|---------------|---------------|------|--|
| TCGA-75-7031-01A-11R-1949-07 | Tumor | LUAD | R0 | Stage IB   | M0 | N0 | T2 | Yes | Alive | FEMALE | Not Available | Not Available |      |  |
| TCGA-78-7143-01A-11R-2039-07 | Tumor | LUAD | R0 | Stage IB   | M0 | N0 | T2 | No  | Dead  | FEMALE | WHITE         | 62            | 4961 |  |
| TCGA-78-7145-01A-11R-2039-07 | Tumor | LUAD | R1 | Stage IV   | M1 | N1 | T4 | Yes | Dead  | FEMALE | WHITE         | 52            | 826  |  |
| TCGA-78-7146-01A-11R-2039-07 | Tumor | LUAD | R0 | Stage IIIA | M0 | N2 | T2 | Yes | Dead  | FEMALE | WHITE         | 71            | 173  |  |
| TCGA-78-7147-01A-11R-2039-07 | Tumor | LUAD | R0 | Stage IIB  | M0 | N1 | T2 | Yes | Dead  | FEMALE | WHITE         | 67            | 586  |  |
| TCGA-78-7148-01A-11R-2039-07 | Tumor | LUAD | R0 | Stage IIB  | M0 | N1 | T2 | Yes | Dead  | MALE   | WHITE         | 71            | 626  |  |
| TCGA-78-7149-01A-11R-2039-07 | Tumor | LUAD | R0 | Stage IIIB | M0 | N0 | T4 | Yes | Alive | MALE   | WHITE         | 71            | 3940 |  |

|                              |       |      |    |            |    |    |    |     |       |        |       |    |      |
|------------------------------|-------|------|----|------------|----|----|----|-----|-------|--------|-------|----|------|
| TCGA-78-7150-01A-21R-2039-07 | Tumor | LUAD | R0 | Stage IIB  | M0 | N1 | T2 | Yes | Dead  | MALE   | WHITE | 59 | 666  |
| TCGA-78-7152-01A-11R-2039-07 | Tumor | LUAD | R0 | Stage IB   | M0 | N0 | T2 | Yes | Alive | MALE   | WHITE | 65 | 1215 |
| TCGA-78-7153-01A-11R-2039-07 | Tumor | LUAD | R0 | Stage IB   | M0 | N0 | T2 | Yes | Alive | FEMALE | WHITE | 65 | 3635 |
| TCGA-78-7154-01A-11R-2039-07 | Tumor | LUAD | R0 | Stage IIIA | M0 | N2 | T3 | Yes | Dead  | MALE   | WHITE | 72 | 593  |
| TCGA-78-7155-01A-11R-2039-07 | Tumor | LUAD | R0 | Stage IB   | M0 | N0 | T2 | Yes | Dead  | MALE   | WHITE | 68 | 1171 |
| TCGA-78-7156-01A-11R-2039-07 | Tumor | LUAD | R0 | Stage IV   | M1 | N1 | T4 | Yes | Dead  | MALE   | WHITE | 62 | 976  |
| TCGA-78-7158-01A-11R-2039-07 | Tumor | LUAD | R1 | Stage IIIB | M0 | N2 | T4 | Yes | Dead  | FEMALE | WHITE | 59 | 179  |

|                              |       |      |    |           |    |    |    |     |       |        |       |    |      |
|------------------------------|-------|------|----|-----------|----|----|----|-----|-------|--------|-------|----|------|
| TCGA-78-7159-01A-11R-2039-07 | Tumor | LUAD | R0 | Stage IA  | M0 | NX | T1 | Yes | Alive | FEMALE | WHITE | 60 | 1974 |
| TCGA-78-7160-01A-11R-2039-07 | Tumor | LUAD | R0 | Stage IV  | M1 | N2 | T4 | Yes | Alive | MALE   | WHITE | 61 | 697  |
| TCGA-78-7161-01A-11R-2039-07 | Tumor | LUAD | R1 | Stage IIB | M0 | N0 | T3 | Yes | Alive | FEMALE | WHITE | 69 | 291  |
| TCGA-78-7162-01A-21R-2066-07 | Tumor | LUAD | R0 | Stage IA  | M0 | N0 | T1 | Yes | Dead  | MALE   | WHITE | 75 | 3169 |
| TCGA-78-7163-01A-12R-2066-07 | Tumor | LUAD | R0 | Stage IB  | M0 | N0 | T2 | Yes | Alive | MALE   | WHITE | 60 | 7248 |
| TCGA-78-7166-01A-12R-2066-07 | Tumor | LUAD | R0 | Stage IIB | M0 | N1 | T2 | Yes | Dead  | MALE   | WHITE | 84 | 258  |
| TCGA-78-7167-01A-11R-2066-07 | Tumor | LUAD | R0 | Stage IV  | M1 | N0 | T2 | Yes | Dead  | MALE   | WHITE | 77 | 2681 |

|                              |       |      |    |            |    |    |     |     |       |        |               |    |      |
|------------------------------|-------|------|----|------------|----|----|-----|-----|-------|--------|---------------|----|------|
| TCGA-78-7220-01A-11R-2039-07 | Tumor | LUAD | R0 | Stage IIIA | M0 | N2 | T2  | Yes | Dead  | FEMALE | WHITE         | 53 | 807  |
| TCGA-78-7535-01A-11R-2066-07 | Tumor | LUAD | R0 | Stage IB   | M0 | N0 | T2  | Yes | Dead  | MALE   | WHITE         | 45 | 949  |
| TCGA-78-7536-01A-11R-2066-07 | Tumor | LUAD | R0 | Stage IIIA | M0 | N2 | T2  | Yes | Dead  | MALE   | WHITE         | 69 | 244  |
| TCGA-78-7537-01A-11R-2066-07 | Tumor | LUAD | R0 | Stage IB   | M0 | N0 | T2  | Yes | Dead  | MALE   | Not Available | 72 | 1622 |
| TCGA-78-7539-01A-11R-2066-07 | Tumor | LUAD | R0 | Stage IIA  | M0 | N0 | T2b | Yes | Alive | FEMALE | WHITE         | 75 | 791  |
| TCGA-78-7540-01A-11R-2066-07 | Tumor | LUAD | R0 | Stage IB   | M0 | N0 | T2  | No  | Alive | FEMALE | WHITE         | 66 | 1197 |
| TCGA-78-7542-01A-21R-2066-07 | Tumor | LUAD | R0 | Stage IB   | M0 | N0 | T2  | Yes | Dead  | MALE   | WHITE         | 56 | 321  |

|                              |       |      |    |           |    |    |    |     |       |        |               |               |      |
|------------------------------|-------|------|----|-----------|----|----|----|-----|-------|--------|---------------|---------------|------|
| TCGA-78-7633-01A-11R-2066-07 | Tumor | LUAD | R0 | Stage IB  | M0 | N0 | T2 | Yes | Alive | MALE   | WHITE         | 67            | 1528 |
| TCGA-78-8640-01A-11R-2403-07 | Tumor | LUAD | R0 | Stage IIA | M0 | N1 | T1 | Yes | Alive | MALE   | Not Evaluated | 59            | 7062 |
| TCGA-78-8648-01A-11R-2403-07 | Tumor | LUAD | R0 | Stage IIB | M0 | N0 | T3 | Yes | Dead  | FEMALE | Not Evaluated | 58            | 1209 |
| TCGA-78-8655-01A-11R-2403-07 | Tumor | LUAD | R0 | Stage IA  | M0 | N0 | T1 | Yes | Alive | FEMALE | Not Evaluated | 77            | 2360 |
| TCGA-78-8660-01A-11R-2403-07 | Tumor | LUAD | R0 | Stage IIB | M0 | N1 | T2 | Yes | Dead  | MALE   | Not Evaluated | 69            | 321  |
| TCGA-78-8662-01A-11R-2403-07 | Tumor | LUAD | R0 | Stage IB  | M0 | N0 | T2 | Yes | Dead  | FEMALE | Not Evaluated | 53            | 3361 |
| TCGA-80-5607-01A-31R-1949-07 | Tumor | LUAD | R0 | Stage IIB | M0 | N1 | T2 | Yes | Alive | FEMALE | Not Available | Not Available |      |

|                              |       |      |               |           |    |    |     |     |       |        |               |               |      |
|------------------------------|-------|------|---------------|-----------|----|----|-----|-----|-------|--------|---------------|---------------|------|
| TCGA-80-5608-01A-31R-1949-07 | Tumor | LUAD | R0            | Stage IA  | M0 | N0 | T1  | Yes | Alive | FEMALE | Not Available | Not Available | 2832 |
| TCGA-80-5611-01A-01R-1628-07 | Tumor | LUAD | R0            | Stage IB  | M0 | N0 | T2  | Yes | Alive | MALE   | Not Available | Not Available | 2595 |
| TCGA-83-5908-01A-21R-2287-07 | Tumor | LUAD | R0            | Stage IA  | M0 | N0 | T1  | Yes | Alive | FEMALE | WHITE         | 59            | 824  |
| TCGA-86-6562-01A-11R-1755-07 | Tumor | LUAD | R0            | Stage IIA | M0 | N1 | T2a | No  | Alive | MALE   | WHITE         | 52            | 376  |
| TCGA-86-6851-01A-11R-1949-07 | Tumor | LUAD | Not Available | Stage IIA | M0 | N1 | T1b | Yes | Alive | FEMALE | WHITE         | 73            | 179  |
| TCGA-86-7701-01A-11R-2170-07 | Tumor | LUAD | R0            | Stage IV  | M1 | N0 | T2  | No  | Alive | MALE   | WHITE         | 66            | 947  |
| TCGA-86-7711-01A-11R-2066-07 | Tumor | LUAD | R0            | Stage IIA | M0 | N1 | T2a | Yes | Alive | MALE   | WHITE         | 70            | 1046 |

|                              |       |      |    |            |    |    |     |     |       |        |                           |    |      |
|------------------------------|-------|------|----|------------|----|----|-----|-----|-------|--------|---------------------------|----|------|
| TCGA-86-7713-01A-11R-2066-07 | Tumor | LUAD | R0 | Stage IIA  | M0 | N0 | T2b | No  | Alive | MALE   | WHITE                     | 70 | 1157 |
| TCGA-86-7714-01A-12R-2170-07 | Tumor | LUAD | R0 | Stage IIIA | M0 | N2 | T1b | Yes | Alive | FEMALE | BLACK OR AFRICAN AMERICAN | 61 | 625  |
| TCGA-86-7953-01A-11R-2187-07 | Tumor | LUAD | RX | Stage IA   | M0 | N0 | T1b | No  | Alive | FEMALE | WHITE                     | 69 | 997  |
| TCGA-86-7954-01A-11R-2187-07 | Tumor | LUAD | R0 | Stage IB   | M0 | N0 | T2  | Yes | Alive | FEMALE | WHITE                     | 68 | 605  |
| TCGA-86-7955-01A-11R-2187-07 | Tumor | LUAD | RX | Stage IB   | M0 | N0 | T2a | No  | Alive | MALE   | WHITE                     | 62 | 1072 |
| TCGA-86-8054-01A-11R-2241-07 | Tumor | LUAD | R0 | Stage IIB  | M0 | N1 | T2b | Yes | Alive | MALE   | WHITE                     | 61 | 1148 |



|                              |       |      |    |            |    |    |     |     |       |        |       |    |     |
|------------------------------|-------|------|----|------------|----|----|-----|-----|-------|--------|-------|----|-----|
| TCGA-86-8055-01A-11R-2241-07 | Tumor | LUAD | R0 | Stage IIA  | M0 | N1 | T2a | Yes | Alive | MALE   | WHITE | 79 | 124 |
| TCGA-86-8056-01A-11R-2241-07 | Tumor | LUAD | R0 | Stage IIIA | M0 | N0 | T4  | Yes | Alive | FEMALE | WHITE | 63 | 139 |
| TCGA-86-8073-01A-11R-2241-07 | Tumor | LUAD | R0 | Stage IB   | M0 | N0 | T2a | Yes | Alive | MALE   | WHITE | 58 | 740 |
| TCGA-86-8074-01A-11R-2241-07 | Tumor | LUAD | R0 | Stage IIA  | M0 | N1 | T1b | Yes | Alive | FEMALE | WHITE | 62 | 24  |
| TCGA-86-8075-01A-11R-2241-07 | Tumor | LUAD | R0 | Stage IB   | M0 | N0 | T2  | No  | Alive | FEMALE | WHITE | 66 | 694 |
| TCGA-86-8076-01A-31R-2241-07 | Tumor | LUAD | R0 | Stage IA   | M0 | N0 | T1  | No  | Alive | MALE   | WHITE | 42 | 993 |
| TCGA-86-8278-01A-11R-2287-07 | Tumor | LUAD | R0 | Stage IIB  | M0 | N1 | T2  | No  | Alive | FEMALE | WHITE | 63 | 944 |

|                              |       |      |               |            |    |    |     |     |       |        |       |    |     |
|------------------------------|-------|------|---------------|------------|----|----|-----|-----|-------|--------|-------|----|-----|
| TCGA-86-8279-01A-11R-2287-07 | Tumor | LUAD | R0            | Stage IIA  | M0 | N1 | T2a | No  | Alive | MALE   | WHITE | 46 | 949 |
| TCGA-86-8280-01A-11R-2287-07 | Tumor | LUAD | R0            | Stage IIA  | M0 | N0 | T2b | No  | Alive | FEMALE | WHITE | 54 | 701 |
| TCGA-86-8281-01A-11R-2287-07 | Tumor | LUAD | Not Evaluated | Stage IA   | M0 | NX | T1  | Yes | Alive | MALE   | WHITE | 75 | 0   |
| TCGA-86-8358-01A-11R-2326-07 | Tumor | LUAD | R0            | Stage IB   | M0 | N0 | T2a | Yes | Alive | MALE   | WHITE | 44 | 653 |
| TCGA-86-8359-01A-11R-2326-07 | Tumor | LUAD | R0            | Stage IIIA | M0 | N2 | T3  | Yes | Alive | MALE   | WHITE | 52 | 444 |
| TCGA-86-8585-01A-11R-2403-07 | Tumor | LUAD | R0            | Stage IB   | M0 | N0 | T2a | No  | Alive | MALE   | WHITE | 57 | 353 |
| TCGA-86-8668-01A-11R-2403-07 | Tumor | LUAD | R0            | Stage IA   | M0 | N0 | T1b | No  | Alive | FEMALE | WHITE | 61 | 423 |

|                              |       |      |    |           |    |    |     |     |       |        |       |    |     |
|------------------------------|-------|------|----|-----------|----|----|-----|-----|-------|--------|-------|----|-----|
| TCGA-86-8669-01A-11R-2403-07 | Tumor | LUAD | R0 | Stage IA  | M0 | N0 | T1b | Yes | Alive | MALE   | WHITE | 64 | 938 |
| TCGA-86-8671-01A-11R-2403-07 | Tumor | LUAD | R0 | Stage IIB | M0 | N1 | T2b | No  | Alive | FEMALE | WHITE | 72 | 839 |
| TCGA-86-8672-01A-21R-2403-07 | Tumor | LUAD | R0 | Stage IIB | M0 | N0 | T3  | No  | Alive | MALE   | WHITE | 59 | 19  |
| TCGA-86-8673-01A-11R-2403-07 | Tumor | LUAD | R0 | Stage IB  | M0 | N0 | T2  | Yes | Alive | MALE   | WHITE | 61 | 862 |
| TCGA-86-8674-01A-21R-2403-07 | Tumor | LUAD | R0 | Stage IIA | M0 | N1 | T2a | Yes | Alive | MALE   | WHITE | 50 | 806 |
| TCGA-86-A456-01A-11R-A24H-07 | Tumor | LUAD | R0 | Stage IA  | M0 | N0 | T1a | Yes | Alive | FEMALE | ASIAN | 78 | 896 |
| TCGA-86-A4D0-01A-11R-A24H-07 | Tumor | LUAD | R0 | Stage IIA | M0 | N0 | T2b | Yes | Alive | MALE   | WHITE | 48 | 116 |

|                                      |        |      |                  |            |    |    |     |     |       |        |       |    |      |
|--------------------------------------|--------|------|------------------|------------|----|----|-----|-----|-------|--------|-------|----|------|
| TCGA-86-<br>A4JF-01A-11R-<br>A24X-07 | Tumor  | LUAD | R0               | Stage IIB  | M0 | N0 | T3  | Yes | Alive | MALE   | WHITE | 56 | 737  |
| TCGA-86-<br>A4P7-01A-11R-<br>A24X-07 | Tumor  | LUAD | R0               | Stage IB   | M0 | N0 | T2a | No  | Alive | FEMALE | WHITE | 63 | 415  |
| TCGA-86-<br>A4P8-01A-11R-<br>A24X-07 | Tumor  | LUAD | Not<br>Evaluated | Stage IIIA | MX | N2 | T1b | No  | Alive | FEMALE | WHITE | 59 | 805  |
| TCGA-91-<br>6828-01A-11R-<br>1858-07 | Tumor  | LUAD | R0               | Stage IA   | M0 | N0 | T1a | Yes | Alive | MALE   | WHITE | 70 | 323  |
| TCGA-91-<br>6828-11A-01R-<br>1858-07 | Normal | LUAD | R0               | Stage IA   | M0 | N0 | T1a | Yes | Alive | MALE   | WHITE | 70 | 323  |
| TCGA-91-<br>6829-01A-21R-<br>1858-07 | Tumor  | LUAD | R0               | Stage IB   | MX | N0 | T2  | Yes | Dead  | MALE   | WHITE | 78 | 1258 |
| TCGA-91-<br>6829-11A-01R-<br>1858-07 | Normal | LUAD | R0               | Stage IB   | MX | N0 | T2  | Yes | Dead  | MALE   | WHITE | 78 | 1258 |

|                              |        |      |               |           |    |    |    |     |       |        |       |    |     |
|------------------------------|--------|------|---------------|-----------|----|----|----|-----|-------|--------|-------|----|-----|
| TCGA-91-6830-01A-11R-1949-07 | Tumor  | LUAD | Not Available | Stage IIA | MX | N1 | T1 | Yes | Alive | FEMALE | WHITE | 65 | 60  |
| TCGA-91-6831-01A-11R-1858-07 | Tumor  | LUAD | Not Available | Stage IB  | MX | N0 | T2 | Yes | Alive | MALE   | WHITE | 66 | 310 |
| TCGA-91-6831-11A-02R-1858-07 | Normal | LUAD | Not Available | Stage IB  | MX | N0 | T2 | Yes | Alive | MALE   | WHITE | 66 | 310 |
| TCGA-91-6835-01A-11R-1858-07 | Tumor  | LUAD | R0            | Stage IA  | M0 | N0 | T1 | Yes | Alive | FEMALE | WHITE | 81 | 79  |
| TCGA-91-6835-11A-01R-1858-07 | Normal | LUAD | R0            | Stage IA  | M0 | N0 | T1 | Yes | Alive | FEMALE | WHITE | 81 | 79  |
| TCGA-91-6836-01A-21R-1858-07 | Tumor  | LUAD | Not Available | Stage IB  | MX | N0 | T2 | Yes | Alive | FEMALE | WHITE | 52 | 417 |
| TCGA-91-6836-11A-01R-1858-07 | Normal | LUAD | Not Available | Stage IB  | MX | N0 | T2 | Yes | Alive | FEMALE | WHITE | 52 | 417 |

|                              |        |      |               |            |    |    |     |     |       |        |                           |    |     |
|------------------------------|--------|------|---------------|------------|----|----|-----|-----|-------|--------|---------------------------|----|-----|
| TCGA-91-6840-01A-11R-1949-07 | Tumor  | LUAD | R0            | Stage IA   | M0 | N0 | T1b | Yes | Alive | FEMALE | WHITE                     | 59 | 372 |
| TCGA-91-6847-01A-11R-1949-07 | Tumor  | LUAD | Not Available | Stage IB   | MX | N0 | T2  | Yes | Alive | FEMALE | WHITE                     | 62 | 842 |
| TCGA-91-6847-11A-01R-1949-07 | Normal | LUAD | Not Available | Stage IB   | MX | N0 | T2  | Yes | Alive | FEMALE | WHITE                     | 62 | 842 |
| TCGA-91-6848-01A-11R-1949-07 | Tumor  | LUAD | Not Available | Stage IIIA | MX | N2 | T2  | Yes | Alive | MALE   | WHITE                     | 59 | 224 |
| TCGA-91-6849-01A-11R-1949-07 | Tumor  | LUAD | Not Available | Stage IIIA | MX | N2 | T2  | Yes | Alive | FEMALE | BLACK OR AFRICAN AMERICAN | 75 | 35  |

|                              |        |      |               |            |    |    |     |     |       |        |                           |    |     |
|------------------------------|--------|------|---------------|------------|----|----|-----|-----|-------|--------|---------------------------|----|-----|
| TCGA-91-6849-11A-01R-1949-07 | Normal | LUAD | Not Available | Stage IIIA | MX | N2 | T2  | Yes | Alive | FEMALE | BLACK OR AFRICAN AMERICAN | 75 | 35  |
| TCGA-91-7771-01A-11R-2170-07 | Tumor  | LUAD | Not Available | Stage IIB  | MX | N0 | T3  | Yes | Alive | MALE   | WHITE                     | 62 | 492 |
| TCGA-91-8496-01A-11R-2403-07 | Tumor  | LUAD | Not Evaluated | Stage IB   | MX | NX | T2a | No  | Alive | FEMALE | WHITE                     | 63 | 505 |
| TCGA-91-8497-01A-11R-2403-07 | Tumor  | LUAD | Not Evaluated | Stage IA   | MX | N0 | T1a | No  | Alive | FEMALE | WHITE                     | 75 | 434 |
| TCGA-91-8499-01A-11R-2403-07 | Tumor  | LUAD | Not Evaluated | Stage IA   | MX | N0 | T1b | Yes | Alive | FEMALE | WHITE                     | 76 | 36  |
| TCGA-91-A4BC-01A-11R-A24H-07 | Tumor  | LUAD | Not Evaluated | Stage IIA  | MX | N0 | T2b | Yes | Alive | MALE   | WHITE                     | 59 | 44  |

|                                      |       |      |    |           |     |    |     |     |       |        |       |    |     |
|--------------------------------------|-------|------|----|-----------|-----|----|-----|-----|-------|--------|-------|----|-----|
| TCGA-91-<br>A4BD-01A-<br>11R-A24H-07 | Tumor | LUAD | RX | Stage IIA | MX  | N1 | T1b | Yes | Alive | MALE   | WHITE | 78 | 603 |
| TCGA-93-<br>7347-01A-11R-<br>2187-07 | Tumor | LUAD | R0 | Stage IA  | MX  | N0 | T1a | Yes | Alive | FEMALE | WHITE | 76 | 683 |
| TCGA-93-<br>7348-01A-21R-<br>2039-07 | Tumor | LUAD | R0 | Stage IA  | MX  | N0 | T1a | Yes | Alive | FEMALE | WHITE | 75 | 531 |
| TCGA-93-<br>8067-01A-11R-<br>2287-07 | Tumor | LUAD | RX | Stage IB  | MX  | N0 | T2a | Yes | Alive | MALE   | ASIAN | 77 | 186 |
| TCGA-93-<br>A4JN-01A-11R-<br>A24X-07 | Tumor | LUAD | RX | Stage IV  | M1a | N0 | T2a | Yes | Alive | MALE   | WHITE | 71 | 718 |
| TCGA-93-<br>A4JO-01A-<br>21R-A24X-07 | Tumor | LUAD | RX | Stage IA  | MX  | N0 | T1a | Yes | Dead  | MALE   | WHITE | 70 | 33  |
| TCGA-93-<br>A4JP-01A-11R-<br>A24X-07 | Tumor | LUAD | RX | Stage IV  | M1b | NX | TX  | No  | Alive | MALE   | ASIAN | 64 | 578 |



|                                      |       |      |                  |           |    |    |     |     |       |        |                                 |    |      |
|--------------------------------------|-------|------|------------------|-----------|----|----|-----|-----|-------|--------|---------------------------------|----|------|
| TCGA-93-<br>A4JQ-01A-<br>11R-A24X-07 | Tumor | LUAD | RX               | Stage IA  | MX | N0 | T1b | Yes | Alive | MALE   | WHITE                           | 49 | 526  |
| TCGA-95-<br>7039-01A-11R-<br>1949-07 | Tumor | LUAD | Not<br>Available | Stage IIB | MX | N0 | T3  | Yes | Alive | FEMALE | WHITE                           | 54 | 1272 |
| TCGA-95-<br>7043-01A-11R-<br>1949-07 | Tumor | LUAD | Not<br>Available | Stage IA  | MX | N0 | T1a | Yes | Alive | FEMALE | WHITE                           | 63 | 503  |
| TCGA-95-<br>7562-01A-11R-<br>2241-07 | Tumor | LUAD | RX               | Stage IIA | M0 | N1 | T2a | Yes | Dead  | MALE   | BLACK OR<br>AFRICAN<br>AMERICAN | 71 | 87   |
| TCGA-95-<br>7567-01A-11R-<br>2066-07 | Tumor | LUAD | Not<br>Available | Stage IIB | M0 | N1 | T2b | Yes | Alive | MALE   | WHITE                           | 61 | 568  |
| TCGA-95-<br>7944-01A-11R-<br>2187-07 | Tumor | LUAD | R0               | Stage IA  | M0 | N0 | T1a | Yes | Alive | MALE   | WHITE                           | 71 | 377  |

|                              |       |      |               |            |    |    |     |     |       |        |       |    |     |
|------------------------------|-------|------|---------------|------------|----|----|-----|-----|-------|--------|-------|----|-----|
| TCGA-95-7947-01A-11R-2187-07 | Tumor | LUAD | R0            | Stage IA   | M0 | N0 | T1a | Yes | Alive | MALE   | WHITE | 67 | 477 |
| TCGA-95-7948-01A-11R-2187-07 | Tumor | LUAD | R0            | Stage IB   | M0 | N0 | T2a | Yes | Alive | FEMALE | WHITE | 42 | 476 |
| TCGA-95-8039-01A-11R-2241-07 | Tumor | LUAD | RX            | Stage IA   | MX | N0 | T1  | No  | Alive | MALE   | WHITE | 72 | 830 |
| TCGA-95-8494-01A-11R-2326-07 | Tumor | LUAD | Not Evaluated | Stage IIA  | M0 | N1 | T2a | Yes | Alive | MALE   | WHITE | 67 | 84  |
| TCGA-95-A4VK-01A-11R-A262-07 | Tumor | LUAD | RX            | Stage IIIA | M0 | N2 | T2b | Yes | Alive | FEMALE | WHITE | 74 | 651 |
| TCGA-95-A4VN-01A-11R-A262-07 | Tumor | LUAD | R0            | Stage IIA  | M0 | N1 | T2a | Yes | Alive | FEMALE | WHITE | 62 | 553 |
| TCGA-95-A4VP-01A-21R-A262-07 | Tumor | LUAD | Not Evaluated | Stage IIIA | M0 | N2 | T2b | Yes | Alive | FEMALE | WHITE | 66 | 605 |

|                              |       |      |               |            |    |    |     |     |       |        |       |    |      |
|------------------------------|-------|------|---------------|------------|----|----|-----|-----|-------|--------|-------|----|------|
| TCGA-97-7546-01A-11R-2039-07 | Tumor | LUAD | R0            | Stage IA   | MX | N0 | T1  | Yes | Alive | FEMALE | WHITE | 76 | 1285 |
| TCGA-97-7547-01A-11R-2039-07 | Tumor | LUAD | Not Available | Stage IB   | MX | N0 | T2  | Yes | Alive | FEMALE | WHITE | 67 | 1965 |
| TCGA-97-7552-01A-11R-2039-07 | Tumor | LUAD | Not Available | Stage IB   | MX | N0 | T2  | Yes | Alive | MALE   | WHITE | 70 | 1932 |
| TCGA-97-7553-01A-21R-2039-07 | Tumor | LUAD | Not Available | Stage IA   | MX | N0 | T1  | Yes | Alive | FEMALE | WHITE | 58 | 1870 |
| TCGA-97-7554-01A-11R-2039-07 | Tumor | LUAD | R0            | Stage IIIA | M0 | N2 | T2a | Yes | Alive | FEMALE | WHITE | 83 | 775  |
| TCGA-97-7937-01A-11R-2170-07 | Tumor | LUAD | Not Available | Stage IB   | MX | N0 | T2a | Yes | Alive | MALE   | WHITE | 65 | 564  |
| TCGA-97-7938-01A-11R-2170-07 | Tumor | LUAD | R0            | Stage IA   | MX | N0 | T1a | Yes | Dead  | FEMALE | WHITE | 76 | 18   |

|                              |       |      |               |            |     |    |     |     |       |        |       |    |     |
|------------------------------|-------|------|---------------|------------|-----|----|-----|-----|-------|--------|-------|----|-----|
| TCGA-97-7941-01A-11R-2187-07 | Tumor | LUAD | R0            | Stage IA   | MX  | N0 | T1b | Yes | Alive | FEMALE | WHITE | 72 | 484 |
| TCGA-97-8171-01A-11R-2287-07 | Tumor | LUAD | Not Available | Stage IV   | M1a | N2 | T2a | Yes | Alive | MALE   | ASIAN | 81 | 568 |
| TCGA-97-8172-01A-11R-2287-07 | Tumor | LUAD | Not Available | Stage IB   | M0  | N0 | T2a | Yes | Alive | FEMALE | WHITE | 75 | 545 |
| TCGA-97-8174-01A-11R-2287-07 | Tumor | LUAD | Not Available | Stage IIA  | M0  | N0 | T2b | Yes | Dead  | MALE   | WHITE | 67 | 164 |
| TCGA-97-8175-01A-11R-2287-07 | Tumor | LUAD | Not Available | Stage IB   | M0  | N0 | T2a | Yes | Alive | FEMALE | WHITE | 55 | 551 |
| TCGA-97-8176-01A-11R-2403-07 | Tumor | LUAD | R0            | Stage IIIA | M0  | N1 | T3  | Yes | Alive | MALE   | WHITE | 63 | 468 |
| TCGA-97-8177-01A-11R-2287-07 | Tumor | LUAD | Not Available | Stage IB   | M0  | N0 | T2a | No  | Alive | FEMALE | WHITE | 59 | 499 |

|                              |       |      |               |            |    |    |     |     |       |        |               |    |     |
|------------------------------|-------|------|---------------|------------|----|----|-----|-----|-------|--------|---------------|----|-----|
| TCGA-97-8179-01A-11R-2287-07 | Tumor | LUAD | Not Available | Stage IA   | M0 | N0 | T1a | Yes | Alive | MALE   | WHITE         | 72 | 435 |
| TCGA-97-8547-01A-11R-2403-07 | Tumor | LUAD | Not Evaluated | Stage IIIA | MX | N2 | T2a | No  | Alive | FEMALE | Not Evaluated | 78 | 657 |
| TCGA-97-8552-01A-11R-2403-07 | Tumor | LUAD | Not Evaluated | Stage I    | MX | N0 | T1a | No  | Alive | FEMALE | WHITE         | 55 | 626 |
| TCGA-97-A4LX-01A-11R-A24X-07 | Tumor | LUAD | Not Evaluated | Stage IB   | M0 | N0 | T2a | Yes | Alive | MALE   | WHITE         | 81 | 614 |
| TCGA-97-A4M0-01A-11R-A24X-07 | Tumor | LUAD | Not Evaluated | Stage IB   | M0 | N0 | T2a | Yes | Alive | FEMALE | WHITE         | 60 | 652 |
| TCGA-97-A4M1-01A-11R-A24X-07 | Tumor | LUAD | Not Evaluated | Stage IA   | M0 | N0 | T1a | Yes | Alive | FEMALE | WHITE         | 52 | 601 |
| TCGA-97-A4M2-01A-12R-A24X-07 | Tumor | LUAD | R0            | Stage IA   | M0 | N0 | T1a | Yes | Alive | MALE   | WHITE         | 66 | 624 |

|                                      |       |      |                  |            |    |    |     |     |       |        |                                 |    |      |
|--------------------------------------|-------|------|------------------|------------|----|----|-----|-----|-------|--------|---------------------------------|----|------|
| TCGA-97-<br>A4M3-01A-<br>11R-A24X-07 | Tumor | LUAD | Not<br>Evaluated | Stage IA   | M0 | N0 | T1b | Yes | Alive | FEMALE | WHITE                           | 69 | 540  |
| TCGA-97-<br>A4M5-01A-<br>11R-A24X-07 | Tumor | LUAD | Not<br>Evaluated | Stage IA   | M0 | N0 | T1b | Yes | Alive | MALE   | WHITE                           | 83 | 634  |
| TCGA-97-<br>A4M6-01A-<br>11R-A24X-07 | Tumor | LUAD | Not<br>Evaluated | Stage IA   | M0 | N0 | T1a | No  | Alive | FEMALE | WHITE                           | 45 | 568  |
| TCGA-97-<br>A4M7-01A-<br>11R-A24X-07 | Tumor | LUAD | R0               | Stage IA   | M0 | N0 | T1b | Yes | Alive | MALE   | WHITE                           | 74 | 629  |
| TCGA-99-<br>7458-01A-11R-<br>2039-07 | Tumor | LUAD | R0               | Stage IIIA | M0 | N0 | T4  | Yes | Alive | FEMALE | WHITE                           | 74 | 747  |
| TCGA-99-<br>8025-01A-11R-<br>2241-07 | Tumor | LUAD | R0               | Stage IIIA | M0 | N2 | T3  | Yes | Alive | FEMALE | BLACK OR<br>AFRICAN<br>AMERICAN | 72 | 1060 |

|                              |       |      |               |           |    |    |     |     |       |        |                           |    |      |
|------------------------------|-------|------|---------------|-----------|----|----|-----|-----|-------|--------|---------------------------|----|------|
| TCGA-99-8028-01A-11R-2241-07 | Tumor | LUAD | R0            | Stage IA  | M0 | N0 | T1a | Yes | Alive | FEMALE | BLACK OR AFRICAN AMERICAN | 50 | 1118 |
| TCGA-99-8032-01A-11R-2241-07 | Tumor | LUAD | R0            | Stage IA  | M0 | N0 | T1a | Yes | Alive | MALE   | WHITE                     | 61 | 44   |
| TCGA-99-8033-01A-11R-2241-07 | Tumor | LUAD | R0            | Stage IV  | M1 | NX | TX  | No  | Alive | FEMALE | WHITE                     | 74 | 656  |
| TCGA-99-AA5R-01A-11R-A39D-07 | Tumor | LUAD | R0            | Stage IA  | M0 | N0 | T1a | Yes | Alive | FEMALE | BLACK OR AFRICAN AMERICAN | 70 | 658  |
| TCGA-J2-8192-01A-11R-2241-07 | Tumor | LUAD | Not Available | Stage IIA | MX | N1 | T2a | No  | Alive | FEMALE | WHITE                     | 65 | 739  |

|                              |       |      |               |           |    |    |     |     |       |        |       |    |      |
|------------------------------|-------|------|---------------|-----------|----|----|-----|-----|-------|--------|-------|----|------|
| TCGA-J2-8194-01A-11R-2241-07 | Tumor | LUAD | Not Available | Stage IIB | MX | N0 | T3  | Yes | Alive | FEMALE | WHITE | 69 | 724  |
| TCGA-J2-A4AD-01A-11R-A24H-07 | Tumor | LUAD | RX            | Stage IA  | MX | N0 | T1a | Yes | Alive | FEMALE | WHITE | 61 | 550  |
| TCGA-J2-A4AE-01A-21R-A24H-07 | Tumor | LUAD | R0            | Stage IA  | MX | N0 | T1a | No  | Alive | FEMALE | WHITE | 77 | 1079 |
| TCGA-J2-A4AG-01A-11R-A24H-07 | Tumor | LUAD | R0            | Stage IA  | MX | N0 | T1b | Yes | Alive | FEMALE | WHITE | 66 | 988  |
| TCGA-L4-A4E5-01A-11R-A24X-07 | Tumor | LUAD | R0            | Stage I   | M0 | N0 | T1  | Yes | Alive | FEMALE | WHITE | 48 | 578  |
| TCGA-L4-A4E6-01A-11R-A24H-07 | Tumor | LUAD | R0            | Stage IA  | M0 | N0 | T1  | Yes | Alive | MALE   | WHITE | 67 | 435  |
| TCGA-L9-A443-01A-12R-A24H-07 | Tumor | LUAD | R0            | Stage IA  | MX | N0 | T1a | Yes | Alive | FEMALE | WHITE | 63 | 193  |



|                                      |       |      |    |           |     |    |     |     |       |        |                                 |    |     |
|--------------------------------------|-------|------|----|-----------|-----|----|-----|-----|-------|--------|---------------------------------|----|-----|
| TCGA-L9-<br>A444-01A-21R-<br>A24H-07 | Tumor | LUAD | R0 | Stage IA  | MX  | N0 | T1a | Yes | Alive | FEMALE | WHITE                           | 60 | 307 |
| TCGA-L9-<br>A50W-01A-<br>12R-A39D-07 | Tumor | LUAD | R0 | Stage IIA | MX  | N1 | T1b | Yes | Alive | MALE   | BLACK OR<br>AFRICAN<br>AMERICAN | 75 | 442 |
| TCGA-L9-<br>A5IP-01A-21R-<br>A39D-07 | Tumor | LUAD | R1 | Stage IV  | M1b | N2 | T3  | Yes | Dead  | FEMALE | BLACK OR<br>AFRICAN<br>AMERICAN | 40 | 58  |
| TCGA-L9-<br>A743-01A-43R-<br>A39D-07 | Tumor | LUAD | R0 | Stage IIA | M0  | N1 | T2a | Yes | Alive | MALE   | BLACK OR<br>AFRICAN<br>AMERICAN | 56 | 664 |

|                                      |       |      |    |           |    |    |     |     |       |        |                              |    |    |      |
|--------------------------------------|-------|------|----|-----------|----|----|-----|-----|-------|--------|------------------------------|----|----|------|
| TCGA-L9-<br>A7SV-01A-<br>11R-A39D-07 | Tumor | LUAD | R0 | Stage IIA | M0 | N1 | T2a | Yes | Alive | MALE   | BLACK<br>AFRICAN<br>AMERICAN | OR | 69 | 565  |
| TCGA-L9-<br>A8F4-01A-11R-<br>A39D-07 | Tumor | LUAD | R0 | Stage IB  | MX | N0 | T2a | Yes | Alive | FEMALE | BLACK<br>AFRICAN<br>AMERICAN | OR | 64 | 476  |
| TCGA-MN-<br>A4N1-01A-<br>11R-A24X-07 | Tumor | LUAD | R0 | Stage IIA | M0 | N1 | T2a | Yes | Alive | MALE   | BLACK<br>AFRICAN<br>AMERICAN | OR | 60 | 827  |
| TCGA-MN-<br>A4N4-01A-<br>12R-A24X-07 | Tumor | LUAD | R0 | Stage IA  | M0 | N0 | T1b | Yes | Alive | MALE   | WHITE                        |    | 57 | 1175 |

|                              |       |      |    |            |    |    |     |     |       |        |         |    |      |
|------------------------------|-------|------|----|------------|----|----|-----|-----|-------|--------|---------|----|------|
| TCGA-MN-A4N5-01A-11R-A24X-07 | Tumor | LUAD | R0 | Stage IA   | M0 | N0 | T1a | Yes | Alive | MALE   | WHITE   | 63 | 84   |
| TCGA-MP-A4SV-01A-11R-A24X-07 | Tumor | LUAD | R0 | Stage IB   | M0 | N0 | T2  | Yes | Dead  | MALE   | Unknown | 67 | 2620 |
| TCGA-MP-A4SW-01A-21R-A24X-07 | Tumor | LUAD | R0 | Stage IIB  | M0 | N1 | T2  | Yes | Dead  | MALE   | WHITE   | 53 | 1778 |
| TCGA-MP-A4SY-01A-21R-A24X-07 | Tumor | LUAD | R0 | Stage IIB  | M0 | N1 | T2  | Yes | Dead  | MALE   | WHITE   | 61 | 1501 |
| TCGA-MP-A4T4-01A-11R-A262-07 | Tumor | LUAD | R0 | Stage IIB  | M0 | N1 | T2  | Yes | Dead  | FEMALE | WHITE   | 68 | 2617 |
| TCGA-MP-A4T6-01A-32R-A262-07 | Tumor | LUAD | R0 | Stage IIIA | MX | N2 | T1  | Yes | Dead  | FEMALE | WHITE   | 76 | 1790 |

|                              |       |      |    |            |    |    |    |     |      |        |         |    |      |
|------------------------------|-------|------|----|------------|----|----|----|-----|------|--------|---------|----|------|
| TCGA-MP-A4T7-01A-11R-A24X-07 | Tumor | LUAD | R0 | Stage IV   | M1 | N0 | T2 | Yes | Dead | FEMALE | Unknown | 75 | 167  |
| TCGA-MP-A4T8-01A-11R-A24X-07 | Tumor | LUAD | R0 | Stage IIIA | M0 | N2 | T2 | Yes | Dead | MALE   | Unknown | 68 | 161  |
| TCGA-MP-A4T9-01A-11R-A24X-07 | Tumor | LUAD | RX | Stage IIIA | MX | N2 | T2 | Yes | Dead | FEMALE | WHITE   | 54 | 1265 |
| TCGA-MP-A4TA-01A-21R-A24X-07 | Tumor | LUAD | R0 | Stage IA   | M0 | N0 | T1 | Yes | Dead | FEMALE | WHITE   | 75 | 950  |
| TCGA-MP-A4TC-01A-11R-A24X-07 | Tumor | LUAD | R0 | Stage IIIA | M0 | N2 | T1 | Yes | Dead | MALE   | WHITE   | 77 | 74   |
| TCGA-MP-A4TD-01A-32R-A262-07 | Tumor | LUAD | RX | Stage IIIA | M0 | N2 | T2 | Yes | Dead | MALE   | WHITE   | 71 | 307  |

|                              |       |      |    |           |    |    |     |     |       |        |         |    |      |
|------------------------------|-------|------|----|-----------|----|----|-----|-----|-------|--------|---------|----|------|
| TCGA-MP-A4TE-01A-22R-A466-07 | Tumor | LUAD | RX | Stage IIA | MX | N0 | T2b | Yes | Dead  | MALE   | WHITE   | 56 | 896  |
| TCGA-MP-A4TF-01A-11R-A262-07 | Tumor | LUAD | R0 | Stage IIA | M0 | N0 | T2b | Yes | Dead  | FEMALE | WHITE   | 58 | 336  |
| TCGA-MP-A4TH-01A-31R-A262-07 | Tumor | LUAD | R0 | Stage IA  | M0 | N0 | T1a | Yes | Alive | FEMALE | WHITE   | 70 | 741  |
| TCGA-MP-A4TI-01A-21R-A24X-07 | Tumor | LUAD | R0 | Stage IIA | M0 | N1 | T2a | Yes | Dead  | MALE   | WHITE   | 72 | 429  |
| TCGA-MP-A4TJ-01A-51R-A262-07 | Tumor | LUAD | R0 | Stage IA  | M0 | N0 | T1  | Yes | Dead  | FEMALE | Unknown | 62 | 339  |
| TCGA-MP-A4TK-01A-11R-A24X-07 | Tumor | LUAD | R0 | Stage IIB | MX | N1 | T2  | Yes | Dead  | FEMALE | Unknown | 56 | 582  |
| TCGA-MP-A5C7-01A-11R-A262-07 | Tumor | LUAD | R0 | Stage IB  | M0 | N0 | T2  | Yes | Alive | FEMALE | WHITE   | 76 | 2248 |

|                              |       |      |               |            |    |    |     |     |       |        |                           |    |      |
|------------------------------|-------|------|---------------|------------|----|----|-----|-----|-------|--------|---------------------------|----|------|
| TCGA-NJ-A4YF-01A-12R-A262-07 | Tumor | LUAD | Not Evaluated | Stage IA   | M0 | N0 | T1  | Yes | Alive | FEMALE | BLACK OR AFRICAN AMERICAN | 50 | 2161 |
| TCGA-NJ-A4YG-01A-22R-A262-07 | Tumor | LUAD | Not Evaluated | Stage IB   | M0 | N0 | T2  | Yes | Alive | MALE   | WHITE                     | 65 | 2261 |
| TCGA-NJ-A4YI-01A-11R-A262-07 | Tumor | LUAD | Not Evaluated | Stage IIIA | M0 | N2 | T2  | Yes | Dead  | FEMALE | WHITE                     | 87 | 4    |
| TCGA-NJ-A4YP-01A-11R-A262-07 | Tumor | LUAD | Not Evaluated | Stage IB   | M0 | N0 | T2a | Yes | Alive | MALE   | WHITE                     | 52 | 50   |
| TCGA-NJ-A4YQ-01A-11R-A262-07 | Tumor | LUAD | RX            | Stage IA   | M0 | N0 | T1b | Yes | Alive | FEMALE | WHITE                     | 69 | 1432 |
| TCGA-NJ-A55A-01A-11R-A262-07 | Tumor | LUAD | Not Available | Stage IB   | M0 | N0 | T2  | Yes | Alive | FEMALE | WHITE                     | 76 | 15   |

|                              |       |      |               |            |    |    |     |     |       |        |                           |    |      |
|------------------------------|-------|------|---------------|------------|----|----|-----|-----|-------|--------|---------------------------|----|------|
| TCGA-NJ-A55O-01A-11R-A262-07 | Tumor | LUAD | Not Available | Stage IIA  | M0 | N1 | T1b | Yes | Alive | FEMALE | WHITE                     | 56 | 13   |
| TCGA-NJ-A55R-01A-11R-A262-07 | Tumor | LUAD | Not Available | Stage IA   | MX | N0 | T1b | Yes | Alive | MALE   | WHITE                     | 67 | 603  |
| TCGA-NJ-A7XG-01A-12R-A39D-07 | Tumor | LUAD | Not Available | Stage IIIA | M0 | N1 | T4  | Yes | Alive | MALE   | BLACK OR AFRICAN AMERICAN | 49 | 617  |
| TCGA-O1-A52J-01A-11R-A262-07 | Tumor | LUAD | Not Evaluated | Stage IA   | MX | N0 | T1  | Yes | Dead  | FEMALE | WHITE                     | 74 | 1798 |
| TCGA-S2-AA1A-01A-12R-A39D-07 | Tumor | LUAD | R0            | Stage IA   | M0 | N0 | T1b | Yes | Alive | FEMALE | BLACK OR AFRICAN AMERICAN | 68 | 513  |

|                              |       |      |    |            |    |    |    |     |       |        |               |    |      |
|------------------------------|-------|------|----|------------|----|----|----|-----|-------|--------|---------------|----|------|
| TCGA-18-3406-01A-01R-0980-07 | Tumor | LUSC | R0 | Stage IA   | M0 | N0 | T1 | Yes | Dead  | MALE   | WHITE         | 67 | 371  |
| TCGA-18-3407-01A-01R-0980-07 | Tumor | LUSC | R0 | Stage IB   | M0 | N0 | T2 | Yes | Dead  | MALE   | ASIAN         | 72 | 136  |
| TCGA-18-3408-01A-01R-0980-07 | Tumor | LUSC | R0 | Stage IB   | M0 | N0 | T2 | Yes | Alive | FEMALE | WHITE         | 77 | 2304 |
| TCGA-18-3409-01A-01R-0980-07 | Tumor | LUSC | R0 | Stage IA   | M0 | N0 | T1 | Yes | Alive | MALE   | WHITE         | 74 | 3747 |
| TCGA-18-3410-01A-01R-0980-07 | Tumor | LUSC | R0 | Stage IIB  | M0 | N0 | T3 | Yes | Dead  | MALE   | Not Available | 81 | 146  |
| TCGA-18-3411-01A-01R-0980-07 | Tumor | LUSC | R0 | Stage IIIA | M0 | N2 | T2 | Yes | Alive | FEMALE | Not Available | 63 | 3576 |
| TCGA-18-3412-01A-01R-0980-07 | Tumor | LUSC | R0 | Stage IB   | M0 | N0 | T2 | Yes | Dead  | MALE   | WHITE         | 52 | 345  |



|                              |       |      |    |           |    |    |    |     |       |      |               |    |      |
|------------------------------|-------|------|----|-----------|----|----|----|-----|-------|------|---------------|----|------|
| TCGA-18-3414-01A-01R-0980-07 | Tumor | LUSC | R0 | Stage IV  | M1 | N1 | T4 | Yes | Dead  | MALE | ASIAN         | 73 | 716  |
| TCGA-18-3415-01A-01R-0980-07 | Tumor | LUSC | R0 | Stage IB  | M0 | N0 | T2 | Yes | Alive | MALE | Not Available | 77 | 2803 |
| TCGA-18-3416-01A-01R-0980-07 | Tumor | LUSC | R0 | Stage IIB | M0 | N1 | T2 | Yes | Alive | MALE | Not Available | 83 | 973  |
| TCGA-18-3417-01A-01R-1443-07 | Tumor | LUSC | R0 | Stage IV  | M1 | N1 | T2 | Yes | Alive | MALE | Not Available | 65 | 1097 |
| TCGA-18-3419-01A-01R-0980-07 | Tumor | LUSC | R0 | Stage IIB | M0 | N1 | T2 | Yes | Alive | MALE | Not Available | 73 | 2811 |
| TCGA-18-3421-01A-01R-0980-07 | Tumor | LUSC | R0 | Stage IB  | M0 | N0 | T2 | Yes | Alive | MALE | WHITE         | 65 | 2645 |
| TCGA-18-4083-01A-01R-1100-07 | Tumor | LUSC | R0 | Stage IIB | M0 | N1 | T2 | Yes | Dead  | MALE | WHITE         | 63 | 188  |

|                              |       |      |    |            |    |    |    |     |       |        |                           |    |      |
|------------------------------|-------|------|----|------------|----|----|----|-----|-------|--------|---------------------------|----|------|
| TCGA-18-4086-01A-01R-1100-07 | Tumor | LUSC | R0 | Stage IB   | M0 | N0 | T2 | Yes | Dead  | MALE   | Not Available             | 64 | 85   |
| TCGA-18-4721-01A-01R-1443-07 | Tumor | LUSC | R0 | Stage IA   | M0 | N0 | T1 | Yes | Alive | MALE   | WHITE                     | 74 | 4694 |
| TCGA-18-5592-01A-01R-1635-07 | Tumor | LUSC | R0 | Stage IIB  | M0 | N0 | T3 | Yes | Alive | MALE   | Not Available             | 57 | 1519 |
| TCGA-18-5595-01A-01R-1635-07 | Tumor | LUSC | R0 | Stage IB   | M0 | N0 | T2 | No  | Dead  | MALE   | Not Available             | 50 | 827  |
| TCGA-21-1070-01A-01R-0692-07 | Tumor | LUSC | R0 | Stage IIIA | M0 | N0 | T3 | Yes | Alive | FEMALE | BLACK OR AFRICAN AMERICAN | 60 | 3636 |
| TCGA-21-1071-01A-01R-0692-07 | Tumor | LUSC | R0 | Stage IB   | M0 | N0 | T2 | Yes | Dead  | MALE   | WHITE                     | 67 | 1426 |

|                              |       |      |    |            |    |    |    |     |       |        |       |    |      |
|------------------------------|-------|------|----|------------|----|----|----|-----|-------|--------|-------|----|------|
| TCGA-21-1072-01A-01R-0692-07 | Tumor | LUSC | R0 | Stage IB   | M0 | N0 | T2 | Yes | Alive | MALE   | WHITE | 75 | 3016 |
| TCGA-21-1075-01A-01R-0692-07 | Tumor | LUSC | R0 | Stage IIB  | M0 | N1 | T2 | Yes | Alive | MALE   | WHITE | 57 | 2134 |
| TCGA-21-1076-01A-01R-0692-07 | Tumor | LUSC | R0 | Stage IB   | M0 | N0 | T2 | Yes | Alive | FEMALE | WHITE | 54 | 1852 |
| TCGA-21-1076-01A-02R-0692-07 | Tumor | LUSC | R0 | Stage IB   | M0 | N0 | T2 | Yes | Alive | FEMALE | WHITE | 54 | 1852 |
| TCGA-21-1077-01A-01R-0692-07 | Tumor | LUSC | R0 | Stage IIB  | M0 | N1 | T2 | Yes | Dead  | MALE   | WHITE | 64 | 1058 |
| TCGA-21-1078-01A-01R-0692-07 | Tumor | LUSC | R0 | Stage IB   | M0 | N0 | T2 | Yes | Dead  | MALE   | WHITE | 77 | 474  |
| TCGA-21-1079-01A-01R-0692-07 | Tumor | LUSC | R0 | Stage IIIA | M0 | N0 | T3 | Yes | Dead  | MALE   | WHITE | 71 | 965  |

|                              |       |      |    |           |    |    |    |               |       |        |       |    |      |
|------------------------------|-------|------|----|-----------|----|----|----|---------------|-------|--------|-------|----|------|
| TCGA-21-1080-01A-01R-0692-07 | Tumor | LUSC | R0 | Stage IB  | M0 | N0 | T2 | Yes           | Alive | MALE   | WHITE | 66 | 3724 |
| TCGA-21-1081-01A-01R-0692-07 | Tumor | LUSC | R0 | Stage IIB | M0 | N1 | T2 | Yes           | Dead  | MALE   | WHITE | 69 | 284  |
| TCGA-21-1082-01A-01R-0692-07 | Tumor | LUSC | R0 | Stage IB  | M0 | N0 | T2 | Not Available | Alive | MALE   | WHITE | 61 | 3644 |
| TCGA-21-1083-01A-01R-0692-07 | Tumor | LUSC | R0 | Stage IA  | M0 | N0 | T1 | Yes           | Dead  | MALE   | WHITE | 75 | 1315 |
| TCGA-21-5782-01A-01R-1635-07 | Tumor | LUSC | R0 | Stage IB  | M0 | N0 | T2 | Yes           | Dead  | FEMALE | WHITE | 68 | 962  |
| TCGA-21-5783-01A-41R-2187-07 | Tumor | LUSC | R0 | Stage IB  | M0 | N0 | T2 | Yes           | Dead  | MALE   | WHITE | 76 | 2680 |
| TCGA-21-5784-01A-01R-1635-07 | Tumor | LUSC | R0 | Stage IB  | M0 | N0 | T2 | Yes           | Alive | FEMALE | WHITE | 80 | 1268 |

|                              |       |      |    |            |    |    |     |     |       |      |                           |    |      |
|------------------------------|-------|------|----|------------|----|----|-----|-----|-------|------|---------------------------|----|------|
| TCGA-21-5786-01A-01R-1635-07 | Tumor | LUSC | R0 | Stage IB   | M0 | N0 | T2  | Yes | Alive | MALE | WHITE                     | 64 | 1032 |
| TCGA-21-5787-01A-01R-1635-07 | Tumor | LUSC | R0 | Stage IIIA | M0 | N2 | T2  | Yes | Dead  | MALE | BLACK OR AFRICAN AMERICAN | 65 | 329  |
| TCGA-21-A5DI-01A-31R-A26W-07 | Tumor | LUSC | R0 | Stage IA   | M0 | N0 | T1b | Yes | Alive | MALE | WHITE                     | 77 | 979  |
| TCGA-22-0940-01A-01R-0692-07 | Tumor | LUSC | R0 | Stage IIA  | M0 | N1 | T1  | Yes | Dead  | MALE | WHITE                     | 71 | 669  |
| TCGA-22-0944-01A-01R-0692-07 | Tumor | LUSC | R0 | Stage IB   | M0 | N0 | T2  | Yes | Dead  | MALE | WHITE                     | 61 | 223  |
| TCGA-22-1000-01A-01R-A32Z-07 | Tumor | LUSC | R0 | Stage IB   | M0 | N0 | T2  | Yes | Dead  | MALE | WHITE                     | 76 | 454  |

|                              |       |      |    |            |    |    |    |     |      |        |       |    |      |
|------------------------------|-------|------|----|------------|----|----|----|-----|------|--------|-------|----|------|
| TCGA-22-1002-01A-01R-0692-07 | Tumor | LUSC | R0 | Stage IA   | M0 | N0 | T1 | Yes | Dead | MALE   | WHITE | 69 | 131  |
| TCGA-22-1005-01A-01R-0692-07 | Tumor | LUSC | R0 | Stage IA   | M0 | N0 | T1 | Yes | Dead | MALE   | WHITE | 63 | 1953 |
| TCGA-22-1011-01A-01R-0692-07 | Tumor | LUSC | R0 | Stage IB   | M0 | N0 | T2 | Yes | Dead | MALE   | WHITE | 73 | 53   |
| TCGA-22-1012-01A-01R-0692-07 | Tumor | LUSC | R0 | Stage IB   | M0 | N0 | T2 | Yes | Dead | FEMALE | WHITE | 80 | 429  |
| TCGA-22-1016-01A-01R-0692-07 | Tumor | LUSC | R0 | Stage IB   | M0 | N0 | T2 | Yes | Dead | MALE   | WHITE | 65 | 822  |
| TCGA-22-1017-01A-01R-0692-07 | Tumor | LUSC | R0 | Stage IA   | M0 | N0 | T1 | Yes | Dead | MALE   | WHITE | 62 | 1485 |
| TCGA-22-4591-01A-01R-1201-07 | Tumor | LUSC | R0 | Stage IIIA | M0 | N2 | T3 | Yes | Dead | MALE   | WHITE | 80 | 623  |

|                              |        |      |    |            |               |    |     |     |      |        |               |    |      |
|------------------------------|--------|------|----|------------|---------------|----|-----|-----|------|--------|---------------|----|------|
| TCGA-22-4593-01A-21R-1820-07 | Tumor  | LUSC | R0 | Stage IIA  | M0            | N0 | T2b | Yes | Dead | MALE   | WHITE         | 77 | 1067 |
| TCGA-22-4593-11A-01R-1820-07 | Normal | LUSC | R0 | Stage IIA  | M0            | N0 | T2b | Yes | Dead | MALE   | WHITE         | 77 | 1067 |
| TCGA-22-4594-01A-01R-1201-07 | Tumor  | LUSC | R0 | Stage IIIA | M0            | N2 | T3  | Yes | Dead | FEMALE | Not Available | 60 | 1470 |
| TCGA-22-4595-01A-01R-1201-07 | Tumor  | LUSC | R0 | Stage IIIA | Not Available | N2 | T3  | Yes | Dead | MALE   | WHITE         | 57 | 734  |
| TCGA-22-4596-01A-01R-1201-07 | Tumor  | LUSC | R0 | Stage IB   | M0            | N0 | T1b | Yes | Dead | FEMALE | WHITE         | 69 | 17   |
| TCGA-22-4599-01A-01R-1443-07 | Tumor  | LUSC | R0 | Stage IB   | M0            | N0 | T2a | Yes | Dead | FEMALE | WHITE         | 73 | 1161 |
| TCGA-22-4601-01A-01R-1443-07 | Tumor  | LUSC | R0 | Stage IIIA | M0            | N0 | T4  | Yes | Dead | FEMALE | WHITE         | 73 | 1057 |

|                              |        |      |    |           |    |    |     |     |       |        |               |    |      |
|------------------------------|--------|------|----|-----------|----|----|-----|-----|-------|--------|---------------|----|------|
| TCGA-22-4604-01A-01R-1201-07 | Tumor  | LUSC | R0 | Stage IIA | M0 | N1 | T2a | Yes | Dead  | MALE   | WHITE         | 73 | 399  |
| TCGA-22-4605-01A-21R-2125-07 | Tumor  | LUSC | R0 | Stage IB  | M0 | N0 | T2  | Yes | Dead  | FEMALE | Not Available | 78 | 974  |
| TCGA-22-4607-01A-01R-1201-07 | Tumor  | LUSC | R0 | Stage IB  | M0 | N0 | T2a | Yes | Dead  | MALE   | WHITE         | 75 | 587  |
| TCGA-22-4609-01A-21R-2125-07 | Tumor  | LUSC | R0 | Stage IA  | M0 | N0 | T1  | Yes | Dead  | MALE   | WHITE         | 81 | 291  |
| TCGA-22-4609-11A-01R-2125-07 | Normal | LUSC | R0 | Stage IA  | M0 | N0 | T1  | Yes | Dead  | MALE   | WHITE         | 81 | 291  |
| TCGA-22-4613-01A-01R-1443-07 | Tumor  | LUSC | R0 | Stage IA  | M0 | N0 | T1b | Yes | Dead  | FEMALE | WHITE         | 73 | 358  |
| TCGA-22-5471-01A-01R-1635-07 | Tumor  | LUSC | R2 | Stage IB  | M0 | N0 | T2  | Yes | Alive | MALE   | WHITE         | 75 | 1845 |



|                              |        |      |    |             |    |    |     |     |       |      |               |    |      |
|------------------------------|--------|------|----|-------------|----|----|-----|-----|-------|------|---------------|----|------|
| TCGA-22-5471-11A-01R-1635-07 | Normal | LUSC | R2 | Stage IB    | M0 | N0 | T2  | Yes | Alive | MALE | WHITE         | 75 | 1845 |
| TCGA-22-5472-01A-01R-1635-07 | Tumor  | LUSC | R0 | Stage IB    | M0 | N0 | T2a | Yes | Dead  | MALE | WHITE         | 67 | 1975 |
| TCGA-22-5472-11A-11R-1635-07 | Normal | LUSC | R0 | Stage IB    | M0 | N0 | T2a | Yes | Dead  | MALE | WHITE         | 67 | 1975 |
| TCGA-22-5473-01A-01R-1635-07 | Tumor  | LUSC | R0 | Discrepancy | M0 | N0 | T3  | Yes | Dead  | MALE | WHITE         | 78 | 1933 |
| TCGA-22-5474-01A-01R-1635-07 | Tumor  | LUSC | R0 | Stage IB    | M0 | N0 | T2a | Yes | Dead  | MALE | WHITE         | 74 | 445  |
| TCGA-22-5477-01A-01R-1635-07 | Tumor  | LUSC | R0 | Stage IA    | M0 | N0 | T1  | Yes | Dead  | MALE | WHITE         | 65 | 1346 |
| TCGA-22-5478-01A-01R-1635-07 | Tumor  | LUSC | R0 | Stage IB    | M0 | N0 | T2a | Yes | Dead  | MALE | Not Available | 79 | 24   |

|                              |        |      |    |           |    |    |     |     |       |        |               |    |      |
|------------------------------|--------|------|----|-----------|----|----|-----|-----|-------|--------|---------------|----|------|
| TCGA-22-5478-11A-11R-1635-07 | Normal | LUSC | R0 | Stage IB  | M0 | N0 | T2a | Yes | Dead  | MALE   | Not Available | 79 | 24   |
| TCGA-22-5479-01A-31R-1949-07 | Tumor  | LUSC | R0 | Stage IB  | M0 | N0 | T2  | Yes | Alive | MALE   | WHITE         | 64 | 2625 |
| TCGA-22-5480-01A-01R-1635-07 | Tumor  | LUSC | R0 | Stage IA  | M0 | N0 | T1b | Yes | Dead  | FEMALE | WHITE         | 66 | 2170 |
| TCGA-22-5481-01A-31R-1949-07 | Tumor  | LUSC | R0 | Stage IIB | M0 | N1 | T2  | Yes | Dead  | FEMALE | WHITE         | 72 | 2409 |
| TCGA-22-5481-11A-01R-1949-07 | Normal | LUSC | R0 | Stage IIB | M0 | N1 | T2  | Yes | Dead  | FEMALE | WHITE         | 72 | 2409 |
| TCGA-22-5482-01A-01R-1635-07 | Tumor  | LUSC | R0 | Stage IB  | M0 | N0 | T2a | Yes | Dead  | MALE   | WHITE         | 81 | 357  |
| TCGA-22-5482-11A-01R-1635-07 | Normal | LUSC | R0 | Stage IB  | M0 | N0 | T2a | Yes | Dead  | MALE   | WHITE         | 81 | 357  |

|                              |        |      |    |           |    |    |     |     |      |        |       |    |      |
|------------------------------|--------|------|----|-----------|----|----|-----|-----|------|--------|-------|----|------|
| TCGA-22-5483-01A-01R-1820-07 | Tumor  | LUSC | R0 | Stage IIA | M0 | N1 | T1a | Yes | Dead | MALE   | WHITE | 74 | 573  |
| TCGA-22-5483-11A-11R-1820-07 | Normal | LUSC | R0 | Stage IIA | M0 | N1 | T1a | Yes | Dead | MALE   | WHITE | 74 | 573  |
| TCGA-22-5485-01A-01R-1635-07 | Tumor  | LUSC | R0 | Stage IA  | M0 | N0 | T1a | Yes | Dead | FEMALE | WHITE | 58 | 916  |
| TCGA-22-5489-01A-01R-1635-07 | Tumor  | LUSC | R0 | Stage IA  | M0 | N0 | T1b | Yes | Dead | MALE   | WHITE | 64 | 1912 |
| TCGA-22-5489-11A-01R-1635-07 | Normal | LUSC | R0 | Stage IA  | M0 | N0 | T1b | Yes | Dead | MALE   | WHITE | 64 | 1912 |
| TCGA-22-5491-01A-01R-1635-07 | Tumor  | LUSC | R0 | Stage IA  | M0 | N0 | T1a | Yes | Dead | MALE   | WHITE | 74 | 1713 |
| TCGA-22-5491-11A-01R-1858-07 | Normal | LUSC | R0 | Stage IA  | M0 | N0 | T1a | Yes | Dead | MALE   | WHITE | 74 | 1713 |

|                              |       |      |    |            |    |    |     |     |       |        |                           |    |      |
|------------------------------|-------|------|----|------------|----|----|-----|-----|-------|--------|---------------------------|----|------|
| TCGA-22-5492-01A-01R-1635-07 | Tumor | LUSC | R0 | Stage IIIA | M0 | N2 | T2a | Yes | Dead  | FEMALE | Not Available             | 73 | 506  |
| TCGA-22-A5C4-01A-12R-A27Q-07 | Tumor | LUSC | R0 | Stage IIA  | M0 | N0 | T2b | Yes | Alive | MALE   | WHITE                     | 70 | 671  |
| TCGA-33-4532-01A-01R-1201-07 | Tumor | LUSC | R0 | Stage IB   | M0 | N0 | T2  | Yes | Alive | MALE   | WHITE                     | 68 | 3924 |
| TCGA-33-4533-01A-01R-1201-07 | Tumor | LUSC | R0 | Stage IB   | M0 | N0 | T2  | Yes | Alive | FEMALE | BLACK OR AFRICAN AMERICAN | 76 | 4068 |
| TCGA-33-4538-01A-01R-1201-07 | Tumor | LUSC | RX | Stage IIIA | M0 | N2 | T2  | Yes | Dead  | MALE   | WHITE                     | 66 | 2979 |
| TCGA-33-4547-01A-01R-1201-07 | Tumor | LUSC | R0 | Stage IB   | M0 | N0 | T2  | Yes | Alive | MALE   | WHITE                     | 68 | 2419 |

|                              |        |      |               |            |    |    |    |     |       |        |       |    |      |
|------------------------------|--------|------|---------------|------------|----|----|----|-----|-------|--------|-------|----|------|
| TCGA-33-4566-01A-01R-1443-07 | Tumor  | LUSC | R0            | Stage IB   | M0 | N0 | T2 | Yes | Dead  | MALE   | WHITE | 40 | 5287 |
| TCGA-33-4582-01A-01R-1443-07 | Tumor  | LUSC | R0            | Stage IA   | M0 | N0 | T1 | Yes | Dead  | MALE   | WHITE | 55 | 3149 |
| TCGA-33-4583-01A-01R-1443-07 | Tumor  | LUSC | R0            | Stage IA   | M0 | N0 | T1 | Yes | Alive | MALE   | WHITE | 73 | 4601 |
| TCGA-33-4586-01A-01R-1443-07 | Tumor  | LUSC | Not Available | Stage IIIA | M0 | N2 | T2 | Yes | Dead  | MALE   | WHITE | 57 | 428  |
| TCGA-33-4587-01A-11R-2125-07 | Tumor  | LUSC | R0            | Stage IB   | MX | N0 | T2 | Yes | Dead  | FEMALE | WHITE | 63 | 1656 |
| TCGA-33-4587-11A-01R-2125-07 | Normal | LUSC | R0            | Stage IB   | MX | N0 | T2 | Yes | Dead  | FEMALE | WHITE | 63 | 1656 |
| TCGA-33-4589-01A-01R-1443-07 | Tumor  | LUSC | Not Available | Stage IIB  | M0 | N1 | T2 | Yes | Dead  | FEMALE | WHITE | 62 | 47   |

|                              |        |      |               |            |    |    |     |     |       |        |                           |    |      |
|------------------------------|--------|------|---------------|------------|----|----|-----|-----|-------|--------|---------------------------|----|------|
| TCGA-33-6737-01A-11R-1820-07 | Tumor  | LUSC | Not Available | Stage IIIA | M0 | N2 | T2  | Yes | Dead  | MALE   | WHITE                     | 71 | 601  |
| TCGA-33-6737-11A-01R-1820-07 | Normal | LUSC | Not Available | Stage IIIA | M0 | N2 | T2  | Yes | Dead  | MALE   | WHITE                     | 71 | 601  |
| TCGA-33-6738-01A-11R-1949-07 | Tumor  | LUSC | Not Available | Stage IIIA | MX | N2 | T1  | Yes | Alive | MALE   | WHITE                     | 80 | 1927 |
| TCGA-33-A4WN-01A-11R-A262-07 | Tumor  | LUSC | R0            | Stage IB   | MX | N0 | T2a | Yes | Dead  | MALE   | WHITE                     | 60 | 143  |
| TCGA-33-A5GW-01A-11R-A27Q-07 | Tumor  | LUSC | R0            | Stage IIA  | MX | N1 | T1a | Yes | Alive | MALE   | WHITE                     | 67 | 9    |
| TCGA-33-AAS8-01A-11R-A405-07 | Tumor  | LUSC | R0            | Stage IA   | MX | N0 | T1  | Yes | Dead  | FEMALE | BLACK OR AFRICAN AMERICAN | 59 | 1114 |

|                                      |       |      |    |           |    |    |    |     |      |        |                              |    |    |      |
|--------------------------------------|-------|------|----|-----------|----|----|----|-----|------|--------|------------------------------|----|----|------|
| TCGA-33-<br>AASB-01A-<br>11R-A405-07 | Tumor | LUSC | R0 | Stage IB  | MX | N0 | T2 | Yes | Dead | MALE   | BLACK<br>AFRICAN<br>AMERICAN | OR | 66 | 211  |
| TCGA-33-<br>AASD-01A-<br>11R-A405-07 | Tumor | LUSC | R0 | Stage IA  | MX | N0 | T1 | Yes | Dead | MALE   | BLACK<br>AFRICAN<br>AMERICAN | OR | 83 | 3376 |
| TCGA-33-<br>AASI-01A-22R-<br>A405-07 | Tumor | LUSC | RX | Stage IIB | MX | N1 | T2 | Yes | Dead | FEMALE | BLACK<br>AFRICAN<br>AMERICAN | OR | 65 | 1344 |

|                                      |       |      |    |           |    |    |    |     |      |        |                                    |    |      |
|--------------------------------------|-------|------|----|-----------|----|----|----|-----|------|--------|------------------------------------|----|------|
| TCGA-33-<br>AASJ-01A-<br>11R-A405-07 | Tumor | LUSC | R0 | Stage IB  | MX | N0 | T2 | Yes | Dead | MALE   | BLACK<br>OR<br>AFRICAN<br>AMERICAN | 60 | 3600 |
| TCGA-33-<br>AASL-01A-<br>11R-A405-07 | Tumor | LUSC | R0 | Stage IA  | MX | N0 | T1 | Yes | Dead | FEMALE | BLACK<br>OR<br>AFRICAN<br>AMERICAN | 57 | 826  |
| TCGA-34-<br>2596-01A-01R-<br>0851-07 | Tumor | LUSC | R0 | Stage IIB | M0 | N1 | T2 | Yes | Dead | MALE   | WHITE                              | 70 | 80   |
| TCGA-34-<br>2600-01A-01R-<br>0851-07 | Tumor | LUSC | R0 | Stage IA  | M0 | N0 | T1 | Yes | Dead | FEMALE | WHITE                              | 76 | 1874 |
| TCGA-34-<br>2608-01A-02R-<br>0851-07 | Tumor | LUSC | R0 | Stage IB  | M0 | N0 | T2 | Yes | Dead | MALE   | WHITE                              | 84 | 1000 |



|                              |       |      |               |            |    |    |    |               |       |        |                           |    |      |
|------------------------------|-------|------|---------------|------------|----|----|----|---------------|-------|--------|---------------------------|----|------|
| TCGA-34-5231-01A-21R-1820-07 | Tumor | LUSC | Not Available | Stage IA   | M0 | N0 | T1 | Yes           | Alive | MALE   | WHITE                     | 72 | 1984 |
| TCGA-34-5232-01A-21R-1820-07 | Tumor | LUSC | Not Available | Stage IIA  | M0 | N1 | T1 | Not Available | Alive | FEMALE | BLACK OR AFRICAN AMERICAN | 75 | 2471 |
| TCGA-34-5234-01A-01R-1635-07 | Tumor | LUSC | R0            | Stage IA   | M0 | N0 | T1 | Yes           | Alive | FEMALE | WHITE                     | 71 | 2271 |
| TCGA-34-5236-01A-21R-1820-07 | Tumor | LUSC | Not Available | Stage IIB  | M0 | N0 | T3 | Not Available | Dead  | MALE   | WHITE                     | 60 | 276  |
| TCGA-34-5239-01A-21R-1820-07 | Tumor | LUSC | Not Available | Stage IIIA | M0 | N0 | T4 | Not Available | Alive | MALE   | WHITE                     | 75 | 1834 |
| TCGA-34-5240-01A-01R-1443-07 | Tumor | LUSC | Not Available | Stage IIB  | M0 | N1 | T2 | Yes           | Alive | FEMALE | WHITE                     | 73 | 1541 |

|                              |        |      |               |            |    |    |     |               |       |        |       |    |      |
|------------------------------|--------|------|---------------|------------|----|----|-----|---------------|-------|--------|-------|----|------|
| TCGA-34-5241-01A-01R-1443-07 | Tumor  | LUSC | Not Available | Stage IB   | M0 | N0 | T2  | Yes           | Alive | MALE   | WHITE | 79 | 515  |
| TCGA-34-5927-01A-11R-1820-07 | Tumor  | LUSC | Not Available | Stage IA   | M0 | N0 | T1  | Not Available | Alive | FEMALE | WHITE | 70 | 1361 |
| TCGA-34-5928-01A-11R-1820-07 | Tumor  | LUSC | Not Available | Stage IIB  | M0 | N1 | T2  | Yes           | Alive | FEMALE | WHITE | 83 | 1196 |
| TCGA-34-5929-01A-11R-1820-07 | Tumor  | LUSC | Not Available | Stage IB   | M0 | N0 | T2  | Yes           | Dead  | FEMALE | WHITE | 78 | 151  |
| TCGA-34-7107-01A-11R-1949-07 | Tumor  | LUSC | Not Available | Stage II   | M0 | N0 | T2a | Yes           | Dead  | MALE   | WHITE | 70 | 34   |
| TCGA-34-7107-11A-01R-1949-07 | Normal | LUSC | Not Available | Stage II   | M0 | N0 | T2a | Yes           | Dead  | MALE   | WHITE | 70 | 34   |
| TCGA-34-8454-01A-11R-2326-07 | Tumor  | LUSC | R0            | Stage IIIA | M0 | N1 | T3  | Yes           | Alive | FEMALE | WHITE | 62 | 1180 |

|                              |        |      |               |            |               |    |     |               |       |        |       |    |      |
|------------------------------|--------|------|---------------|------------|---------------|----|-----|---------------|-------|--------|-------|----|------|
| TCGA-34-8454-11A-01R-2326-07 | Normal | LUSC | R0            | Stage IIIA | M0            | N1 | T3  | Yes           | Alive | FEMALE | WHITE | 62 | 1180 |
| TCGA-34-8455-01A-11R-2326-07 | Tumor  | LUSC | R0            | Stage IV   | M1a           | N0 | T4  | Yes           | Dead  | MALE   | WHITE | 67 | 123  |
| TCGA-34-8456-01A-21R-2326-07 | Tumor  | LUSC | R0            | Stage IIA  | M0            | N1 | T2a | Yes           | Alive | FEMALE | WHITE | 71 | 804  |
| TCGA-34-A5IX-01A-12R-A27Q-07 | Tumor  | LUSC | Not Available | Stage IIB  | M0            | N0 | T3  | Yes           | Alive | MALE   | WHITE | 80 | 1031 |
| TCGA-37-3783-01A-01R-1201-07 | Tumor  | LUSC | R0            | Stage IIIA | M0            | N2 | T3  | Not Available | Alive | MALE   | WHITE | 51 | 122  |
| TCGA-37-3789-01A-01R-0980-07 | Tumor  | LUSC | R0            | Stage IB   | Not Available | N0 | T2  | No            | Alive | MALE   | WHITE | 65 | 13   |
| TCGA-37-3792-01A-01R-0980-07 | Tumor  | LUSC | R0            | Stage IB   | M0            | N0 | T2  | No            | Alive | MALE   | WHITE | 69 | 12   |

|                              |       |      |    |            |    |    |     |     |       |        |       |    |     |
|------------------------------|-------|------|----|------------|----|----|-----|-----|-------|--------|-------|----|-----|
| TCGA-37-4129-01A-01R-1100-07 | Tumor | LUSC | R0 | Stage IA   | M0 | N0 | T1b | Yes | Alive | FEMALE | WHITE | 52 | 242 |
| TCGA-37-4130-01A-01R-1100-07 | Tumor | LUSC | R0 | Stage IA   | M0 | N0 | T1b | Yes | Alive | MALE   | WHITE | 56 | 247 |
| TCGA-37-4132-01A-01R-1100-07 | Tumor | LUSC | R0 | Stage IV   | M1 | N0 | T2  | No  | Alive | FEMALE | WHITE | 61 | 227 |
| TCGA-37-4133-01A-01R-1100-07 | Tumor | LUSC | R0 | Stage IIIA | M0 | N0 | T4  | Yes | Alive | MALE   | WHITE | 63 | 238 |
| TCGA-37-4135-01A-01R-1100-07 | Tumor | LUSC | R0 | Stage IB   | M0 | N0 | T2a | Yes | Alive | MALE   | WHITE | 68 | 207 |
| TCGA-37-4141-01A-02R-1100-07 | Tumor | LUSC | R0 | Stage IA   | M0 | N0 | T1b | No  | Alive | FEMALE | WHITE | 65 | 12  |
| TCGA-37-5819-01A-01R-1635-07 | Tumor | LUSC | R0 | Stage IIIA | M0 | N2 | T2  | Yes | Alive | MALE   | WHITE | 64 | 103 |

|                                      |       |      |                  |            |    |    |     |         |       |        |       |    |      |
|--------------------------------------|-------|------|------------------|------------|----|----|-----|---------|-------|--------|-------|----|------|
| TCGA-37-<br>A5EL-01A-11R-<br>A26W-07 | Tumor | LUSC | Not<br>Evaluated | Stage IIB  | M0 | N0 | T3  | Unknown | Alive | MALE   | WHITE | 53 | 1143 |
| TCGA-37-<br>A5EM-01A-<br>21R-A27Q-07 | Tumor | LUSC | Not<br>Evaluated | Stage II   | M0 | N0 | T2  | Unknown | Alive | MALE   | WHITE | 49 | 867  |
| TCGA-37-<br>A5EN-01A-<br>21R-A26W-07 | Tumor | LUSC | Not<br>Available | Stage IIIB | M0 | N2 | T4  | Unknown | Alive | MALE   | WHITE | 59 | 660  |
| TCGA-39-<br>5011-01A-01R-<br>1443-07 | Tumor | LUSC | R0               | Stage IA   | M0 | N0 | T1b | Yes     | Alive | FEMALE | WHITE | 70 | 4053 |
| TCGA-39-<br>5016-01A-01R-<br>1443-07 | Tumor | LUSC | R0               | Stage IIA  | M0 | N1 | T2a | Yes     | Alive | MALE   | WHITE | 44 | 3850 |
| TCGA-39-<br>5019-01A-01R-<br>1820-07 | Tumor | LUSC | R0               | Stage IB   | M0 | N0 | T2a | Yes     | Alive | MALE   | WHITE | 70 | 3387 |
| TCGA-39-<br>5021-01A-01R-<br>1443-07 | Tumor | LUSC | R0               | Stage IB   | M0 | N0 | T2a | Yes     | Dead  | MALE   | WHITE | 70 | 2086 |

|                              |       |      |    |            |    |    |     |     |       |        |               |    |      |
|------------------------------|-------|------|----|------------|----|----|-----|-----|-------|--------|---------------|----|------|
| TCGA-39-5022-01A-21R-1820-07 | Tumor | LUSC | R0 | Stage IB   | M0 | N0 | T2a | Yes | Dead  | MALE   | WHITE         | 76 | 1679 |
| TCGA-39-5024-01A-21R-1820-07 | Tumor | LUSC | R0 | Stage IIIA | M0 | N2 | T2a | Yes | Alive | FEMALE | WHITE         | 65 | 2510 |
| TCGA-39-5027-01A-21R-1820-07 | Tumor | LUSC | R0 | Stage IB   | M0 | N0 | T2a | Yes | Alive | MALE   | WHITE         | 73 | 3108 |
| TCGA-39-5028-01A-01R-1443-07 | Tumor | LUSC | R0 | Stage IIIA | M0 | N1 | T4  | Yes | Dead  | MALE   | WHITE         | 75 | 52   |
| TCGA-39-5029-01A-01R-1443-07 | Tumor | LUSC | R0 | Stage IIIA | M0 | N2 | T1b | Yes | Dead  | MALE   | WHITE         | 67 | 740  |
| TCGA-39-5030-01A-01R-1443-07 | Tumor | LUSC | R0 | Stage IIIA | M0 | N2 | T2a | Yes | Dead  | FEMALE | ASIAN         | 81 | 59   |
| TCGA-39-5031-01A-01R-1443-07 | Tumor | LUSC | R0 | Stage IA   | M0 | N0 | T1a | Yes | Alive | FEMALE | Not Available | 76 | 1841 |

|                              |        |      |    |            |    |    |     |     |       |        |       |    |      |
|------------------------------|--------|------|----|------------|----|----|-----|-----|-------|--------|-------|----|------|
| TCGA-39-5034-01A-01R-1443-07 | Tumor  | LUSC | R0 | Stage IIB  | M0 | N0 | T3  | Yes | Dead  | FEMALE | WHITE | 73 | 1107 |
| TCGA-39-5035-01A-01R-1443-07 | Tumor  | LUSC | R0 | Stage IA   | M0 | N0 | T1b | Yes | Alive | FEMALE | WHITE | 72 | 2080 |
| TCGA-39-5036-01A-01R-1443-07 | Tumor  | LUSC | R0 | Stage IB   | M0 | N0 | T2  | Yes | Alive | MALE   | WHITE | 73 | 2165 |
| TCGA-39-5037-01A-01R-1443-07 | Tumor  | LUSC | R0 | Stage IIA  | M0 | N1 | T1b | Yes | Alive | MALE   | WHITE | 65 | 1690 |
| TCGA-39-5039-01A-01R-1443-07 | Tumor  | LUSC | R0 | Stage IIA  | M0 | N0 | T2b | Yes | Dead  | MALE   | WHITE | 76 | 544  |
| TCGA-39-5040-01A-21R-2125-07 | Tumor  | LUSC | R0 | Stage IIIA | M0 | N2 | T2a | Yes | Dead  | MALE   | WHITE | 59 | 519  |
| TCGA-39-5040-11A-01R-2125-07 | Normal | LUSC | R0 | Stage IIIA | M0 | N2 | T2a | Yes | Dead  | MALE   | WHITE | 59 | 519  |

|                              |       |      |               |            |    |    |     |     |       |        |                           |    |      |
|------------------------------|-------|------|---------------|------------|----|----|-----|-----|-------|--------|---------------------------|----|------|
| TCGA-43-2576-01A-01R-A32Z-07 | Tumor | LUSC | R0            | Stage IIIA | M0 | N2 | T2  | Yes | Alive | FEMALE | WHITE                     | 62 | 1223 |
| TCGA-43-2578-01A-01R-0851-07 | Tumor | LUSC | R0            | Stage IA   | M0 | N0 | T1  | Yes | Alive | FEMALE | WHITE                     | 59 | 684  |
| TCGA-43-2581-01A-01R-0851-07 | Tumor | LUSC | R0            | Stage IIIA | M0 | N1 | T3  | Yes | Alive | FEMALE | WHITE                     | 47 | 1176 |
| TCGA-43-3394-01A-01R-0980-07 | Tumor | LUSC | R0            | Stage IB   | M0 | N0 | T2a | Yes | Alive | MALE   | BLACK OR AFRICAN AMERICAN | 52 | 1190 |
| TCGA-43-3920-01A-01R-0980-07 | Tumor | LUSC | R0            | Stage IB   | M0 | N0 | T2  | Yes | Alive | MALE   | WHITE                     | 71 | 1007 |
| TCGA-43-5668-01A-01R-1635-07 | Tumor | LUSC | Not Available | Stage IIA  | M0 | N1 | T1b | Yes | Alive | MALE   | WHITE                     | 78 | 559  |



|                              |        |      |               |           |    |    |     |     |       |        |       |    |     |
|------------------------------|--------|------|---------------|-----------|----|----|-----|-----|-------|--------|-------|----|-----|
| TCGA-43-5670-01A-21R-2125-07 | Tumor  | LUSC | Not Available | Stage IIA | M0 | N0 | T2b | Yes | Alive | MALE   | WHITE | 70 | 849 |
| TCGA-43-5670-11A-01R-2125-07 | Normal | LUSC | Not Available | Stage IIA | M0 | N0 | T2b | Yes | Alive | MALE   | WHITE | 70 | 849 |
| TCGA-43-6143-01A-11R-1820-07 | Tumor  | LUSC | RX            | Stage IB  | M0 | N0 | T2  | Yes | Alive | MALE   | WHITE | 70 | 699 |
| TCGA-43-6143-11A-01R-1820-07 | Normal | LUSC | RX            | Stage IB  | M0 | N0 | T2  | Yes | Alive | MALE   | WHITE | 70 | 699 |
| TCGA-43-6647-01A-11R-1820-07 | Tumor  | LUSC | RX            | Stage IIB | MX | N1 | T2b | Yes | Alive | FEMALE | WHITE | 69 | 757 |
| TCGA-43-6647-11A-01R-1820-07 | Normal | LUSC | RX            | Stage IIB | MX | N1 | T2b | Yes | Alive | FEMALE | WHITE | 69 | 757 |

|                              |        |      |               |           |    |    |     |     |       |        |                           |    |     |
|------------------------------|--------|------|---------------|-----------|----|----|-----|-----|-------|--------|---------------------------|----|-----|
| TCGA-43-6770-01A-11R-1820-07 | Tumor  | LUSC | RX            | Stage IB  | MX | N0 | T2a | Yes | Alive | FEMALE | BLACK OR AFRICAN AMERICAN | 59 | 653 |
| TCGA-43-6771-01A-11R-1820-07 | Tumor  | LUSC | RX            | Stage IB  | MX | N0 | T2  | Yes | Dead  | MALE   | WHITE                     | 85 | 166 |
| TCGA-43-6771-11A-01R-1820-07 | Normal | LUSC | RX            | Stage IB  | MX | N0 | T2  | Yes | Dead  | MALE   | WHITE                     | 85 | 166 |
| TCGA-43-6773-01A-41R-1949-07 | Tumor  | LUSC | Not Available | Stage IIB | MX | N1 | T2  | Yes | Dead  | MALE   | WHITE                     | 76 | 116 |
| TCGA-43-6773-11A-01R-1949-07 | Normal | LUSC | Not Available | Stage IIB | MX | N1 | T2  | Yes | Dead  | MALE   | WHITE                     | 76 | 116 |
| TCGA-43-7656-01A-11R-2125-07 | Tumor  | LUSC | Not Available | Stage IA  | MX | N0 | T1b | Yes | Alive | MALE   | WHITE                     | 71 | 596 |

|                              |        |      |               |           |    |    |     |     |       |        |       |    |      |
|------------------------------|--------|------|---------------|-----------|----|----|-----|-----|-------|--------|-------|----|------|
| TCGA-43-7657-01A-31R-2125-07 | Tumor  | LUSC | Not Available | Stage IA  | MX | N0 | T1  | Yes | Alive | FEMALE | WHITE | 68 | 236  |
| TCGA-43-7657-11A-01R-2125-07 | Normal | LUSC | Not Available | Stage IA  | MX | N0 | T1  | Yes | Alive | FEMALE | WHITE | 68 | 236  |
| TCGA-43-7658-01A-11R-2125-07 | Tumor  | LUSC | Not Available | Stage IA  | M0 | N0 | T1  | Yes | Alive | FEMALE | WHITE | 75 | 2378 |
| TCGA-43-7658-11A-01R-2125-07 | Normal | LUSC | Not Available | Stage IA  | M0 | N0 | T1  | Yes | Alive | FEMALE | WHITE | 75 | 2378 |
| TCGA-43-8115-01A-11R-2247-07 | Tumor  | LUSC | R0            | Stage IIA | MX | N1 | T2a | Yes | Alive | FEMALE | WHITE | 72 | 407  |
| TCGA-43-8116-01A-11R-2247-07 | Tumor  | LUSC | Not Available | Stage IA  | M0 | N0 | T1b | Yes | Alive | MALE   | WHITE | 73 | 358  |
| TCGA-43-8118-01A-11R-2403-07 | Tumor  | LUSC | Not Evaluated | Stage IA  | M0 | N0 | T1b | Yes | Dead  | FEMALE | WHITE | 55 | 89   |

|                                      |       |      |                  |            |    |    |     |     |       |        |                                 |    |     |
|--------------------------------------|-------|------|------------------|------------|----|----|-----|-----|-------|--------|---------------------------------|----|-----|
| TCGA-43-<br>A474-01A-11R-<br>A24H-07 | Tumor | LUSC | R0               | Stage IIA  | M0 | N0 | T2b | Yes | Alive | MALE   | WHITE                           | 66 | 353 |
| TCGA-43-<br>A475-01A-11R-<br>A24H-07 | Tumor | LUSC | R1               | Stage IIB  | M0 | N0 | T3  | Yes | Alive | FEMALE | WHITE                           | 67 | 296 |
| TCGA-43-<br>A56U-01A-<br>11R-A26W-07 | Tumor | LUSC | R0               | Stage IA   | MX | N0 | T1b | Yes | Alive | FEMALE | WHITE                           | 76 | 432 |
| TCGA-43-<br>A56V-01A-11R-<br>A26W-07 | Tumor | LUSC | Not<br>Available | Stage IIIA | M0 | N2 | T2a | Yes | Alive | MALE   | BLACK OR<br>AFRICAN<br>AMERICAN | 61 | 366 |
| TCGA-46-<br>3765-01A-01R-<br>0980-07 | Tumor | LUSC | R0               | Stage IA   | M0 | N0 | T1  | Yes | Alive | FEMALE | WHITE                           | 59 | 405 |
| TCGA-46-<br>3766-01A-01R-<br>0980-07 | Tumor | LUSC | R0               | Stage IA   | M0 | N0 | T1  | Yes | Alive | FEMALE | WHITE                           | 62 | 370 |

|                              |       |      |    |             |               |    |     |     |       |        |                           |    |     |
|------------------------------|-------|------|----|-------------|---------------|----|-----|-----|-------|--------|---------------------------|----|-----|
| TCGA-46-3767-01A-01R-0980-07 | Tumor | LUSC | R0 | Stage IA    | M0            | N0 | T1a | Yes | Alive | MALE   | WHITE                     | 76 | 396 |
| TCGA-46-3768-01A-01R-0980-07 | Tumor | LUSC | R0 | Stage IIIA  | M0            | N1 | T3  | Yes | Dead  | MALE   | WHITE                     | 58 | 299 |
| TCGA-46-3769-01A-01R-0980-07 | Tumor | LUSC | R1 | Discrepancy | M0            | N0 | T4  | Yes | Alive | MALE   | WHITE                     | 57 | 135 |
| TCGA-46-6025-01A-11R-1820-07 | Tumor | LUSC | R0 | Stage IIB   | M0            | N1 | T2b | Yes | Alive | MALE   | WHITE                     | 71 | 324 |
| TCGA-46-6026-01A-11R-1820-07 | Tumor | LUSC | R2 | Stage IIB   | M0            | N1 | T2a | Yes | Alive | MALE   | WHITE                     | 81 | 423 |
| TCGA-51-4079-01A-01R-1100-07 | Tumor | LUSC | R0 | Stage IB    | Not Available | N0 | T2  | Yes | Dead  | FEMALE | BLACK OR AFRICAN AMERICAN | 73 | 12  |

|                              |        |      |    |            |               |    |     |     |       |        |                           |    |      |
|------------------------------|--------|------|----|------------|---------------|----|-----|-----|-------|--------|---------------------------|----|------|
| TCGA-51-4079-11A-01R-1758-07 | Normal | LUSC | R0 | Stage IB   | Not Available | N0 | T2  | Yes | Dead  | FEMALE | BLACK OR AFRICAN AMERICAN | 73 | 12   |
| TCGA-51-4080-01A-01R-1100-07 | Tumor  | LUSC | R0 | Stage IIIB | Not Available | N1 | T4  | Yes | Dead  | MALE   | BLACK OR AFRICAN AMERICAN | 65 | 12   |
| TCGA-51-4081-01A-01R-1100-07 | Tumor  | LUSC | R0 | Stage IIB  | M0            | N1 | T2a | Yes | Alive | MALE   | WHITE                     | 55 | 911  |
| TCGA-51-4081-11A-01R-1758-07 | Normal | LUSC | R0 | Stage IIB  | M0            | N1 | T2a | Yes | Alive | MALE   | WHITE                     | 55 | 911  |
| TCGA-51-6867-01A-11R-2045-07 | Tumor  | LUSC | R0 | Stage I    | M0            | N0 | T1  | Yes | Dead  | FEMALE | WHITE                     | 72 | 1856 |

|                              |       |      |               |             |    |    |     |     |       |        |       |    |     |
|------------------------------|-------|------|---------------|-------------|----|----|-----|-----|-------|--------|-------|----|-----|
| TCGA-52-7622-01A-11R-2125-07 | Tumor | LUSC | R0            | Stage IA    | M0 | N0 | T1a | Yes | Alive | FEMALE | WHITE | 62 | 862 |
| TCGA-52-7809-01A-21R-2125-07 | Tumor | LUSC | R0            | Stage IB    | M0 | N0 | T2  | Yes | Dead  | MALE   | WHITE | 74 | 166 |
| TCGA-52-7810-01A-11R-2125-07 | Tumor | LUSC | Not Available | Stage IIB   | M0 | N0 | T3  | Yes | Alive | FEMALE | WHITE | 60 | 923 |
| TCGA-52-7811-01A-11R-2125-07 | Tumor | LUSC | R0            | Stage IB    | M0 | N0 | T2  | Yes | Dead  | MALE   | WHITE | 67 | 266 |
| TCGA-52-7812-01A-11R-2125-07 | Tumor | LUSC | R0            | Discrepancy | M0 | N2 | T2  | Yes | Dead  | MALE   | WHITE | 68 | 835 |
| TCGA-56-1622-01A-01R-0692-07 | Tumor | LUSC | R0            | Stage IB    | M0 | N0 | T2  | Yes | Dead  | MALE   | WHITE | 58 | 881 |
| TCGA-56-5897-01A-11R-1635-07 | Tumor | LUSC | Not Available | Stage IA    | MX | N0 | T1b | Yes | Alive | MALE   | WHITE | 74 | 378 |

|                              |        |      |               |            |    |    |     |     |       |        |       |    |     |
|------------------------------|--------|------|---------------|------------|----|----|-----|-----|-------|--------|-------|----|-----|
| TCGA-56-5898-01A-11R-1635-07 | Tumor  | LUSC | R0            | Stage IA   | M0 | N0 | T1b | Yes | Alive | MALE   | WHITE | 69 | 555 |
| TCGA-56-6545-01A-11R-1820-07 | Tumor  | LUSC | R0            | Stage IB   | M0 | N0 | T2a | Yes | Alive | FEMALE | WHITE | 77 | 666 |
| TCGA-56-6546-01A-11R-1820-07 | Tumor  | LUSC | Not Available | Stage IIA  | MX | N0 | T2b | Yes | Alive | MALE   | WHITE | 67 |     |
| TCGA-56-7221-01A-11R-2045-07 | Tumor  | LUSC | R0            | Stage IB   | M0 | N0 | T2  | Yes | Alive | MALE   | WHITE | 79 | 608 |
| TCGA-56-7222-01A-11R-2045-07 | Tumor  | LUSC | Not Available | Stage IB   | M0 | N0 | T2a | Yes | Alive | MALE   | WHITE | 60 | 562 |
| TCGA-56-7222-11A-01R-2045-07 | Normal | LUSC | Not Available | Stage IB   | M0 | N0 | T2a | Yes | Alive | MALE   | WHITE | 60 | 562 |
| TCGA-56-7223-01A-11R-2045-07 | Tumor  | LUSC | R0            | Stage IIIA | MX | N1 | T3  | Yes | Alive | MALE   | WHITE | 66 | 442 |



|                              |        |      |    |            |    |    |     |     |       |      |       |    |     |
|------------------------------|--------|------|----|------------|----|----|-----|-----|-------|------|-------|----|-----|
| TCGA-56-7579-01A-11R-2045-07 | Tumor  | LUSC | R0 | Stage IIIA | M0 | N1 | T3  | Yes | Alive | MALE | WHITE | 61 | 951 |
| TCGA-56-7579-11A-01R-2045-07 | Normal | LUSC | R0 | Stage IIIA | M0 | N1 | T3  | Yes | Alive | MALE | WHITE | 61 | 951 |
| TCGA-56-7580-01A-11R-2045-07 | Tumor  | LUSC | R0 | Stage IB   | M0 | N0 | T2a | Yes | Alive | MALE | WHITE | 84 | 925 |
| TCGA-56-7580-11A-01R-2045-07 | Normal | LUSC | R0 | Stage IB   | M0 | N0 | T2a | Yes | Alive | MALE | WHITE | 84 | 925 |
| TCGA-56-7582-01A-11R-2045-07 | Tumor  | LUSC | R0 | Stage IB   | M0 | N0 | T2a | Yes | Alive | MALE | WHITE | 83 | 601 |
| TCGA-56-7582-11A-01R-2045-07 | Normal | LUSC | R0 | Stage IB   | M0 | N0 | T2a | Yes | Alive | MALE | WHITE | 83 | 601 |
| TCGA-56-7730-01A-11R-2125-07 | Tumor  | LUSC | R1 | Stage IIA  | M0 | N0 | T2b | Yes | Alive | MALE | WHITE | 73 | 198 |

|                              |        |      |               |           |    |    |     |     |       |        |                           |    |      |
|------------------------------|--------|------|---------------|-----------|----|----|-----|-----|-------|--------|---------------------------|----|------|
| TCGA-56-7730-11A-01R-2125-07 | Normal | LUSC | R1            | Stage IIA | M0 | N0 | T2b | Yes | Alive | MALE   | WHITE                     | 73 | 198  |
| TCGA-56-7731-01A-11R-2125-07 | Tumor  | LUSC | Not Available | Stage IB  | MX | N0 | T2a | Yes | Alive | FEMALE | WHITE                     | 66 | 3    |
| TCGA-56-7731-11A-01R-2125-07 | Normal | LUSC | Not Available | Stage IB  | MX | N0 | T2a | Yes | Alive | FEMALE | WHITE                     | 66 | 3    |
| TCGA-56-7822-01A-11R-2125-07 | Tumor  | LUSC | R0            | Stage IIB | M0 | N1 | T2b | Yes | Alive | MALE   | BLACK OR AFRICAN AMERICAN | 75 | 532  |
| TCGA-56-7823-01B-11R-2247-07 | Tumor  | LUSC | Not Available | Stage IIA | M0 | N1 | T1b | Yes | Alive | FEMALE | WHITE                     | 58 | 1011 |
| TCGA-56-7823-11A-01R-2247-07 | Normal | LUSC | Not Available | Stage IIA | M0 | N1 | T1b | Yes | Alive | FEMALE | WHITE                     | 58 | 1011 |

|                              |        |      |    |           |    |    |     |     |       |        |       |    |     |
|------------------------------|--------|------|----|-----------|----|----|-----|-----|-------|--------|-------|----|-----|
| TCGA-56-8082-01A-11R-2247-07 | Tumor  | LUSC | R0 | Stage IIA | MX | N0 | T2b | Yes | Alive | FEMALE | WHITE | 80 | 455 |
| TCGA-56-8082-11A-01R-2247-07 | Normal | LUSC | R0 | Stage IIA | MX | N0 | T2b | Yes | Alive | FEMALE | WHITE | 80 | 455 |
| TCGA-56-8083-01A-11R-2247-07 | Tumor  | LUSC | R0 | Stage IB  | MX | N0 | T2a | Yes | Alive | MALE   | WHITE | 56 | 150 |
| TCGA-56-8083-11A-01R-2247-07 | Normal | LUSC | R0 | Stage IB  | MX | N0 | T2a | Yes | Alive | MALE   | WHITE | 56 | 150 |
| TCGA-56-8201-01A-11R-2247-07 | Tumor  | LUSC | R0 | Stage IIB | MX | N0 | T3  | Yes | Alive | MALE   | WHITE | 74 | 397 |
| TCGA-56-8201-11A-01R-2247-07 | Normal | LUSC | R0 | Stage IIB | MX | N0 | T3  | Yes | Alive | MALE   | WHITE | 74 | 397 |
| TCGA-56-8304-01A-11R-2326-07 | Tumor  | LUSC | R0 | Stage IA  | MX | N0 | T1b | Yes | Alive | FEMALE | WHITE | 73 | 106 |

|                              |        |      |    |           |    |    |     |     |       |        |       |    |     |
|------------------------------|--------|------|----|-----------|----|----|-----|-----|-------|--------|-------|----|-----|
| TCGA-56-8305-01A-11R-2296-07 | Tumor  | LUSC | R0 | Stage IB  | M0 | N0 | T2a | Yes | Alive | MALE   | WHITE | 72 | 105 |
| TCGA-56-8307-01A-11R-2296-07 | Tumor  | LUSC | R0 | Stage IIB | M0 | N0 | T3  | Yes | Alive | FEMALE | WHITE | 55 | 818 |
| TCGA-56-8308-01A-11R-2296-07 | Tumor  | LUSC | R1 | Stage IIB | MX | N0 | T3  | Yes | Alive | MALE   | WHITE | 79 | 517 |
| TCGA-56-8309-01A-11R-2296-07 | Tumor  | LUSC | R0 | Stage IA  | MX | N0 | T1b | Yes | Alive | MALE   | WHITE | 66 | 428 |
| TCGA-56-8309-11A-01R-2296-07 | Normal | LUSC | R0 | Stage IA  | MX | N0 | T1b | Yes | Alive | MALE   | WHITE | 66 | 428 |
| TCGA-56-8503-01A-11R-2403-07 | Tumor  | LUSC | R0 | Stage IIB | M0 | N0 | T3  | Yes | Alive | FEMALE | WHITE | 76 | 41  |
| TCGA-56-8504-01A-11R-2403-07 | Tumor  | LUSC | R0 | Stage IB  | MX | N0 | T2a | Yes | Alive | MALE   | WHITE | 74 | 510 |

|                              |        |      |    |            |    |    |     |     |       |        |       |    |     |
|------------------------------|--------|------|----|------------|----|----|-----|-----|-------|--------|-------|----|-----|
| TCGA-56-8622-01A-11R-2403-07 | Tumor  | LUSC | R0 | Stage IB   | M0 | N0 | T2a | Yes | Alive | MALE   | WHITE | 68 | 55  |
| TCGA-56-8623-01A-11R-A28V-07 | Tumor  | LUSC | R0 | Stage IB   | MX | N0 | T2a | Yes | Alive | MALE   | WHITE | 71 | 692 |
| TCGA-56-8623-11A-01R-A28V-07 | Normal | LUSC | R0 | Stage IB   | MX | N0 | T2a | Yes | Alive | MALE   | WHITE | 71 | 692 |
| TCGA-56-8624-01A-11R-2403-07 | Tumor  | LUSC | R0 | Stage IIB  | MX | N0 | T3  | Yes | Alive | MALE   | WHITE | 84 | 420 |
| TCGA-56-8625-01A-11R-2403-07 | Tumor  | LUSC | RX | Stage IIIA | MX | N1 | T3  | Yes | Alive | FEMALE | WHITE | 66 | 315 |
| TCGA-56-8626-01A-11R-2403-07 | Tumor  | LUSC | R0 | Stage IA   | MX | N0 | T1a | Yes | Alive | MALE   | WHITE | 59 | 302 |
| TCGA-56-8628-01A-11R-2403-07 | Tumor  | LUSC | R0 | Stage IA   | MX | N0 | T1b | Yes | Alive | MALE   | WHITE | 78 | 616 |

|                              |       |      |    |            |    |    |     |     |       |        |       |    |     |
|------------------------------|-------|------|----|------------|----|----|-----|-----|-------|--------|-------|----|-----|
| TCGA-56-8629-01A-11R-2403-07 | Tumor | LUSC | R0 | Stage IIA  | MX | N0 | T2b | Yes | Alive | MALE   | WHITE | 63 | 481 |
| TCGA-56-A49D-01A-11R-A24H-07 | Tumor | LUSC | R0 | Stage IIIA | MX | N2 | T2a | Yes | Alive | MALE   | WHITE | 67 | 637 |
| TCGA-56-A4BW-01A-11R-A24H-07 | Tumor | LUSC | R0 | Stage IIA  | M0 | N1 | T2a | Yes | Alive | MALE   | WHITE | 55 | 585 |
| TCGA-56-A4BX-01A-11R-A24H-07 | Tumor | LUSC | R0 | Stage IIA  | MX | N0 | T2b | Yes | Alive | MALE   | WHITE | 70 | 405 |
| TCGA-56-A4BY-01A-11R-A24H-07 | Tumor | LUSC | RX | Stage IB   | MX | N0 | T2a | Yes | Alive | MALE   | WHITE | 66 | 543 |
| TCGA-56-A4ZJ-01A-11R-A262-07 | Tumor | LUSC | R0 | Stage IA   | M0 | N0 | T1a | Yes | Alive | FEMALE | WHITE | 75 | 640 |
| TCGA-56-A4ZK-01A-11R-A262-07 | Tumor | LUSC | R1 | Stage IB   | M0 | N0 | T2  | Yes | Alive | FEMALE | WHITE | 76 | 570 |

|                                      |        |      |    |           |    |    |     |     |       |        |                                 |    |     |
|--------------------------------------|--------|------|----|-----------|----|----|-----|-----|-------|--------|---------------------------------|----|-----|
| TCGA-56-<br>A5DR-01A-<br>11R-A27Q-07 | Tumor  | LUSC | R0 | Stage IA  | MX | N0 | T1a | No  | Alive | MALE   | WHITE                           | 81 | 4   |
| TCGA-56-<br>A5DS-01A-<br>11R-A27Q-07 | Tumor  | LUSC | R0 | Stage IB  | MX | N0 | T2a | Yes | Alive | FEMALE | WHITE                           | 72 | 8   |
| TCGA-56-<br>A62T-01A-11R-<br>A405-07 | Tumor  | LUSC | R1 | Stage IIA | MX | N0 | T2b | Yes | Alive | MALE   | BLACK OR<br>AFRICAN<br>AMERICAN | 78 | 440 |
| TCGA-58-<br>8386-01A-11R-<br>2296-07 | Tumor  | LUSC | R0 | Stage IV  | M1 | NX | T3  | Yes | Dead  | MALE   | Not<br>Evaluated                | 75 | 1   |
| TCGA-58-<br>8386-11A-01R-<br>2296-07 | Normal | LUSC | R0 | Stage IV  | M1 | NX | T3  | Yes | Dead  | MALE   | Not<br>Evaluated                | 75 | 1   |
| TCGA-58-<br>8387-01A-11R-<br>2296-07 | Tumor  | LUSC | R0 | Stage IIA | M0 | N0 | T2b | Yes | Dead  | MALE   | WHITE                           | 60 | 403 |

|                              |       |      |    |            |    |    |     |     |       |        |       |    |      |
|------------------------------|-------|------|----|------------|----|----|-----|-----|-------|--------|-------|----|------|
| TCGA-58-8388-01A-11R-2326-07 | Tumor | LUSC | R0 | Stage IB   | M0 | N0 | T2a | Yes | Alive | MALE   | WHITE | 60 | 412  |
| TCGA-58-8390-01A-11R-2326-07 | Tumor | LUSC | R0 | Stage IIA  | M0 | N0 | T2b | Yes | Alive | MALE   | WHITE | 70 | 911  |
| TCGA-58-8391-01A-11R-2326-07 | Tumor | LUSC | R0 | Stage IIIA | M0 | N2 | T2  | Yes | Alive | FEMALE | WHITE | 57 | 2167 |
| TCGA-58-8392-01A-11R-2326-07 | Tumor | LUSC | R0 | Stage IB   | M0 | N0 | T2a | Yes | Dead  | MALE   | WHITE | 70 | 501  |
| TCGA-58-8393-01A-11R-2326-07 | Tumor | LUSC | R0 | Stage IB   | M0 | N0 | T2a | Yes | Alive | FEMALE | WHITE | 68 | 1058 |
| TCGA-58-A46J-01A-11R-A24H-07 | Tumor | LUSC | R0 | Stage IIB  | M0 | N1 | T2  | Yes | Alive | MALE   | WHITE | 64 | 2589 |
| TCGA-58-A46K-01A-11R-A24H-07 | Tumor | LUSC | R0 | Stage IIIA | M0 | N2 | T2  | Yes | Dead  | MALE   | WHITE | 59 | 1045 |



|                                      |       |      |    |            |    |    |     |                  |       |        |                                    |    |      |
|--------------------------------------|-------|------|----|------------|----|----|-----|------------------|-------|--------|------------------------------------|----|------|
| TCGA-58-<br>A46L-01A-11R-<br>A24H-07 | Tumor | LUSC | R0 | Stage IIIA | M0 | N2 | T2  | Yes              | Alive | MALE   | WHITE                              | 73 | 1723 |
| TCGA-58-<br>A46M-01A-<br>11R-A24H-07 | Tumor | LUSC | R0 | Stage IIB  | M0 | N1 | T2b | Yes              | Alive | MALE   | WHITE                              | 61 | 1072 |
| TCGA-58-<br>A46N-01A-<br>11R-A24H-07 | Tumor | LUSC | R0 | Stage IB   | M0 | N0 | T2a | Yes              | Alive | MALE   | WHITE                              | 52 | 910  |
| TCGA-60-<br>2695-01A-01R-<br>0851-07 | Tumor | LUSC | R0 | Stage IB   | M0 | N0 | T2  | Yes              | Alive | FEMALE | WHITE                              | 74 | 642  |
| TCGA-60-<br>2696-01A-01R-<br>0851-07 | Tumor | LUSC | RX | Stage IIA  | M0 | N0 | T2  | Yes              | Dead  | FEMALE | BLACK<br>OR<br>AFRICAN<br>AMERICAN | 76 | 109  |
| TCGA-60-<br>2697-01A-11R-<br>2125-07 | Tumor | LUSC | RX | Stage IIA  | M0 | N2 | T2  | Not<br>Available | Dead  | MALE   | WHITE                              | 41 | 372  |

|                              |       |      |               |           |    |    |    |     |       |        |               |    |      |
|------------------------------|-------|------|---------------|-----------|----|----|----|-----|-------|--------|---------------|----|------|
| TCGA-60-2698-01A-01R-0851-07 | Tumor | LUSC | RX            | Stage IIB | M0 | N1 | T2 | Yes | Dead  | MALE   | WHITE         | 62 | 311  |
| TCGA-60-2703-01A-11R-2045-07 | Tumor | LUSC | R0            | Stage IIB | M0 | N1 | T2 | Yes | Dead  | MALE   | WHITE         | 73 | 2945 |
| TCGA-60-2704-01A-11R-2045-07 | Tumor | LUSC | R0            | Stage IIB | M0 | N1 | T2 | Yes | Dead  | MALE   | WHITE         | 73 | 1154 |
| TCGA-60-2706-01A-01R-0851-07 | Tumor | LUSC | Not Available | Stage IA  | M0 | N0 | T1 | Yes | Alive | MALE   | WHITE         | 58 | 2820 |
| TCGA-60-2707-01A-01R-0851-07 | Tumor | LUSC | RX            | Stage IB  | M0 | N0 | T2 | Yes | Dead  | MALE   | Not Available | 70 | 667  |
| TCGA-60-2708-01A-01R-0851-07 | Tumor | LUSC | R0            | Stage IIB | M0 | N1 | T2 | Yes | Alive | FEMALE | WHITE         | 64 | 2447 |

|                              |        |      |                  |           |    |    |    |     |       |        |                              |    |    |      |
|------------------------------|--------|------|------------------|-----------|----|----|----|-----|-------|--------|------------------------------|----|----|------|
| TCGA-60-2709-01A-21R-1820-07 | Tumor  | LUSC | R0               | Stage IB  | MX | N0 | T2 | Yes | Alive | MALE   | BLACK<br>AFRICAN<br>AMERICAN | OR | 69 | 1505 |
| TCGA-60-2709-11A-01R-1820-07 | Normal | LUSC | R0               | Stage IB  | MX | N0 | T2 | Yes | Alive | MALE   | BLACK<br>AFRICAN<br>AMERICAN | OR | 69 | 1505 |
| TCGA-60-2710-01A-01R-0851-07 | Tumor  | LUSC | Not<br>Available | Stage IIA | M0 | N1 | T1 | Yes | Alive | FEMALE | WHITE                        |    | 67 | 2024 |
| TCGA-60-2711-01A-01R-0851-07 | Tumor  | LUSC | R0               | Stage IB  | M0 | N0 | T2 | Yes | Alive | FEMALE | WHITE                        |    | 64 | 1260 |
| TCGA-60-2712-01A-01R-0851-07 | Tumor  | LUSC | R0               | Stage IIB | M0 | N1 | T2 | Yes | Dead  | FEMALE | WHITE                        |    | 79 | 274  |

|                              |       |      |    |           |    |    |    |     |       |        |               |    |      |
|------------------------------|-------|------|----|-----------|----|----|----|-----|-------|--------|---------------|----|------|
| TCGA-60-2713-01A-01R-0851-07 | Tumor | LUSC | R0 | Stage IB  | M0 | N0 | T2 | Yes | Alive | MALE   | WHITE         | 64 | 1731 |
| TCGA-60-2714-01A-01R-0851-07 | Tumor | LUSC | R0 | Stage IIB | M0 | N1 | T2 | Yes | Alive | FEMALE | WHITE         | 66 | 1531 |
| TCGA-60-2715-01A-01R-0851-07 | Tumor | LUSC | RX | Stage IA  | M0 | N0 | T1 | Yes | Dead  | MALE   | WHITE         | 51 | 1075 |
| TCGA-60-2716-01A-01R-0851-07 | Tumor | LUSC | R0 | Stage IIB | M0 | N1 | T2 | No  | Alive | MALE   | Not Available | 39 | 1475 |
| TCGA-60-2719-01A-01R-0851-07 | Tumor | LUSC | R0 | Stage IB  | M0 | N0 | T1 | Yes | Alive | FEMALE | WHITE         | 83 | 1297 |
| TCGA-60-2720-01A-01R-0851-07 | Tumor | LUSC | R0 | Stage IB  | M0 | N0 | T2 | Yes | Alive | FEMALE | WHITE         | 60 | 97   |
| TCGA-60-2721-01A-01R-0851-07 | Tumor | LUSC | R0 | Stage IB  | M0 | N0 | T2 | Yes | Alive | MALE   | WHITE         | 73 | 983  |

|                              |       |      |    |            |    |    |    |     |       |        |               |               |      |
|------------------------------|-------|------|----|------------|----|----|----|-----|-------|--------|---------------|---------------|------|
| TCGA-60-2722-01A-01R-0851-07 | Tumor | LUSC | R0 | Stage IIB  | M0 | N1 | T2 | Yes | Alive | MALE   | WHITE         | 66            | 908  |
| TCGA-60-2723-01A-01R-0851-07 | Tumor | LUSC | R0 | Stage IB   | M0 | N0 | T2 | Yes | Alive | FEMALE | WHITE         | 74            | 1092 |
| TCGA-60-2724-01A-01R-0851-07 | Tumor | LUSC | R0 | Stage IIIA | M0 | N1 | T3 | Yes | Alive | MALE   | WHITE         | 47            | 717  |
| TCGA-60-2725-01A-01R-1201-07 | Tumor | LUSC | R0 | Stage IB   | M0 | N0 | T2 | Yes | Alive | MALE   | WHITE         | 74            | 816  |
| TCGA-60-2726-01A-01R-0851-07 | Tumor | LUSC | R0 | Stage IIA  | M0 | N1 | T2 | Yes | Dead  | MALE   | WHITE         | 56            | 358  |
| TCGA-63-5128-01A-01R-1443-07 | Tumor | LUSC | R0 | Stage IB   | M0 | N0 | T2 | Yes | Dead  | MALE   | Not Available | Not Available |      |
| TCGA-63-5131-01A-01R-1443-07 | Tumor | LUSC | R0 | Stage IIB  | M0 | N1 | T2 | Yes | Dead  | MALE   | Not Available | Not Available |      |

|                              |       |      |    |           |    |    |    |     |       |        |               |               |      |
|------------------------------|-------|------|----|-----------|----|----|----|-----|-------|--------|---------------|---------------|------|
| TCGA-63-6202-01A-11R-1820-07 | Tumor | LUSC | R0 | Stage IIA | M0 | N0 | T2 | Yes | Alive | MALE   | Not Available | Not Available | 1602 |
| TCGA-63-7020-01A-11R-1949-07 | Tumor | LUSC | R0 | Stage IA  | M0 | N0 | T1 | Yes | Alive | MALE   | Not Available | Not Available | 2133 |
| TCGA-63-7021-01A-11R-1949-07 | Tumor | LUSC | R0 | Stage IA  | M0 | N0 | T1 | Yes | Alive | MALE   | Not Available | Not Available | 2142 |
| TCGA-63-7022-01A-11R-1949-07 | Tumor | LUSC | R0 | Stage IA  | M0 | N0 | T1 | Yes | Alive | FEMALE | Not Available | Not Available | 2073 |
| TCGA-63-7023-01A-11R-1949-07 | Tumor | LUSC | R0 | Stage IIA | M0 | N1 | T1 | Yes | Alive | MALE   | Not Available | Not Available | 1682 |
| TCGA-63-A5M9-01A-11R-A26W-07 | Tumor | LUSC | RX | Stage IIB | M0 | N1 | T2 | Yes | Alive | FEMALE | Not Evaluated | Not Available | 0    |
| TCGA-63-A5MB-01A-11R-A26W-07 | Tumor | LUSC | R0 | Stage IB  | M0 | N0 | T2 | Yes | Alive | MALE   | Not Evaluated | 62            | 3123 |

|                                      |       |      |    |            |    |    |    |     |       |        |                  |    |      |
|--------------------------------------|-------|------|----|------------|----|----|----|-----|-------|--------|------------------|----|------|
| TCGA-63-<br>A5MG-01A-<br>12R-A27Q-07 | Tumor | LUSC | R0 | Stage IB   | M0 | N0 | T2 | Yes | Alive | MALE   | Not<br>Evaluated | 68 | 2148 |
| TCGA-63-<br>A5MH-01A-<br>12R-A27Q-07 | Tumor | LUSC | R0 | Stage IA   | M0 | N0 | T1 | Yes | Alive | MALE   | Not<br>Evaluated | 68 | 2026 |
| TCGA-63-<br>A5MI-01A-12R-<br>A27Q-07 | Tumor | LUSC | R0 | Stage IIIA | M0 | N2 | T2 | Yes | Alive | MALE   | Not<br>Evaluated | 65 | 1784 |
| TCGA-63-<br>A5MJ-01A-<br>11R-A27Q-07 | Tumor | LUSC | R0 | Stage IIB  | M0 | N1 | T2 | Yes | Alive | MALE   | Not<br>Evaluated | 54 | 1824 |
| TCGA-63-<br>A5ML-01A-<br>31R-A27Q-07 | Tumor | LUSC | R0 | Stage IB   | M0 | N0 | T2 | Yes | Alive | MALE   | Not<br>Evaluated | 68 | 1386 |
| TCGA-63-<br>A5MM-01A-<br>11R-A26W-07 | Tumor | LUSC | R0 | Stage IIB  | M0 | N1 | T2 | Yes | Dead  | FEMALE | Not<br>Evaluated | 69 | 456  |
| TCGA-63-<br>A5MN-01A-<br>22R-A27Q-07 | Tumor | LUSC | R1 | Stage IIB  | M0 | N0 | T3 | No  | Dead  | FEMALE | Not<br>Evaluated | 78 | 345  |

|                                      |       |      |    |           |    |    |     |     |       |        |                  |    |      |
|--------------------------------------|-------|------|----|-----------|----|----|-----|-----|-------|--------|------------------|----|------|
| TCGA-63-<br>A5MP-01A-<br>11R-A26W-07 | Tumor | LUSC | R0 | Stage IIB | M0 | N1 | T2  | Yes | Alive | MALE   | Not<br>Evaluated | 56 | 769  |
| TCGA-63-<br>A5MR-01A-<br>31R-A27Q-07 | Tumor | LUSC | R0 | Stage IB  | M0 | N0 | T2  | Yes | Alive | FEMALE | Not<br>Evaluated | 70 | 2716 |
| TCGA-63-<br>A5MS-01A-<br>11R-A26W-07 | Tumor | LUSC | R0 | Stage IB  | M0 | N0 | T2  | Yes | Alive | MALE   | Not<br>Evaluated | 78 | 2381 |
| TCGA-63-<br>A5MT-01A-<br>21R-A26W-07 | Tumor | LUSC | R0 | Stage IIB | M0 | N0 | T3  | Yes | Alive | MALE   | Not<br>Evaluated | 74 | 498  |
| TCGA-63-<br>A5MU-01A-<br>11R-A26W-07 | Tumor | LUSC | R0 | Stage IIB | M0 | N1 | T2b | Yes | Dead  | MALE   | Not<br>Evaluated | 48 |      |
| TCGA-63-<br>A5MV-01A-<br>21R-A26W-07 | Tumor | LUSC | R0 | Stage IIA | M0 | N0 | T2b | Yes | Alive | MALE   | Not<br>Evaluated | 69 | 1100 |
| TCGA-63-<br>A5MW-01A-<br>11R-A26W-07 | Tumor | LUSC | R0 | Stage IB  | M0 | N0 | T2  | Yes | Alive | MALE   | Not<br>Evaluated | 76 | 1639 |



|                                      |       |      |    |           |    |    |     |     |       |        |                  |    |      |
|--------------------------------------|-------|------|----|-----------|----|----|-----|-----|-------|--------|------------------|----|------|
| TCGA-63-<br>A5MY-01A-<br>11R-A26W-07 | Tumor | LUSC | R0 | Stage IA  | M0 | N0 | T1b | Yes | Alive | MALE   | Not<br>Evaluated | 63 | 1052 |
| TCGA-66-<br>2727-01A-01R-<br>0980-07 | Tumor | LUSC | R0 | Stage IB  | M0 | N0 | T2  | Yes | Dead  | FEMALE | Not Available    | 55 | 516  |
| TCGA-66-<br>2734-01A-01R-<br>0980-07 | Tumor | LUSC | R0 | Stage IB  | M0 | N0 | T2  | Yes | Alive | FEMALE | Not Available    | 62 | 1311 |
| TCGA-66-<br>2737-01A-01R-<br>0980-07 | Tumor | LUSC | R0 | Stage IIB | M0 | N1 | T2  | Yes | Alive | MALE   | Not Available    | 72 | 61   |
| TCGA-66-<br>2742-01A-01R-<br>0980-07 | Tumor | LUSC | R0 | Stage IV  | M1 | N1 | T2  | Yes | Alive | MALE   | Not Available    | 70 | 641  |
| TCGA-66-<br>2744-01A-01R-<br>0980-07 | Tumor | LUSC | R0 | Stage IIB | M0 | N1 | T2  | Yes | Alive | MALE   | Not Available    | 71 | 30   |
| TCGA-66-<br>2753-01A-01R-<br>0980-07 | Tumor | LUSC | R0 | Stage IB  | M0 | N0 | T2  | Yes | Alive | MALE   | Not Available    | 69 | 31   |

|                              |       |      |    |            |    |    |    |     |       |        |               |    |      |
|------------------------------|-------|------|----|------------|----|----|----|-----|-------|--------|---------------|----|------|
| TCGA-66-2754-01A-01R-0980-07 | Tumor | LUSC | R0 | Stage IIIA | M0 | N2 | T2 | Yes | Alive | MALE   | Not Available | 67 | 61   |
| TCGA-66-2755-01A-01R-0851-07 | Tumor | LUSC | R0 | Stage IB   | M0 | N0 | T2 | Yes | Alive | MALE   | Not Available | 63 | 28   |
| TCGA-66-2756-01A-01R-0851-07 | Tumor | LUSC | R0 | Stage IIIB | M0 | N0 | T4 | Yes | Alive | MALE   | Not Available | 68 | 30   |
| TCGA-66-2757-01A-01R-0851-07 | Tumor | LUSC | R0 | Stage IA   | M0 | N0 | T1 | Yes | Alive | FEMALE | Not Available | 65 | 1338 |
| TCGA-66-2758-01A-02R-0851-07 | Tumor | LUSC | R0 | Stage IB   | M0 | N0 | T2 | Yes | Alive | MALE   | Not Available | 71 | 639  |
| TCGA-66-2759-01A-01R-0851-07 | Tumor | LUSC | R0 | Stage IIIA | M0 | N2 | T2 | Yes | Alive | MALE   | Not Available | 66 | 762  |
| TCGA-66-2763-01A-01R-0851-07 | Tumor | LUSC | R0 | Stage IB   | M0 | N0 | T2 | Yes | Alive | FEMALE | Not Available | 63 | 30   |

|                              |       |      |    |            |    |    |    |     |       |      |               |    |     |
|------------------------------|-------|------|----|------------|----|----|----|-----|-------|------|---------------|----|-----|
| TCGA-66-2765-01A-01R-0851-07 | Tumor | LUSC | R0 | Stage IB   | M0 | N0 | T2 | Yes | Alive | MALE | Not Available | 64 | 61  |
| TCGA-66-2766-01A-01R-0851-07 | Tumor | LUSC | R0 | Stage IIIA | M0 | N2 | T2 | Yes | Alive | MALE | Not Available | 54 | 31  |
| TCGA-66-2767-01A-01R-0851-07 | Tumor | LUSC | R0 | Stage IIIB | M0 | N3 | T2 | Yes | Alive | MALE | Not Available | 62 | 61  |
| TCGA-66-2768-01A-01R-0851-07 | Tumor | LUSC | R0 | Stage IIB  | M0 | N1 | T2 | Yes | Alive | MALE | Not Available | 57 | 61  |
| TCGA-66-2769-01A-02R-0851-07 | Tumor | LUSC | R1 | Stage IIIB | M0 | N0 | T4 | Yes | Dead  | MALE | Not Available | 75 | 215 |
| TCGA-66-2770-01A-01R-0851-07 | Tumor | LUSC | R0 | Stage IB   | M0 | N0 | T2 | Yes | Alive | MALE | Not Available | 79 | 700 |
| TCGA-66-2771-01A-01R-0980-07 | Tumor | LUSC | R0 | Stage IIB  | M0 | N1 | T2 | Yes | Alive | MALE | Not Available | 60 | 578 |

|                              |       |      |    |            |    |    |    |     |       |        |               |    |     |
|------------------------------|-------|------|----|------------|----|----|----|-----|-------|--------|---------------|----|-----|
| TCGA-66-2773-01A-01R-1201-07 | Tumor | LUSC | R0 | Stage IB   | M0 | N0 | T2 | Yes | Dead  | MALE   | Not Available | 69 | 92  |
| TCGA-66-2777-01A-01R-1201-07 | Tumor | LUSC | R0 | Stage IB   | M0 | N0 | T2 | Yes | Alive | MALE   | Not Available | 71 | 61  |
| TCGA-66-2778-01A-02R-0851-07 | Tumor | LUSC | R2 | Stage IIIB | M0 | N3 | T2 | Yes | Alive | FEMALE | Not Available | 68 | 578 |
| TCGA-66-2780-01A-01R-0851-07 | Tumor | LUSC | R0 | Stage IB   | M0 | N0 | T2 | Yes | Dead  | MALE   | Not Available | 65 | 366 |
| TCGA-66-2781-01A-01R-0851-07 | Tumor | LUSC | R0 | Stage IB   | M0 | N0 | T2 | Yes | Alive | MALE   | Not Available | 67 | 121 |
| TCGA-66-2782-01A-01R-0851-07 | Tumor | LUSC | R0 | Stage IIB  | M0 | N0 | T3 | Yes | Dead  | MALE   | Not Available | 71 | 365 |
| TCGA-66-2783-01A-01R-1201-07 | Tumor | LUSC | R2 | Stage IIIB | M0 | N3 | T2 | Yes | Alive | MALE   | Not Available | 67 | 759 |

|                              |       |      |    |            |    |    |    |     |       |        |               |    |      |
|------------------------------|-------|------|----|------------|----|----|----|-----|-------|--------|---------------|----|------|
| TCGA-66-2785-01A-01R-0851-07 | Tumor | LUSC | R0 | Stage IB   | M0 | N0 | T2 | Yes | Alive | MALE   | Not Available | 65 | 60   |
| TCGA-66-2786-01A-01R-0851-07 | Tumor | LUSC | R0 | Stage IA   | M0 | N0 | T1 | Yes | Alive | FEMALE | Not Available | 68 | 790  |
| TCGA-66-2787-01A-01R-0980-07 | Tumor | LUSC | R0 | Stage IA   | M0 | N0 | T1 | Yes | Alive | MALE   | Not Available | 57 | 1217 |
| TCGA-66-2788-01A-01R-0980-07 | Tumor | LUSC | R0 | Stage IB   | M0 | N0 | T2 | Yes | Alive | MALE   | Not Available | 56 | 699  |
| TCGA-66-2789-01A-01R-0980-07 | Tumor | LUSC | R0 | Stage IIIB | M0 | N3 | T1 | Yes | Dead  | MALE   | Not Available | 73 | 123  |
| TCGA-66-2790-01A-01R-0980-07 | Tumor | LUSC | R0 | Stage IIB  | M0 | N1 | T2 | Yes | Alive | MALE   | Not Available | 72 | 699  |
| TCGA-66-2791-01A-01R-0980-07 | Tumor | LUSC | R1 | Stage IIIB | M0 | N3 | T2 | Yes | Dead  | MALE   | Not Available | 66 | 153  |

|                              |       |      |               |            |    |    |     |     |       |        |               |    |      |
|------------------------------|-------|------|---------------|------------|----|----|-----|-----|-------|--------|---------------|----|------|
| TCGA-66-2792-01A-01R-0980-07 | Tumor | LUSC | R0            | Stage IIB  | M0 | N1 | T2  | Yes | Alive | MALE   | Not Available | 58 | 913  |
| TCGA-66-2793-01A-01R-1201-07 | Tumor | LUSC | R0            | Stage IIIB | M0 | N1 | T4  | Yes | Dead  | MALE   | Not Available | 68 | 306  |
| TCGA-66-2794-01A-01R-1201-07 | Tumor | LUSC | R0            | Stage IIIB | M0 | N2 | T4  | Yes | Alive | MALE   | Not Available | 64 | 1645 |
| TCGA-66-2795-01A-02R-0980-07 | Tumor | LUSC | R0            | Stage IIIB | M0 | N1 | T4  | Yes | Alive | MALE   | Not Available | 68 | 122  |
| TCGA-66-2800-01A-01R-1201-07 | Tumor | LUSC | R0            | Stage IIIB | M0 | N0 | T4  | Yes | Alive | MALE   | Not Available | 70 | 1492 |
| TCGA-68-7755-01A-11R-2125-07 | Tumor | LUSC | Not Available | Stage IIA  | M0 | N1 | T1b | Yes | Alive | FEMALE | WHITE         | 60 | 83   |
| TCGA-68-7756-01A-11R-2125-07 | Tumor | LUSC | Not Available | Stage IIIA | MX | N1 | T4  | Yes | Alive | MALE   | WHITE         | 84 | 202  |

|                              |       |      |               |            |    |    |     |     |       |        |                           |    |     |
|------------------------------|-------|------|---------------|------------|----|----|-----|-----|-------|--------|---------------------------|----|-----|
| TCGA-68-7757-01B-11R-2296-07 | Tumor | LUSC | Not Available | Stage IA   | MX | N0 | T1b | Yes | Alive | MALE   | WHITE                     | 74 | 211 |
| TCGA-68-8250-01A-11R-2296-07 | Tumor | LUSC | Not Available | Stage IA   | MX | N0 | T1a | Yes | Alive | MALE   | BLACK OR AFRICAN AMERICAN | 66 | 244 |
| TCGA-68-8251-01A-11R-2296-07 | Tumor | LUSC | Not Available | Stage IB   | M0 | N0 | T2a | Yes | Alive | MALE   | WHITE                     | 78 | 406 |
| TCGA-68-A59I-01A-11R-A262-07 | Tumor | LUSC | Not Evaluated | Stage IIIA | M0 | N1 | T3  | Yes | Alive | FEMALE | BLACK OR AFRICAN AMERICAN | 73 | 492 |
| TCGA-68-A59J-01A-21R-A26W-07 | Tumor | LUSC | R0            | Stage IB   | MX | N0 | T2a | Yes | Alive | FEMALE | WHITE                     | 74 | 448 |

|                                      |       |      |    |            |    |    |    |     |       |        |                                    |    |      |
|--------------------------------------|-------|------|----|------------|----|----|----|-----|-------|--------|------------------------------------|----|------|
| TCGA-6A-<br>AB49-01A-<br>12R-A405-07 | Tumor | LUSC | RX | Stage IB   | MX | N0 | T2 | Yes | Dead  | FEMALE | BLACK<br>OR<br>AFRICAN<br>AMERICAN | 73 |      |
| TCGA-70-<br>6722-01A-11R-<br>1820-07 | Tumor | LUSC | RX | Stage IIIA | M0 | N1 | T3 | No  | Alive | MALE   | ASIAN                              | 47 | 367  |
| TCGA-70-<br>6723-01A-11R-<br>1820-07 | Tumor | LUSC | RX | Stage IIA  | M0 | N0 | T3 | No  | Alive | MALE   | ASIAN                              | 65 | 375  |
| TCGA-77-<br>6842-01A-11R-<br>1949-07 | Tumor | LUSC | R0 | Stage IIB  | M0 | N1 | T2 | Yes | Dead  | MALE   | WHITE                              | 79 | 899  |
| TCGA-77-<br>6843-01A-11R-<br>1949-07 | Tumor | LUSC | R0 | Stage IIA  | M0 | N1 | T1 | Yes | Dead  | MALE   | WHITE                              | 74 | 2224 |
| TCGA-77-<br>6844-01A-11R-<br>1949-07 | Tumor | LUSC | R0 | Stage IIIA | M0 | N1 | T3 | Yes | Dead  | MALE   | WHITE                              | 74 | 2284 |



|                              |        |      |    |           |    |    |    |     |       |        |               |    |      |
|------------------------------|--------|------|----|-----------|----|----|----|-----|-------|--------|---------------|----|------|
| TCGA-77-6845-01A-11R-1949-07 | Tumor  | LUSC | R0 | Stage IIB | M0 | N0 | T3 | Yes | Dead  | MALE   | WHITE         | 69 | 708  |
| TCGA-77-7138-01A-41R-2045-07 | Tumor  | LUSC | R0 | Stage IB  | M0 | N0 | T2 | Yes | Dead  | MALE   | Not Available | 67 | 340  |
| TCGA-77-7138-11A-01R-2045-07 | Normal | LUSC | R0 | Stage IB  | M0 | N0 | T2 | Yes | Dead  | MALE   | Not Available | 67 | 340  |
| TCGA-77-7139-01A-11R-2045-07 | Tumor  | LUSC | R0 | Stage IIB | M0 | N1 | T2 | Yes | Alive | MALE   | WHITE         | 56 | 4261 |
| TCGA-77-7140-01A-41R-2045-07 | Tumor  | LUSC | R0 | Stage IIB | M0 | N1 | T2 | No  | Dead  | FEMALE | WHITE         | 69 | 632  |
| TCGA-77-7141-01A-11R-2045-07 | Tumor  | LUSC | R0 | Stage IB  | M0 | N0 | T2 | Yes | Alive | MALE   | WHITE         | 64 | 15   |
| TCGA-77-7142-01A-11R-2045-07 | Tumor  | LUSC | R0 | Stage IB  | M0 | N0 | T2 | Yes | Alive | FEMALE | WHITE         | 59 | 2227 |

|                              |        |      |    |            |    |    |    |     |       |        |       |    |      |
|------------------------------|--------|------|----|------------|----|----|----|-----|-------|--------|-------|----|------|
| TCGA-77-7142-11A-01R-2045-07 | Normal | LUSC | R0 | Stage IB   | M0 | N0 | T2 | Yes | Alive | FEMALE | WHITE | 59 | 2227 |
| TCGA-77-7335-01A-11R-2045-07 | Tumor  | LUSC | R0 | Stage IIIB | M0 | N2 | T4 | Yes | Dead  | FEMALE | WHITE | 62 | 2133 |
| TCGA-77-7335-11A-01R-2045-07 | Normal | LUSC | R0 | Stage IIIB | M0 | N2 | T4 | Yes | Dead  | FEMALE | WHITE | 62 | 2133 |
| TCGA-77-7337-01A-21R-2045-07 | Tumor  | LUSC | R0 | Stage IIB  | M0 | N1 | T2 | Yes | Dead  | MALE   | WHITE | 65 | 3253 |
| TCGA-77-7337-11A-01R-2045-07 | Normal | LUSC | R0 | Stage IIB  | M0 | N1 | T2 | Yes | Dead  | MALE   | WHITE | 65 | 3253 |
| TCGA-77-7338-01A-11R-2045-07 | Tumor  | LUSC | R1 | Stage IB   | M0 | N0 | T2 | Yes | Dead  | MALE   | WHITE | 64 | 5    |
| TCGA-77-7338-11A-01R-2045-07 | Normal | LUSC | R1 | Stage IB   | M0 | N0 | T2 | Yes | Dead  | MALE   | WHITE | 64 | 5    |

|                              |        |      |    |           |    |    |     |     |       |      |               |    |      |
|------------------------------|--------|------|----|-----------|----|----|-----|-----|-------|------|---------------|----|------|
| TCGA-77-7463-01A-11R-2045-07 | Tumor  | LUSC | R0 | Stage IB  | M0 | N0 | T2  | Yes | Dead  | MALE | WHITE         | 75 | 1423 |
| TCGA-77-7465-01A-11R-2045-07 | Tumor  | LUSC | R0 | Stage IIA | M0 | N1 | T2a | Yes | Alive | MALE | WHITE         | 58 | 990  |
| TCGA-77-8007-01A-11R-2187-07 | Tumor  | LUSC | R0 | Stage IIB | M0 | N1 | T2  | Yes | Dead  | MALE | Not Available | 68 | 198  |
| TCGA-77-8007-11A-01R-2187-07 | Normal | LUSC | R0 | Stage IIB | M0 | N1 | T2  | Yes | Dead  | MALE | Not Available | 68 | 198  |
| TCGA-77-8008-01A-21R-2187-07 | Tumor  | LUSC | R0 | Stage IB  | M0 | N0 | T2  | Yes | Dead  | MALE | Not Available | 68 | 2639 |
| TCGA-77-8008-11A-01R-2187-07 | Normal | LUSC | R0 | Stage IB  | M0 | N0 | T2  | Yes | Dead  | MALE | Not Available | 68 | 2639 |
| TCGA-77-8009-01A-11R-2187-07 | Tumor  | LUSC | R0 | Stage IIB | M0 | N1 | T2  | Yes | Alive | MALE | Not Available | 68 | 1695 |

|                              |       |      |    |            |    |    |    |     |       |        |               |    |      |
|------------------------------|-------|------|----|------------|----|----|----|-----|-------|--------|---------------|----|------|
| TCGA-77-8128-01A-11R-2247-07 | Tumor | LUSC | R0 | Stage IIIA | M0 | N2 | T2 | Yes | Dead  | MALE   | Not Evaluated | 60 | 1150 |
| TCGA-77-8130-01A-11R-2247-07 | Tumor | LUSC | R0 | Stage IIB  | M0 | N1 | T2 | Yes | Alive | MALE   | Not Evaluated | 69 | 4765 |
| TCGA-77-8131-01A-11R-2247-07 | Tumor | LUSC | R0 | Stage IB   | M0 | NX | T2 | Yes | Dead  | MALE   | Not Evaluated | 72 | 383  |
| TCGA-77-8133-01A-12R-2247-07 | Tumor | LUSC | R0 | Stage IIA  | M0 | N1 | T1 | Yes | Dead  | MALE   | Not Evaluated | 74 | 1640 |
| TCGA-77-8136-01A-11R-2247-07 | Tumor | LUSC | R0 | Stage IIB  | M0 | N1 | T2 | Yes | Dead  | FEMALE | Not Evaluated | 74 | 1189 |
| TCGA-77-8138-01A-11R-2247-07 | Tumor | LUSC | R0 | Stage IB   | M0 | N0 | T2 | Yes | Dead  | MALE   | Not Evaluated | 74 | 539  |
| TCGA-77-8139-01A-11R-2247-07 | Tumor | LUSC | R0 | Stage IIB  | M0 | N0 | T3 | Yes | Alive | MALE   | Not Evaluated | 72 | 3166 |

|                              |       |      |    |            |    |    |    |     |       |        |               |    |      |
|------------------------------|-------|------|----|------------|----|----|----|-----|-------|--------|---------------|----|------|
| TCGA-77-8140-01A-11R-2247-07 | Tumor | LUSC | R0 | Stage IIB  | M0 | N1 | T2 | Yes | Dead  | FEMALE | Not Evaluated | 66 | 351  |
| TCGA-77-8143-01A-11R-2247-07 | Tumor | LUSC | R0 | Stage IIIA | M0 | N2 | T2 | Yes | Dead  | MALE   | Not Evaluated | 76 | 803  |
| TCGA-77-8144-01A-11R-2247-07 | Tumor | LUSC | R0 | Stage IB   | M0 | N0 | T2 | Yes | Alive | MALE   | Not Evaluated | 70 | 833  |
| TCGA-77-8145-01A-11R-2247-07 | Tumor | LUSC | R1 | Stage IIIB | M0 | N1 | T4 | Yes | Dead  | MALE   | Not Evaluated | 73 | 212  |
| TCGA-77-8146-01A-11R-2247-07 | Tumor | LUSC | R0 | Stage IA   | M0 | N0 | T1 | Yes | Alive | MALE   | Not Evaluated | 72 | 3189 |
| TCGA-77-8148-01A-11R-2247-07 | Tumor | LUSC | R0 | Stage IIIA | M0 | N1 | T3 | Yes | Alive | MALE   | Not Evaluated | 68 | 2023 |
| TCGA-77-8150-01A-11R-2247-07 | Tumor | LUSC | R0 | Stage IIIA | M0 | N1 | T3 | Yes | Dead  | MALE   | Not Evaluated | 64 | 1655 |

|                              |       |      |    |            |    |    |     |     |       |        |               |    |      |
|------------------------------|-------|------|----|------------|----|----|-----|-----|-------|--------|---------------|----|------|
| TCGA-77-8153-01A-11R-2403-07 | Tumor | LUSC | R0 | Stage IB   | M0 | N0 | T2  | Yes | Alive | FEMALE | Not Evaluated | 77 | 1992 |
| TCGA-77-8154-01A-11R-2247-07 | Tumor | LUSC | R0 | Stage IA   | M0 | N0 | T1  | Yes | Alive | MALE   | Not Evaluated | 67 | 1841 |
| TCGA-77-8156-01A-11R-2247-07 | Tumor | LUSC | R0 | Stage IB   | M0 | N0 | T2a | Yes | Alive | MALE   | Not Evaluated | 60 | 1106 |
| TCGA-77-A5FZ-01A-31R-A27Q-07 | Tumor | LUSC | R0 | Stage IIIB | M0 | N0 | T4  | Yes | Dead  | MALE   | Not Evaluated | 64 | 3838 |
| TCGA-77-A5G1-01A-11R-A27Q-07 | Tumor | LUSC | R0 | Stage IIIA | M0 | N1 | T3  | Yes | Alive | MALE   | Not Evaluated | 75 | 4026 |
| TCGA-77-A5G3-01A-31R-A27Q-07 | Tumor | LUSC | R0 | Stage IIB  | M0 | N1 | T2  | Yes | Alive | MALE   | Not Evaluated | 63 | 4570 |
| TCGA-77-A5G6-01A-11R-A27Q-07 | Tumor | LUSC | R0 | Stage IIIA | M0 | N2 | T2  | Yes | Dead  | MALE   | Not Evaluated | 66 | 678  |

|                                      |       |      |    |            |    |    |     |     |       |      |                  |               |      |
|--------------------------------------|-------|------|----|------------|----|----|-----|-----|-------|------|------------------|---------------|------|
| TCGA-77-<br>A5G7-01B-<br>11R-A27Q-07 | Tumor | LUSC | R0 | Stage IA   | M0 | N0 | T1  | Yes | Dead  | MALE | Not<br>Evaluated | 63            | 180  |
| TCGA-77-<br>A5G8-01B-<br>11R-A27Q-07 | Tumor | LUSC | R0 | Stage IIB  | M0 | N0 | T3  | Yes | Alive | MALE | Not<br>Evaluated | 70            | 1884 |
| TCGA-77-<br>A5GA-01A-<br>11R-A27Q-07 | Tumor | LUSC | R0 | Stage IB   | M0 | N0 | T2a | Yes | Alive | MALE | Not<br>Evaluated | 76            | 1280 |
| TCGA-77-<br>A5GB-01B-<br>11R-A27Q-07 | Tumor | LUSC | R0 | Stage IB   | M0 | NX | T2a | Yes | Dead  | MALE | Not<br>Evaluated | 90            | 937  |
| TCGA-77-<br>A5GF-01A-<br>21R-A27Q-07 | Tumor | LUSC | R0 | Stage IIA  | M0 | N1 | T2a | Yes | Alive | MALE | Not<br>Evaluated | 70            | 840  |
| TCGA-77-<br>A5GH-01A-<br>11R-A27Q-07 | Tumor | LUSC | R0 | Stage IB   | M0 | N0 | T2a | Yes | Alive | MALE | Not<br>Evaluated | 81            | 1182 |
| TCGA-79-<br>5596-01A-31R-<br>1949-07 | Tumor | LUSC | R0 | Stage IIIA | M0 | N1 | T3  | Yes | Alive | MALE | Not Available    | Not Available |      |

|                              |       |      |    |            |    |    |     |     |       |        |       |    |      |
|------------------------------|-------|------|----|------------|----|----|-----|-----|-------|--------|-------|----|------|
| TCGA-85-6175-01A-11R-1820-07 | Tumor | LUSC | R0 | Stage IIB  | M0 | N0 | T3  | No  | Alive | FEMALE | WHITE | 63 | 294  |
| TCGA-85-6560-01A-11R-1820-07 | Tumor | LUSC | R0 | Stage IIA  | M0 | N1 | T1b | Yes | Alive | MALE   | WHITE | 59 | 1259 |
| TCGA-85-6561-01A-11R-1820-07 | Tumor | LUSC | R0 | Stage IB   | M0 | NX | T2a | Yes | Alive | MALE   | WHITE | 66 | 1224 |
| TCGA-85-6798-01A-11R-1949-07 | Tumor | LUSC | R0 | Stage IIIA | M0 | N1 | T3  | Yes | Alive | MALE   | WHITE | 57 | 195  |
| TCGA-85-7696-01A-11R-2125-07 | Tumor | LUSC | R0 | Stage IA   | M0 | N0 | T1  | Yes | Alive | MALE   | WHITE | 64 | 1111 |
| TCGA-85-7697-01A-11R-2125-07 | Tumor | LUSC | R0 | Stage IIB  | M0 | N0 | T3  | Yes | Alive | MALE   | WHITE | 49 | 1063 |
| TCGA-85-7698-01A-11R-2125-07 | Tumor | LUSC | R0 | Stage IA   | M0 | N0 | T1b | Yes | Alive | MALE   | WHITE | 48 | 952  |



|                              |        |      |               |            |    |    |     |     |       |        |       |    |      |
|------------------------------|--------|------|---------------|------------|----|----|-----|-----|-------|--------|-------|----|------|
| TCGA-85-7699-01A-11R-2125-07 | Tumor  | LUSC | R0            | Stage IIIA | M0 | N0 | T4  | Yes | Alive | MALE   | WHITE | 73 | 1001 |
| TCGA-85-7710-01A-11R-2125-07 | Tumor  | LUSC | Not Available | Stage IA   | M0 | N0 | T1b | Yes | Alive | FEMALE | WHITE | 59 | 42   |
| TCGA-85-7710-11A-01R-2125-07 | Normal | LUSC | Not Available | Stage IA   | M0 | N0 | T1b | Yes | Alive | FEMALE | WHITE | 59 | 42   |
| TCGA-85-7843-01A-11R-2125-07 | Tumor  | LUSC | R0            | Stage IIA  | M0 | N1 | T2a | Yes | Alive | MALE   | WHITE | 50 | 35   |
| TCGA-85-7844-01A-11R-2125-07 | Tumor  | LUSC | R0            | Stage IB   | M0 | N0 | T2a | Yes | Alive | MALE   | WHITE | 71 | 911  |
| TCGA-85-7950-01A-11R-2187-07 | Tumor  | LUSC | RX            | Stage IB   | M0 | N0 | T2a | Yes | Alive | MALE   | WHITE | 46 | 576  |
| TCGA-85-8048-01A-11R-2247-07 | Tumor  | LUSC | R0            | Stage IA   | M0 | N0 | T1  | Yes | Alive | MALE   | WHITE | 62 | 765  |

|                              |       |      |    |            |    |    |     |     |       |      |       |    |      |
|------------------------------|-------|------|----|------------|----|----|-----|-----|-------|------|-------|----|------|
| TCGA-85-8049-01A-11R-2247-07 | Tumor | LUSC | R0 | Stage IB   | M0 | N0 | T2a | No  | Alive | MALE | WHITE | 57 | 579  |
| TCGA-85-8052-01A-11R-2247-07 | Tumor | LUSC | R0 | Stage IIB  | M0 | N0 | T3  | Yes | Alive | MALE | WHITE | 53 | 734  |
| TCGA-85-8070-01A-11R-2247-07 | Tumor | LUSC | R0 | Stage IB   | M0 | N0 | T2  | Yes | Alive | MALE | WHITE | 71 | 960  |
| TCGA-85-8071-01A-11R-2247-07 | Tumor | LUSC | R0 | Stage IIA  | M0 | N1 | T1a | Yes | Alive | MALE | WHITE | 52 | 815  |
| TCGA-85-8072-01A-31R-2247-07 | Tumor | LUSC | R0 | Stage IA   | M0 | N0 | T1a | Yes | Alive | MALE | WHITE | 60 | 932  |
| TCGA-85-8276-01A-11R-2296-07 | Tumor | LUSC | R0 | Stage IIA  | M0 | N1 | T1b | Yes | Alive | MALE | WHITE | 62 | 1050 |
| TCGA-85-8277-01A-11R-2296-07 | Tumor | LUSC | R0 | Stage IIIA | M0 | N1 | T3  | No  | Alive | MALE | WHITE | 70 | 307  |

|                              |       |      |    |            |    |    |     |     |       |      |       |    |     |
|------------------------------|-------|------|----|------------|----|----|-----|-----|-------|------|-------|----|-----|
| TCGA-85-8287-01A-11R-2296-07 | Tumor | LUSC | R0 | Stage IA   | M0 | N0 | T1b | Yes | Alive | MALE | WHITE | 72 | 23  |
| TCGA-85-8288-01A-11R-2296-07 | Tumor | LUSC | R0 | Stage IIA  | M0 | N1 | T1b | Yes | Alive | MALE | WHITE | 70 | 402 |
| TCGA-85-8350-01A-11R-2296-07 | Tumor | LUSC | R0 | Stage IA   | M0 | N0 | T1b | Yes | Alive | MALE | WHITE | 61 | 683 |
| TCGA-85-8351-01A-11R-2296-07 | Tumor | LUSC | R0 | Stage IIA  | M0 | N1 | T2a | Yes | Alive | MALE | WHITE | 72 | 510 |
| TCGA-85-8352-01A-31R-2326-07 | Tumor | LUSC | R0 | Stage IIIA | M0 | N1 | T3  | Yes | Alive | MALE | WHITE | 67 | 161 |
| TCGA-85-8353-01A-21R-2296-07 | Tumor | LUSC | R0 | Stage IIIA | M0 | N1 | T3  | Yes | Alive | MALE | WHITE | 72 | 94  |
| TCGA-85-8354-01A-31R-2326-07 | Tumor | LUSC | R0 | Stage IB   | M0 | N0 | T2a | Yes | Alive | MALE | WHITE | 53 | 995 |

|                              |       |      |    |           |    |    |     |     |       |        |       |    |      |
|------------------------------|-------|------|----|-----------|----|----|-----|-----|-------|--------|-------|----|------|
| TCGA-85-8355-01A-11R-2296-07 | Tumor | LUSC | R0 | Stage IA  | M0 | N0 | T1a | No  | Alive | MALE   | WHITE | 63 | 61   |
| TCGA-85-8479-01A-11R-2326-07 | Tumor | LUSC | R0 | Stage IA  | M0 | N0 | T1a | Yes | Alive | MALE   | WHITE | 66 | 468  |
| TCGA-85-8481-01A-11R-2326-07 | Tumor | LUSC | R0 | Stage IIB | M0 | N0 | T3  | Yes | Alive | MALE   | WHITE | 70 | 236  |
| TCGA-85-8580-01A-31R-2403-07 | Tumor | LUSC | R0 | Stage IB  | M0 | N0 | T2a | Yes | Alive | FEMALE | WHITE | 52 | 1113 |
| TCGA-85-8582-01A-21R-2403-07 | Tumor | LUSC | R0 | Stage IA  | M0 | N0 | T1a | Yes | Alive | MALE   | WHITE | 49 | 1160 |
| TCGA-85-8584-01A-11R-2403-07 | Tumor | LUSC | R0 | Stage IIA | M0 | N1 | T2a | Yes | Alive | MALE   | WHITE | 71 | 383  |
| TCGA-85-8664-01A-11R-2403-07 | Tumor | LUSC | R0 | Stage IIB | M0 | N1 | T2b | Yes | Alive | MALE   | WHITE | 73 | 550  |

|                              |       |      |    |           |    |    |     |     |       |        |       |    |      |
|------------------------------|-------|------|----|-----------|----|----|-----|-----|-------|--------|-------|----|------|
| TCGA-85-8666-01A-11R-2403-07 | Tumor | LUSC | R0 | Stage IB  | M0 | N0 | T2a | Yes | Alive | MALE   | WHITE | 65 | 687  |
| TCGA-85-A4CL-01A-41R-A26W-07 | Tumor | LUSC | R0 | Stage IA  | M0 | N0 | T1b | Yes | Alive | MALE   | WHITE | 65 | 921  |
| TCGA-85-A4CN-01A-11R-A24H-07 | Tumor | LUSC | R0 | Stage IIB | M0 | N1 | T2b | Yes | Alive | FEMALE | WHITE | 56 | 1038 |
| TCGA-85-A4JB-01A-51R-A262-07 | Tumor | LUSC | R0 | Stage IIB | M0 | N0 | T3  | Yes | Alive | MALE   | WHITE | 74 | 942  |
| TCGA-85-A4JC-01A-11R-A24Z-07 | Tumor | LUSC | R0 | Stage IIA | M0 | N0 | T2b | Yes | Alive | MALE   | WHITE | 84 | 604  |
| TCGA-85-A4PA-01A-11R-A24Z-07 | Tumor | LUSC | R0 | Stage IB  | M0 | N0 | T2a | Yes | Alive | MALE   | WHITE | 61 | 741  |
| TCGA-85-A4QQ-01A-41R-A262-07 | Tumor | LUSC | R0 | Stage IB  | M0 | N0 | T2a | Yes | Alive | MALE   | WHITE | 68 | 927  |

|                              |       |      |    |           |    |    |     |     |       |        |       |    |     |
|------------------------------|-------|------|----|-----------|----|----|-----|-----|-------|--------|-------|----|-----|
| TCGA-85-A4QR-01A-11R-A24Z-07 | Tumor | LUSC | R0 | Stage IB  | M0 | N0 | T2a | Yes | Alive | MALE   | WHITE | 67 | 600 |
| TCGA-85-A50M-01A-21R-A262-07 | Tumor | LUSC | R0 | Stage IIA | M0 | N0 | T2b | Yes | Alive | MALE   | ASIAN | 47 | 826 |
| TCGA-85-A50Z-01A-21R-A262-07 | Tumor | LUSC | R0 | Stage IIA | M0 | N0 | T2b | Yes | Alive | MALE   | WHITE | 57 | 493 |
| TCGA-85-A510-01A-11R-A26W-07 | Tumor | LUSC | R0 | Stage IIB | M0 | N1 | T2b | Yes | Alive | FEMALE | WHITE | 74 | 482 |
| TCGA-85-A511-01A-21R-A262-07 | Tumor | LUSC | R0 | Stage IIB | M0 | N1 | T2b | Yes | Alive | MALE   | WHITE | 62 | 455 |
| TCGA-85-A512-01A-11R-A26W-07 | Tumor | LUSC | R0 | Stage IIA | M0 | N1 | T1b | Yes | Alive | MALE   | WHITE | 46 | 465 |
| TCGA-85-A513-01A-12R-A26W-07 | Tumor | LUSC | R0 | Stage IA  | M0 | NX | T1a | No  | Alive | FEMALE | ASIAN | 60 | 910 |

|                                      |        |      |    |           |    |    |     |     |       |        |       |    |     |
|--------------------------------------|--------|------|----|-----------|----|----|-----|-----|-------|--------|-------|----|-----|
| TCGA-85-<br>A53L-01A-21R-<br>A26W-07 | Tumor  | LUSC | R0 | Stage IIA | M0 | N0 | T2b | Yes | Alive | MALE   | ASIAN | 63 | 377 |
| TCGA-85-<br>A5B5-01A-<br>21R-A26W-07 | Tumor  | LUSC | R0 | Stage IA  | M0 | N0 | T1b | Yes | Alive | MALE   | WHITE | 58 | 111 |
| TCGA-90-<br>6837-01A-11R-<br>1949-07 | Tumor  | LUSC | R0 | Stage IIB | MX | N0 | T3  | Yes | Alive | MALE   | WHITE | 64 | 758 |
| TCGA-90-<br>6837-11A-01R-<br>1949-07 | Normal | LUSC | R0 | Stage IIB | MX | N0 | T3  | Yes | Alive | MALE   | WHITE | 64 | 758 |
| TCGA-90-<br>7766-01A-21R-<br>2125-07 | Tumor  | LUSC | R0 | Stage IA  | MX | N0 | T1b | Yes | Alive | FEMALE | WHITE | 66 | 289 |
| TCGA-90-<br>7767-01A-11R-<br>2125-07 | Tumor  | LUSC | R0 | Stage IIB | MX | N1 | T2b | Yes | Alive | MALE   | WHITE | 56 | 89  |
| TCGA-90-<br>7767-11A-01R-<br>2125-07 | Normal | LUSC | R0 | Stage IIB | MX | N1 | T2b | Yes | Alive | MALE   | WHITE | 56 | 89  |

|                              |        |      |               |           |    |    |     |     |       |        |       |    |     |
|------------------------------|--------|------|---------------|-----------|----|----|-----|-----|-------|--------|-------|----|-----|
| TCGA-90-7769-01A-11R-2125-07 | Tumor  | LUSC | R0            | Stage IIB | MX | N1 | T2b | Yes | Alive | MALE   | WHITE | 55 | 358 |
| TCGA-90-7964-01A-21R-2187-07 | Tumor  | LUSC | R0            | Stage IB  | MX | N0 | T2a | Yes | Alive | MALE   | WHITE | 70 | 428 |
| TCGA-90-A4ED-01A-31R-A24Z-07 | Tumor  | LUSC | Not Evaluated | Stage IB  | MX | N0 | T2a | Yes | Alive | MALE   | WHITE | 69 | 615 |
| TCGA-90-A4EE-01A-11R-A24Z-07 | Tumor  | LUSC | Not Evaluated | Stage IIA | MX | N1 | T2a | Yes | Alive | MALE   | WHITE | 53 | 688 |
| TCGA-90-A59Q-01A-11R-A26W-07 | Tumor  | LUSC | R0            | Stage IIA | MX | N1 | T2a | Yes | Alive | FEMALE | WHITE | 61 | 322 |
| TCGA-92-7340-01A-21R-2045-07 | Tumor  | LUSC | R1            | Stage IIA | MX | N1 | T2a | Yes | Alive | FEMALE | WHITE | 45 | 82  |
| TCGA-92-7340-11A-01R-2045-07 | Normal | LUSC | R1            | Stage IIA | MX | N1 | T2a | Yes | Alive | FEMALE | WHITE | 45 | 82  |



|                              |       |      |               |             |    |    |     |     |       |        |                           |    |     |
|------------------------------|-------|------|---------------|-------------|----|----|-----|-----|-------|--------|---------------------------|----|-----|
| TCGA-92-7341-01A-31R-2045-07 | Tumor | LUSC | R0            | Stage IB    | MX | N0 | T2a | Yes | Alive | MALE   | WHITE                     | 71 | 106 |
| TCGA-92-8063-01A-11R-2247-07 | Tumor | LUSC | RX            | Stage IIIA  | MX | N2 | T2b | Yes | Alive | MALE   | WHITE                     | 52 | 122 |
| TCGA-92-8064-01A-11R-2247-07 | Tumor | LUSC | RX            | Discrepancy | MX | N0 | T2b | Yes | Alive | MALE   | WHITE                     | 58 | 160 |
| TCGA-92-8065-01A-11R-2247-07 | Tumor | LUSC | RX            | Stage IIB   | MX | N0 | T3  | Yes | Alive | FEMALE | WHITE                     | 74 | 70  |
| TCGA-94-7033-01A-11R-1949-07 | Tumor | LUSC | R0            | Stage IB    | MX | N0 | T2  | Yes | Alive | MALE   | WHITE                     | 73 | 640 |
| TCGA-94-7557-01A-11R-2125-07 | Tumor | LUSC | Not Available | Stage IB    | M0 | N0 | T2  | Yes | Dead  | MALE   | BLACK OR AFRICAN AMERICAN | 73 | 5   |

|                              |       |      |               |           |    |    |     |     |       |        |       |    |     |
|------------------------------|-------|------|---------------|-----------|----|----|-----|-----|-------|--------|-------|----|-----|
| TCGA-94-7943-01A-11R-2187-07 | Tumor | LUSC | R0            | Stage IA  | MX | NX | T1b | Yes | Alive | MALE   | WHITE | 80 | 559 |
| TCGA-94-8035-01A-11R-2247-07 | Tumor | LUSC | R0            | Stage IIB | MX | N0 | T3  | Yes | Alive | MALE   | WHITE | 64 | 122 |
| TCGA-94-8490-01A-11R-2326-07 | Tumor | LUSC | R0            | Stage IIB | M0 | N0 | T3  | Yes | Alive | MALE   | WHITE | 70 | 153 |
| TCGA-94-8491-01A-11R-2326-07 | Tumor | LUSC | Not Available | Stage IIA | M0 | N1 | T2a | Yes | Alive | MALE   | WHITE | 73 | 810 |
| TCGA-94-A4VJ-01A-11R-A24Z-07 | Tumor | LUSC | Not Available | Stage IA  | M0 | N0 | T1b | Yes | Alive | FEMALE | WHITE | 71 | 430 |
| TCGA-94-A5I4-01A-11R-A26W-07 | Tumor | LUSC | RX            | Stage IIA | MX | N1 | T2a | Yes | Alive | MALE   | WHITE | 61 | 491 |
| TCGA-94-A5I6-01A-21R-A27Q-07 | Tumor | LUSC | RX            | Stage IIB | M0 | N0 | T3  | Yes | Alive | MALE   | WHITE | 62 | 538 |

|                              |       |      |               |           |    |    |     |     |       |        |       |    |      |
|------------------------------|-------|------|---------------|-----------|----|----|-----|-----|-------|--------|-------|----|------|
| TCGA-96-7544-01A-11R-2045-07 | Tumor | LUSC | Not Available | Stage IIB | MX | N1 | T2  | Yes | Alive | MALE   | WHITE | 83 | 2160 |
| TCGA-96-7545-01A-21R-2045-07 | Tumor | LUSC | Not Available | Stage IA  | MX | N0 | T1  | Yes | Alive | MALE   | WHITE | 73 | 1736 |
| TCGA-96-8169-01A-11R-2296-07 | Tumor | LUSC | Not Available | Stage IA  | M0 | N0 | T1a | Yes | Alive | FEMALE | WHITE | 67 | 557  |
| TCGA-96-8170-01A-11R-2296-07 | Tumor | LUSC | Not Available | Stage IIA | M0 | N1 | T1a | Yes | Alive | FEMALE | WHITE | 75 | 531  |
| TCGA-96-A4JK-01A-11R-A24Z-07 | Tumor | LUSC | R0            | Stage IIA | M0 | N1 | T2a | Yes | Alive | MALE   | WHITE | 65 | 589  |
| TCGA-96-A4JL-01A-11R-A24Z-07 | Tumor | LUSC | R0            | Stage IIA | M0 | N1 | T2a | No  | Alive | FEMALE | ASIAN | 78 | 842  |
| TCGA-98-7454-01A-11R-2045-07 | Tumor | LUSC | R0            | Stage IB  | M0 | N0 | T2a | Yes | Alive | MALE   | WHITE | 73 | 652  |

|                              |       |      |    |            |    |    |     |     |       |        |                           |    |     |
|------------------------------|-------|------|----|------------|----|----|-----|-----|-------|--------|---------------------------|----|-----|
| TCGA-98-8020-01A-11R-2247-07 | Tumor | LUSC | R0 | Stage IIIA | M0 | N2 | T2  | No  | Dead  | FEMALE | BLACK OR AFRICAN AMERICAN | 56 | 84  |
| TCGA-98-8021-01A-11R-2247-07 | Tumor | LUSC | R0 | Stage IA   | M0 | N0 | T1a | Yes | Alive | FEMALE | WHITE                     | 75 | 937 |
| TCGA-98-8022-01A-11R-2247-07 | Tumor | LUSC | R0 | Stage IA   | M0 | N0 | T1a | Yes | Alive | MALE   | WHITE                     | 61 | 933 |
| TCGA-98-8023-01A-11R-2247-07 | Tumor | LUSC | R0 | Stage IIIA | M0 | N1 | T3  | Yes | Alive | MALE   | WHITE                     | 70 | 649 |
| TCGA-98-A538-01A-11R-A262-07 | Tumor | LUSC | R0 | Stage IIB  | M0 | N0 | T3  | Yes | Alive | MALE   | WHITE                     | 67 | 826 |
| TCGA-98-A539-01A-31R-A262-07 | Tumor | LUSC | R0 | Stage IIB  | M0 | N0 | T3  | Yes | Alive | MALE   | WHITE                     | 63 | 173 |

|                                      |       |      |    |           |    |    |     |     |       |        |                                    |    |     |
|--------------------------------------|-------|------|----|-----------|----|----|-----|-----|-------|--------|------------------------------------|----|-----|
| TCGA-98-<br>A53A-01A-11R-<br>A262-07 | Tumor | LUSC | R0 | Stage IB  | M0 | N0 | T2a | Yes | Alive | MALE   | BLACK<br>OR<br>AFRICAN<br>AMERICAN | 70 | 552 |
| TCGA-98-<br>A53B-01A-11R-<br>A262-07 | Tumor | LUSC | R0 | Stage IB  | M0 | N0 | T2a | Yes | Dead  | MALE   | WHITE                              | 69 | 61  |
| TCGA-98-<br>A53C-01A-<br>11R-A262-07 | Tumor | LUSC | R0 | Stage IA  | M0 | N0 | T1a | Yes | Alive | FEMALE | WHITE                              | 77 | 822 |
| TCGA-98-<br>A53D-01A-<br>32R-A262-07 | Tumor | LUSC | R0 | Stage IIB | M0 | N0 | T3  | Yes | Alive | MALE   | WHITE                              | 68 | 645 |
| TCGA-98-<br>A53H-01A-<br>12R-A262-07 | Tumor | LUSC | R0 | Stage IA  | M0 | N0 | T1a | Yes | Alive | FEMALE | WHITE                              | 76 | 618 |
| TCGA-98-A53I-<br>01A-31R-A262-<br>07 | Tumor | LUSC | R0 | Stage IIA | M0 | N1 | T2a | Yes | Alive | MALE   | WHITE                              | 64 | 565 |

|                                      |       |      |    |            |    |    |     |     |       |        |                                 |    |     |
|--------------------------------------|-------|------|----|------------|----|----|-----|-----|-------|--------|---------------------------------|----|-----|
| TCGA-98-<br>A53J-01A-11R-<br>A26W-07 | Tumor | LUSC | R0 | Stage IB   | M0 | N0 | T2a | Yes | Alive | MALE   | WHITE                           | 77 | 630 |
| TCGA-J1-<br>A4AH-01A-<br>31R-A24H-07 | Tumor | LUSC | R0 | Stage IIA  | MX | N0 | T2b | Yes | Alive | MALE   | WHITE                           | 70 | 581 |
| TCGA-L3-<br>A4E7-01A-11R-<br>A24Z-07 | Tumor | LUSC | R0 | Stage IB   | M0 | N0 | T2a | Yes | Alive | MALE   | WHITE                           | 71 | 392 |
| TCGA-L3-<br>A524-01A-11R-<br>A262-07 | Tumor | LUSC | R0 | Stage IIB  | M0 | N0 | T3  | Yes | Alive | FEMALE | WHITE                           | 45 | 490 |
| TCGA-LA-<br>A446-01A-21R-<br>A24Z-07 | Tumor | LUSC | R0 | Stage IA   | MX | N0 | T1b | Yes | Alive | MALE   | WHITE                           | 68 | 401 |
| TCGA-LA-<br>A7SW-01A-<br>11R-A405-07 | Tumor | LUSC | R0 | Stage IIIA | MX | N1 | T3  | Yes | Alive | MALE   | BLACK OR<br>AFRICAN<br>AMERICAN | 71 | 408 |

|                              |       |      |               |            |    |    |     |     |       |      |       |    |      |
|------------------------------|-------|------|---------------|------------|----|----|-----|-----|-------|------|-------|----|------|
| TCGA-MF-A522-01A-11R-A262-07 | Tumor | LUSC | Not Available | Stage IB   | MX | N0 | T2a | Yes | Alive | MALE | WHITE | 54 | 360  |
| TCGA-NC-A5HD-01A-11R-A26W-07 | Tumor | LUSC | R0            | Stage IIB  | M0 | N0 | T3  | Yes | Dead  | MALE | WHITE | 79 | 2    |
| TCGA-NC-A5HE-01A-11R-A26W-07 | Tumor | LUSC | R0            | Stage IIB  | M0 | N1 | T2  | Yes | Alive | MALE | WHITE | 60 | 2336 |
| TCGA-NC-A5HF-01A-11R-A26W-07 | Tumor | LUSC | R0            | Stage IIIB | MX | N0 | T4  | Yes | Dead  | MALE | WHITE | 74 | 138  |
| TCGA-NC-A5HG-01A-11R-A26W-07 | Tumor | LUSC | R0            | Stage IIIA | M0 | N2 | T2  | Yes | Alive | MALE | WHITE | 59 | 1963 |
| TCGA-NC-A5HH-01A-11R-A26W-07 | Tumor | LUSC | R0            | Stage IA   | M0 | N0 | T1  | Yes | Alive | MALE | WHITE | 53 | 37   |

|                              |       |      |    |           |    |    |     |     |       |        |       |    |      |
|------------------------------|-------|------|----|-----------|----|----|-----|-----|-------|--------|-------|----|------|
| TCGA-NC-A5HI-01A-11R-A26W-07 | Tumor | LUSC | R0 | Stage IB  | M0 | N0 | T2  | Yes | Alive | FEMALE | WHITE | 68 | 1743 |
| TCGA-NC-A5HJ-01A-11R-A26W-07 | Tumor | LUSC | R0 | Stage IIB | M0 | N0 | T3  | Yes | Dead  | MALE   | WHITE | 59 | 418  |
| TCGA-NC-A5HK-01A-11R-A26W-07 | Tumor | LUSC | R0 | Stage IIB | M0 | N0 | T3  | Yes | Alive | FEMALE | WHITE | 58 | 128  |
| TCGA-NC-A5HL-01A-11R-A26W-07 | Tumor | LUSC | R0 | Stage IIA | M0 | N0 | T2b | Yes | Dead  | MALE   | WHITE | 73 | 88   |
| TCGA-NC-A5HM-01A-12R-A26W-07 | Tumor | LUSC | R0 | Stage IB  | M0 | N0 | T2a | Yes | Alive | MALE   | WHITE | 76 | 1212 |
| TCGA-NC-A5HN-01A-11R-A26W-07 | Tumor | LUSC | R0 | Stage IIA | M0 | N1 | T2a | Yes | Alive | MALE   | WHITE | 77 | 1499 |



|                              |       |      |               |            |     |    |     |     |       |        |         |    |      |
|------------------------------|-------|------|---------------|------------|-----|----|-----|-----|-------|--------|---------|----|------|
| TCGA-NC-A5HO-01A-11R-A26W-07 | Tumor | LUSC | Not Evaluated | Stage IIIA | M0  | N1 | T3  | Yes | Alive | FEMALE | WHITE   | 70 | 1336 |
| TCGA-NC-A5HP-01A-11R-A26W-07 | Tumor | LUSC | R0            | Stage IV   | M1b | N0 | T2a | Yes | Alive | MALE   | WHITE   | 69 | 770  |
| TCGA-NC-A5HQ-01A-11R-A26W-07 | Tumor | LUSC | R0            | Stage IIIA | M0  | N2 | T3  | Yes | Dead  | MALE   | WHITE   | 70 | 448  |
| TCGA-NC-A5HR-01A-21R-A26W-07 | Tumor | LUSC | R0            | Stage IIA  | M0  | N1 | T2a | Yes | Alive | FEMALE | WHITE   | 75 | 1244 |
| TCGA-NC-A5HT-01A-11R-A26W-07 | Tumor | LUSC | R0            | Stage IIIA | M0  | N1 | T3  | Yes | Alive | MALE   | WHITE   | 69 | 804  |
| TCGA-NK-A5CR-01A-11R-A26W-07 | Tumor | LUSC | Not Evaluated | Stage IB   | MX  | N0 | T2  | Yes | Alive | MALE   | Unknown | 77 | 2542 |

|                              |       |      |               |            |    |    |     |             |       |        |                           |    |      |
|------------------------------|-------|------|---------------|------------|----|----|-----|-------------|-------|--------|---------------------------|----|------|
| TCGA-NK-A5CT-01A-31R-A26W-07 | Tumor | LUSC | Not Evaluated | Stage IA   | M0 | N0 | T1  | Discrepancy | Alive | MALE   | WHITE                     | 70 | 1997 |
| TCGA-NK-A5CX-01A-11R-A26W-07 | Tumor | LUSC | Not Evaluated | Stage IIA  | MX | N0 | T2b | Yes         | Alive | MALE   | WHITE                     | 73 | 111  |
| TCGA-NK-A5D1-01A-11R-A26W-07 | Tumor | LUSC | Not Evaluated | Stage IIA  | M0 | N1 | T2a | Discrepancy | Alive | MALE   | WHITE                     | 57 | 511  |
| TCGA-NK-A7XE-01A-12R-A405-07 | Tumor | LUSC | Not Available | Stage IIIB | M0 | N2 | T4  | Yes         | Alive | MALE   | BLACK OR AFRICAN AMERICAN | 66 | 13   |
| TCGA-O2-A52N-01A-11R-A26W-07 | Tumor | LUSC | Not Available | Stage I    | MX | N0 | T2  | Yes         | Dead  | MALE   | WHITE                     | 78 | 1006 |
| TCGA-O2-A52Q-01A-11R-A26W-07 | Tumor | LUSC | Not Evaluated | Stage III  | MX | N1 | T3  | Yes         | Dead  | FEMALE | WHITE                     | 44 | 113  |
| TCGA-O2-A52S-01A-11R-A262-07 | Tumor | LUSC | Not Evaluated | Stage III  | MX | N2 | T4  | Yes         | Dead  | FEMALE | WHITE                     | 57 | 387  |

|                                      |       |      |                  |           |    |    |     |     |      |        |                              |    |    |      |
|--------------------------------------|-------|------|------------------|-----------|----|----|-----|-----|------|--------|------------------------------|----|----|------|
| TCGA-O2-<br>A52V-01A-31R-<br>A262-07 | Tumor | LUSC | Not<br>Evaluated | Stage II  | MX | N0 | T3  | Yes | Dead | FEMALE | BLACK<br>AFRICAN<br>AMERICAN | OR | 75 | 1335 |
| TCGA-O2-<br>A52W-01A-<br>11R-A26W-07 | Tumor | LUSC | Not<br>Evaluated | Stage I   | MX | N0 | T2  | Yes | Dead | MALE   | BLACK<br>AFRICAN<br>AMERICAN | OR | 63 | 261  |
| TCGA-O2-<br>A51B-01A-11R-<br>A27Q-07 | Tumor | LUSC | Not<br>Evaluated | Stage III | MX | N1 | T3  | Yes | Dead | FEMALE | WHITE                        |    | 71 | 340  |
| TCGA-XC-<br>AA0X-01A-<br>32R-A405-07 | Tumor | LUSC | R0               | Stage IA  | M0 | N0 | T1a | Yes | Dead | FEMALE | BLACK<br>AFRICAN<br>AMERICAN | OR | 77 | 6    |

---

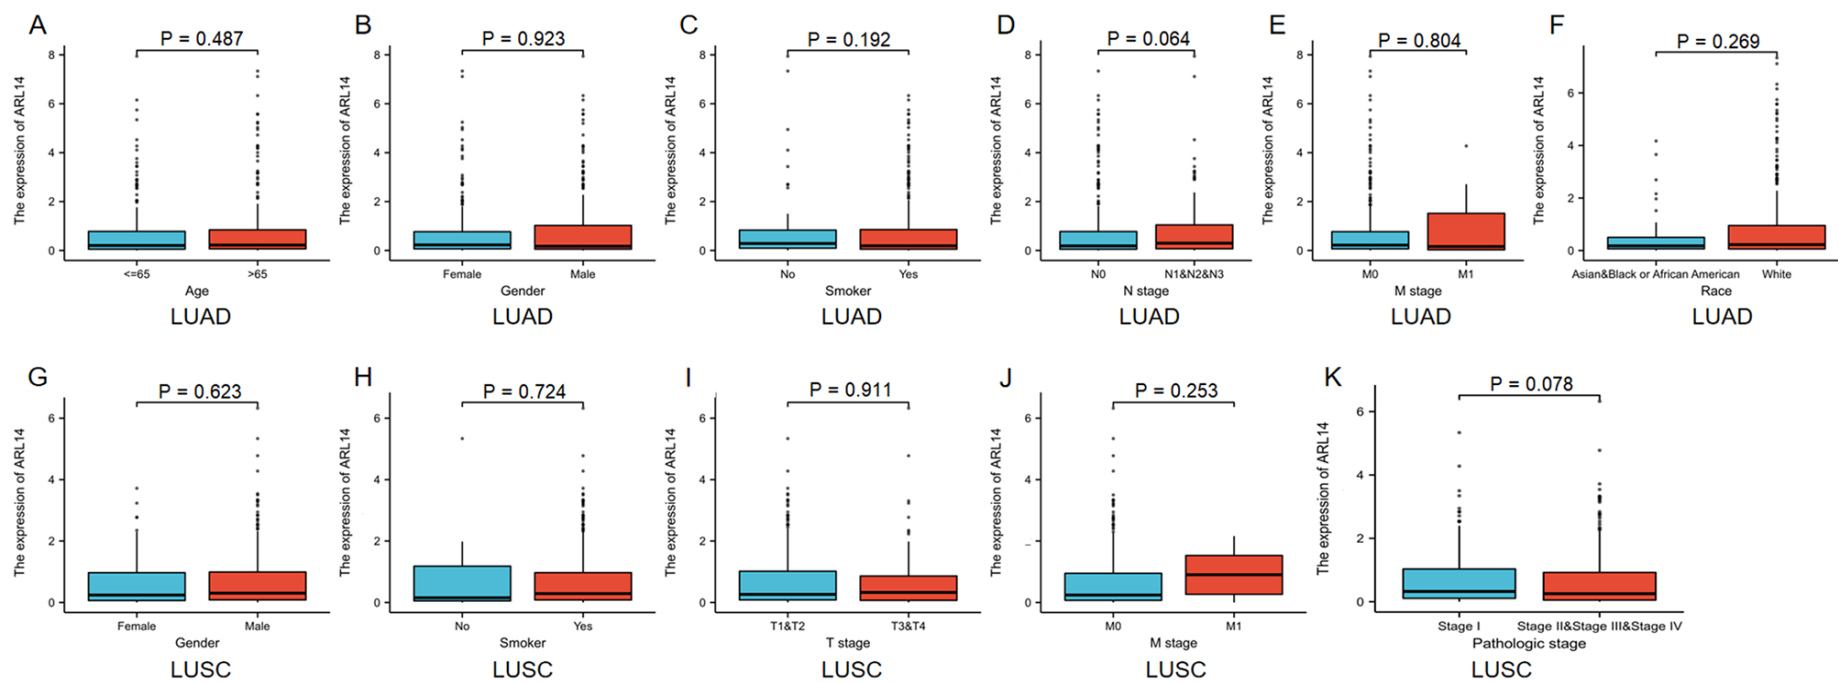

**Figure S1** Correlation between ARL14 expression and clinicopathologic features in patients with LUAD and LUSC in TCGA database ( $P \geq 0.05$ ). (A–F) The correlation between the expression of ARL14 and age (A), gender (B), smoker history (C), N stage (D), M stage (E) and race (F) of patients with LUAD. (G–K) The correlation between the expression of ARL14 and gender (G), smoker history (H), T stage (I), M stage (J) and pathologic stage (K) of patients with LUSC.
